# Supplementary material for: Advanced maternal age alters expression of maternal effect genes that are essential for human oocyte quality
Source: Aging (Albany NY). 2020 Feb 25;12(4):3950–61. doi: 10.18632/aging.102864 (PMC7066876; doi:10.18632/aging.102864)
Supplement: Supplementary Data [file aging-12-102864-s002..xlsx]

## Sheet: Supplementary_Data1_DEG_elder_v
ID	baseMean	log2FoldChange	lfcSE	stat	pvalue	padj	symbol	chr	young_rep1	young_rep2	young_rep3	old_rep1	old_rep2	old_rep3
ENSG00000000003	123.359	-0.354336	1.09284	-0.324235	0.74576	0.959031	TSPAN6	chrX	0.223202	2.95913	0.027492	0.473677	0.48277	0.413912
ENSG00000000005	0	NA	NA	NA	NA	NA	TNMD	chrX	0	0	0	0	0	0
ENSG00000000419	4493.87	0.504807	0.28964	1.74288	0.0813554	0.493448	DPM1	chr20	53.1546	57.7944	63.8285	91.3853	98.1209	63.6955
ENSG00000000457	1297.75	-0.0577589	0.628504	-0.0918991	0.926778	0.988878	SCYL3	chr1	14.4834	2.749	5.93229	8.72267	2.02619	4.51321
ENSG00000000460	157.071	-0.0553733	0.531846	-0.104115	0.917078	0.987912	C1orf112	chr1	0.438076	0.83249	0.673483	1.39982	0.465449	0.863205
ENSG00000000938	0	NA	NA	NA	NA	NA	FGR	chr1	0	0	0	0	0	0
ENSG00000000971	2.62386	-0.422214	3.79584	-0.111231	0.911433	NA	CFH	chr1	0	0.088227	0.003683	0.020142	0	0
ENSG00000001036	49.5406	2.20441	1.55875	1.41422	0.157299	0.636742	FUCA2	chr6	0.030624	0.150607	0.192087	0.986285	0.013815	1.46509
ENSG00000001084	543.953	0.970869	0.478382	2.02948	0.0424089	0.377518	GCLC	chr6	1.10476	0.331583	0.648982	0.393123	3.01906	2.6823
ENSG00000001167	540.944	-0.303777	0.463746	-0.65505	0.512436	0.901449	NFYA	chr6	3.62602	3.02519	3.27384	4.12584	2.13186	1.90817
ENSG00000001460	2147.42	-0.314653	0.495553	-0.634954	0.525458	0.908339	STPG1	chr1	13.7225	8.52663	4.30024	7.38679	14.117	7.74807
ENSG00000001461	1304.8	0.26643	0.320132	0.83225	0.405268	0.855533	NIPAL3	chr1	9.9458	8.27701	10.056	16.1647	17.0508	10.623
ENSG00000001497	471.689	-0.248744	0.607458	-0.409484	0.682185	0.947457	LAS1L	chrX	5.61228	2.73723	2.60118	2.03695	0.964707	2.80393
ENSG00000001561	34.5338	-1.54397	1.80803	-0.853953	0.393131	0.847464	ENPP4	chr6	0.137635	0.492241	0.007304	0.035391	0.216543	0
ENSG00000001617	1.24704	-2.56282	3.94587	-0.649494	0.516019	NA	SEMA3F	chr3	0	0	0.026648	0	0.003174	0
ENSG00000001626	4434.13	0.615179	0.383218	1.6053	0.108428	0.551163	CFTR	chr7	20.8817	38.5745	1.62773	31.9116	31.5533	30.1903
ENSG00000001629	1538.14	-0.0711997	0.488781	-0.145668	0.884184	0.982358	ANKIB1	chr7	4.45594	6.94221	13.9115	6.44768	4.72767	8.89869
ENSG00000001630	8.35267	-0.769212	1.57843	-0.487327	0.626027	0.937305	CYP51A1	chr7	2.55291	8.14502	2.62075	10.3497	3.38187	10.6985
ENSG00000001631	786.691	-0.845914	0.387002	-2.18581	0.0288293	0.323522	KRIT1	chr7	4.03257	3.61073	6.07125	2.9558	3.96381	2.0393
ENSG00000002016	39.2617	-0.337407	1.34853	-0.250204	0.80243	0.972204	RAD52	chr12	0.375518	0.012856	0.276151	0.385918	0.154769	0.065205
ENSG00000002079	29.7425	0.965494	1.36413	0.707775	0.479085	0.892427	MYH16	chr7	0.152756	0.013923	0.004486	0.191287	0.223722	0.002126
ENSG00000002330	112.565	1.13078	0.61688	1.83307	0.0667919	0.457657	BAD	chr11	0.555445	1.61513	1.17794	3.62664	3.48815	2.75818
ENSG00000002549	457.789	1.07674	0.373291	2.88446	0.00392091	0.127422	LAP3	chr4	3.5315	2.89339	2.50071	4.19422	2.22036	4.48348
ENSG00000002586	0	NA	NA	NA	NA	NA	CD99	chrX	83.8068	81.8325	38.6471	72.0146	113.786	121.291
ENSG00000002586.1	0	NA	NA	NA	NA	NA	CD99	chrY	83.8068	81.8325	38.6471	72.0146	113.786	121.291
ENSG00000002587	12.8452	7.22151	3.56579	2.02522	NA	NA	HS3ST1	chr4	0	0	0	0.199182	0	0
ENSG00000002726	0	NA	NA	NA	NA	NA	AOC1	chr7	0	0	0	0	0	0
ENSG00000002745	0.683595	2.98859	3.97241	0.752337	0.451848	NA	WNT16	chr7	0	0	0	0	0.018099	0
ENSG00000002746	19.8737	-2.49403	2.03256	-1.22704	0.219808	0.717848	HECW1	chr7	0.020586	0.077599	0.001077	0.004982	0.122995	0.008664
ENSG00000002822	333.066	0.619429	0.64038	0.967284	0.333402	0.807166	MAD1L1	chr7	1.22214	0.207105	0.550977	0.332132	0.413058	0.075607
ENSG00000002834	524.717	0.303215	0.363338	0.834526	0.403984	0.854568	LASP1	chr17	1.84994	1.05083	2.45925	4.03765	0.99291	1.04662
ENSG00000002919	441.271	-0.305953	0.497337	-0.615183	0.538434	0.912385	SNX11	chr17	4.55938	4.56651	0.756983	4.48887	0.65937	1.20276
ENSG00000002933	6.52198	-0.753753	2.74412	-0.274679	0.783563	NA	TMEM176A	chr7	0.030619	0	0.038569	0.105886	0.00836	0
ENSG00000003056	1451.07	-0.983533	0.436465	-2.2534	0.0242337	0.298759	M6PR	chr12	11.8135	17.664	5.90333	10.9339	8.1426	3.91894
ENSG00000003096	5.54213	-0.872925	2.88031	-0.303066	0.761839	NA	KLHL13	chrX	0.002284	0.005523	0.000455	0.001654	3.4e-05	0.000566
ENSG00000003137	23.9474	4.03637	1.38487	2.91462	0.00356127	0.122748	CYP26B1	chr2	0.00242	0.003618	0.025872	0.031808	0.259113	0.264312
ENSG00000003147	960.361	0.151843	0.446881	0.339785	0.734018	0.957263	ICA1	chr7	6.38247	5.14807	7.14827	5.19712	6.55532	11.019
ENSG00000003249	17.079	-0.557097	2.11003	-0.264023	0.791762	0.971342	DBNDD1	chr16	0.01463	0.472547	0.060774	0.01428	0	0.296101
ENSG00000003393	1325.07	-0.453472	0.358104	-1.26631	0.205401	0.702352	ALS2	chr2	5.3209	2.84067	5.23087	2.51123	1.9672	4.11472
ENSG00000003400	0.12238	-0.840481	4.08047	-0.205976	0.836809	NA	CASP10	chr2	0	6.2e-05	0	0	0	0
ENSG00000003402	68.4102	0.666817	0.952408	0.700138	0.483841	0.893377	CFLAR	chr2	0.089752	0.066296	0.195115	0.44403	0.102169	0.559842
ENSG00000003436	72.6458	2.10173	1.03453	2.03158	0.0421963	0.377279	TFPI	chr2	0.005095	0.016672	0.02598	0.043228	0.013983	0.173129
ENSG00000003509	576.316	0.56117	0.446124	1.25788	0.208436	0.703923	NDUFAF7	chr2	5.15142	2.25955	2.17024	6.67613	4.0065	9.50474
ENSG00000003756	145.198	0.593302	0.52412	1.132	0.257635	0.751708	RBM5	chr3	0.699992	0.830872	0.377266	1.28973	0.939162	0.814301
ENSG00000003987	216.213	-0.708654	0.749553	-0.945436	0.344436	0.814978	MTMR7	chr8	0.455392	0.467602	1.17218	2.2583	0.172022	0.082766
ENSG00000003989	231.667	0.333421	0.745851	0.447034	0.65485	0.943247	SLC7A2	chr8	0.323053	0.473907	0.240693	0.110462	0.914073	0.43442
ENSG00000004059	2738.04	0.574303	0.326079	1.76124	0.0781984	0.486939	ARF5	chr7	56.1096	39.8754	33.8679	55.7091	97.9351	74.0901
ENSG00000004139	0.153734	-0.840481	4.08047	-0.205976	0.836809	NA	SARM1	chr17	0.032428	0	0.023879	0.027348	0.000711	0
ENSG00000004142	1417.95	0.140308	0.569353	0.246434	0.805347	0.972204	POLDIP2	chr17	15.6678	14.1384	5.26383	24.6272	7.57482	11.7951
ENSG00000004399	29.0329	0.358794	1.45093	0.247286	0.804687	0.972204	PLXND1	chr3	0.047225	0.145546	0.053723	0.138546	0.004487	0.132858
ENSG00000004455	932.926	0.162708	0.405766	0.400991	0.688427	0.948515	AK2	chr1	7.09333	6.85555	2.95654	4.38202	3.79374	5.66546
ENSG00000004468	891.472	0.540478	0.478908	1.12856	0.259082	0.753088	CD38	chr4	1.55118	2.32899	1.97912	1.51156	3.64447	4.36288
ENSG00000004478	494.22	0.347147	0.378732	0.916603	0.359351	0.826445	FKBP4	chr12	2.10213	1.46426	2.113	2.45815	3.18894	2.10651
ENSG00000004487	2082.88	0.617653	0.344728	1.79171	0.0731787	0.475481	KDM1A	chr1	3.65747	7.23238	6.53767	10.4432	9.80777	9.44817
ENSG00000004534	1807.01	-0.280981	0.347876	-0.807705	0.419261	0.863789	RBM6	chr3	0.842538	0.840491	7.88751	0.85032	0.703902	0.968749
ENSG00000004660	32.3246	6.10028	1.89458	3.21986	0.00128254	0.069231	CAMKK1	chr17	0	0	0.013253	0.210921	0.336188	0.005765
ENSG00000004700	799.326	-0.855158	0.572544	-1.49361	0.135277	0.600194	RECQL	chr12	13.2642	7.40766	7.05187	7.81708	3.13452	6.90168
ENSG00000004766	2401.76	-0.426425	0.382068	-1.1161	0.264381	0.756288	VPS50	chr7	11.6057	10.1529	12.4508	8.76494	3.97951	2.86192
ENSG00000004776	14.3867	-1.5883	2.30668	-0.688568	0.491095	0.894397	HSPB6	chr19	0.096412	1.09672	0.463314	0.119776	0.315905	0.519108
ENSG00000004777	320.079	1.73223	0.67935	2.54983	0.0107774	0.206026	ARHGAP33	chr19	1.45128	1.15256	1.22208	6.79824	2.23339	9.99634
ENSG00000004779	7279.83	0.399395	0.41126	0.971149	0.331474	0.805564	NDUFAB1	chr16	108.957	213.817	86.7068	169.359	274.42	233.889
ENSG00000004799	40.6266	-8.76132	2.26175	-3.87368	0.000107203	0.015244	PDK4	chr7	0.481775	1.58689	0	0	0	0
ENSG00000004809	3.38219	5.29704	3.9201	1.35125	0.176615	NA	SLC22A16	chr6	0	0	0	0.101033	0.001503	0
ENSG00000004838	0	NA	NA	NA	NA	NA	ZMYND10	chr3	0	0	0	0	0	0
ENSG00000004846	0.153734	-0.840481	4.08047	-0.205976	0.836809	NA	ABCB5	chr7	0	0	0.000267	0	0	0
ENSG00000004848	119.777	-0.306268	0.912062	-0.335797	0.737024	0.957669	ARX	chrX	0.522549	0.650276	0.922645	0.183532	2.04147	0.190967
ENSG00000004864	1447.7	-0.112534	0.501086	-0.22458	0.822306	0.973714	SLC25A13	chr7	14.818	5.82271	5.02498	11.663	7.01556	6.84644
ENSG00000004866	558.499	-0.127317	0.352166	-0.361525	0.717707	0.953669	ST7	chr7	2.87454	2.34177	1.83607	3.07565	4.21093	5.37619
ENSG00000004897	4138.53	-0.255044	0.250827	-1.01681	0.309242	0.789651	CDC27	chr17	17.7623	29.4484	19.0072	22.0225	17.2257	28.0814
ENSG00000004939	7.51769	1.26327	3.70089	0.341342	0.732847	NA	SLC4A1	chr17	0.048561	0	0	0	0.127411	0
ENSG00000004948	5.17932	-5.78734	3.72321	-1.5544	0.12009	NA	CALCR	chr7	0.016215	0	0.013668	0	0	0
ENSG00000004961	406.336	0.566476	0.455114	1.24469	0.213245	0.709595	HCCS	chrX	5.2266	7.36378	2.37097	11.9397	4.25272	6.45213
ENSG00000004975	2465.57	0.34275	0.446147	0.768245	0.442342	0.87741	DVL2	chr17	13.2177	4.21222	6.70254	13.5536	9.80944	9.35992
ENSG00000005001	75.6056	0.430833	1.50009	0.287206	0.773955	0.966917	PRSS22	chr16	1.87399	0	0.158026	0.484139	1.55025	0.268361
ENSG00000005007	480.144	0.799895	0.516252	1.54943	0.121279	0.576544	UPF1	chr19	0.296994	0.284098	0.55311	0.297152	1.77317	0.692988
ENSG00000005020	11396	-0.531675	0.339493	-1.56609	0.117328	0.569094	SKAP2	chr7	66.8743	41.7278	53.4777	49.3963	51.4519	33.6821
ENSG00000005022	549.544	0.998029	0.527793	1.89095	0.0586314	0.43436	SLC25A5	chrX	9.38652	7.85011	10.8098	39.4777	19.1051	9.60603
ENSG00000005059	2550.96	0.0319536	0.339554	0.0941048	0.925026	0.988668	MCUB	chr4	0.393834	8.52567	6.53355	0.539753	4.23329	0.538844
ENSG00000005073	0	NA	NA	NA	NA	NA	HOXA11	chr7	0	0	0	0	0	0
ENSG00000005075	605.645	-1.28686	0.619152	-2.07843	0.0376701	0.363011	POLR2J	chr7	24.3908	35.7102	45.3665	29.5811	35.0628	31.8406
ENSG00000005100	1500.79	0.158477	0.498191	0.318104	0.750406	0.9608	DHX33	chr17	2.81046	4.0492	7.19635	3.42197	7.94007	6.06437
ENSG00000005102	1.60565	4.22357	3.93479	1.07339	0.283095	NA	MEOX1	chr17	0	0	0	0.076047	0	0
ENSG00000005108	4651.71	-0.0552062	0.35793	-0.154237	0.877423	0.980974	THSD7A	chr7	8.76081	5.55479	6.45535	10.086	8.99544	5.48346
ENSG00000005156	94.6391	-0.395234	0.636096	-0.621343	0.534374	0.912318	LIG3	chr17	0.621481	0.81701	1.11529	0.533727	1.13189	0.905243
ENSG00000005175	3455.82	-0.771213	0.316673	-2.43536	0.014877	0.23967	RPAP3	chr12	16.7105	21.7171	16.1673	9.83355	12.0763	14.5688
ENSG00000005187	379.476	0.223567	2.07487	0.10775	0.914194	0.987912	ACSM3	chr16	0.11945	0.404041	3.8151	1.53317	0.042239	4.5722
ENSG00000005189	332.945	0.154429	0.497502	0.31041	0.756249	0.962043	REXO5	chr16	1.41979	0.801183	0.925828	2.30159	0.375092	1.07944
ENSG00000005194	19211.6	-0.434309	0.394135	-1.10193	0.270492	0.759918	CIAPIN1	chr16	268.204	85.3489	152.948	142.108	102.533	143.314
ENSG00000005206	152.685	1.1595	0.674005	1.72032	0.0853744	0.504641	SPPL2B	chr19	0.483302	0.321191	0.317519	0.540485	0.980979	0.618045
ENSG00000005238	0.178064	1.08307	4.08047	0.265428	0.79068	NA	FAM214B	chr9	0	0	0	0	0	0.004389
ENSG00000005243	0	NA	NA	NA	NA	NA	COPZ2	chr17	0	0	0	0	0	0
ENSG00000005249	1562.54	-0.494107	0.551324	-0.896217	0.370137	0.834143	PRKAR2B	chr7	4.44854	6.27544	16.4191	3.53507	8.2265	9.21144
ENSG00000005302	8960.59	0.348862	0.425798	0.819313	0.412608	0.860671	MSL3	chrX	85.0582	35.8939	47.3671	88.4554	85.6099	47.5213
ENSG00000005339	6308.2	0.142192	0.295294	0.481528	0.630141	0.937305	CREBBP	chr16	7.22157	15.376	6.84828	3.23379	3.51107	4.53272
ENSG00000005379	3.53593	4.33538	3.75129	1.1557	0.247802	NA	TSPOAP1	chr17	0	0	0.006171	0.099079	0.003849	0
ENSG00000005381	0	NA	NA	NA	NA	NA	MPO	chr17	0	0	0	0	0	0
ENSG00000005421	107.502	0.55996	0.822761	0.680587	0.496133	0.896302	PON1	chr7	0.611521	0.518103	0.53699	2.05926	0.547204	0.204833
ENSG00000005436	418.143	-0.445331	0.56595	-0.786874	0.431355	0.869536	GCFC2	chr2	1.80493	2.9628	5.77729	2.87286	2.3752	4.86836
ENSG00000005448	38.6768	-0.725089	1.04412	-0.694449	0.487401	0.894237	WDR54	chr2	0.171181	0.114739	0.726627	0.319512	0.17518	0.260864
ENSG00000005469	105.892	1.30595	0.772816	1.68986	0.0910543	0.515232	CROT	chr7	0.31449	0.275714	0.492732	0.525174	0.240829	2.01914
ENSG00000005471	6390.7	0.733628	0.458362	1.60055	0.109478	0.552734	ABCB4	chr7	12.1193	14.1848	9.25129	75.8894	27.213	12.6795
ENSG00000005483	4832.18	-0.423445	0.315977	-1.34011	0.180208	0.673911	KMT2E	chr7	20.6832	21.9778	19.4125	23.1622	20.8941	10.3401
ENSG00000005486	193.212	0.374025	0.664353	0.562992	0.57344	0.923625	RHBDD2	chr7	0.436604	0.732439	1.07825	1.70894	0.407006	0.561016
ENSG00000005513	0.153734	-0.840481	4.08047	-0.205976	0.836809	NA	SOX8	chr16	0	0	0.007691	0	0	0
ENSG00000005700	171.945	-0.00928694	0.825044	-0.0112563	0.991019	0.999151	IBTK	chr6	0.035666	0.280416	0.466274	0.113394	0.459834	0.274468
ENSG00000005801	1358.19	-0.767838	0.425776	-1.80338	0.071328	0.47193	ZNF195	chr11	11.2215	2.03691	2.09588	1.47729	0.743606	2.14286
ENSG00000005810	1045.43	-0.511473	0.521522	-0.980733	0.326724	0.802497	MYCBP2	chr13	2.16753	2.02655	3.43239	1.1325	5.75787	1.17332
ENSG00000005812	1961.27	0.215383	0.496168	0.434093	0.664221	0.945891	FBXL3	chr13	4.55426	9.36126	16.8447	13.9894	2.73843	3.36264
ENSG00000005844	1.61442	-4.09655	3.93313	-1.04155	0.29762	NA	ITGAL	chr16	0.023117	0	0	0	0	0
ENSG00000005882	133.914	-1.00383	0.867336	-1.15737	0.247119	0.742896	PDK2	chr17	2.44829	0.685856	0.728243	1.44353	0.710396	0.663699
ENSG00000005884	38.6642	0.326743	1.54735	0.211163	0.83276	0.97513	ITGA3	chr17	0.030592	0.054191	0.117141	0	0.23417	0.047813
ENSG00000005889	139.425	0.700549	0.530788	1.31983	0.186892	0.681866	ZFX	chrX	0.059206	0.078086	0.041104	0.115637	0.102232	0.171899
ENSG00000005893	4587.75	-0.422468	0.42761	-0.987977	0.323164	0.801041	LAMP2	chrX	56.5673	52.8251	25.7913	8.35921	4.55207	38.0416
ENSG00000005961	1.05792	1.62955	3.93634	0.413975	0.678893	NA	ITGA2B	chr17	0	0	0	0	0.006451	0
ENSG00000005981	0	NA	NA	NA	NA	NA	ASB4	chr7	0	0	0	0	0	0
ENSG00000006007	90.5447	0.130218	0.907351	0.143514	0.885884	0.982677	GDE1	chr16	1.06564	0.431949	0.20391	0.565173	0.144992	0.620987
ENSG00000006015	20.9982	0.271451	2.08142	0.130416	0.896237	0.983577	C19orf60	chr19	0	0.234908	0.127021	0.097627	0.476978	0
ENSG00000006016	0	NA	NA	NA	NA	NA	CRLF1	chr19	0.10288	0.008375	0.006663	0.121541	0	0
ENSG00000006025	0	NA	NA	NA	NA	NA	OSBPL7	chr17	0	0	0	0	0	0
ENSG00000006042	57.1275	0.102474	1.565	0.0654785	0.947793	0.991867	TMEM98	chr17	0	0.290379	0.373991	0.063601	0.061943	0.718894
ENSG00000006047	120.842	1.06639	0.771915	1.38149	0.167128	0.650697	YBX2	chr17	0.548407	0.649664	0.422051	0.198202	2.96882	1.55747
ENSG00000006059	0	NA	NA	NA	NA	NA	KRT33A	chr17	0	0	0	0	0	0
ENSG00000006062	1.89309	-0.742198	3.82778	-0.193898	0.846256	NA	MAP3K14	chr17	0.014565	0.01222	0	0	0.010287	0.173917
ENSG00000006071	0.153734	-0.840481	4.08047	-0.205976	0.836809	NA	ABCC8	chr11	0	0	0.004995	0	0	0
ENSG00000006116	0	NA	NA	NA	NA	NA	CACNG3	chr16	0	0	0	0	0	0
ENSG00000006118	37.2222	1.67373	1.14242	1.46508	0.1429	0.61072	TMEM132A	chr11	0.03533	0.015408	0.245416	0.074881	0.183521	0.270148
ENSG00000006125	2505.85	-0.259913	0.397048	-0.654614	0.512716	0.901456	AP2B1	chr17	14.1818	5.41852	8.83548	10.9369	18.9943	5.84
ENSG00000006128	4.65042	-5.63741	3.91585	-1.43964	0.14997	NA	TAC1	chr7	0	0.44297	0	0	0	0
ENSG00000006194	1.12368	-0.353121	3.80396	-0.09283	0.926039	NA	ZNF263	chr16	0.339463	0.322473	0.335054	0.260733	0.383596	0.278777
ENSG00000006210	0.153734	-0.840481	4.08047	-0.205976	0.836809	NA	CX3CL1	chr16	0	0	0.005678	0	0	0
ENSG00000006282	10.6418	-2.64966	2.40128	-1.10344	0.269837	0.759393	SPATA20	chr17	0.115128	0	0.241057	0.029348	0.007817	0
ENSG00000006283	0	NA	NA	NA	NA	NA	CACNA1G	chr17	0	0	0	0	0	0
ENSG00000006327	1317.22	1.03206	0.521665	1.9784	0.0478836	0.397342	TNFRSF12A	chr16	9.63861	25.7333	7.02668	22.174	39.4925	38.6377
ENSG00000006377	307.052	0.164466	0.615739	0.267104	0.789389	0.969891	DLX6	chr7	2.38644	0.832716	3.53564	2.09204	3.18331	3.25796
ENSG00000006432	692.125	-0.583189	0.548907	-1.06246	0.288029	0.773251	MAP3K9	chr14	0.290476	0.484827	0.785366	0.303599	0.662649	0.223935
ENSG00000006451	2830.71	-0.0038017	0.358947	-0.0105913	0.99155	0.999209	RALA	chr7	10.9083	11.3656	15.4699	8.16777	15.9024	16.3724
ENSG00000006453	3121.02	0.315622	0.367419	0.859024	0.390327	0.846453	BAIAP2L1	chr7	18.2583	5.16059	19.9707	16.7688	24.688	15.0902
ENSG00000006459	2681.4	-0.121937	0.317632	-0.383894	0.701057	0.951728	KDM7A	chr7	4.18565	6.91079	5.67827	6.7107	5.55483	4.93715
ENSG00000006468	80.9553	0.548236	1.08492	0.505326	0.61333	0.93368	ETV1	chr7	0.17666	0.087263	0.051708	0.155961	0.154129	0.004594
ENSG00000006530	3701.75	-0.398647	0.483332	-0.82479	0.409491	0.858372	AGK	chr7	29.7946	19.4501	9.06053	34.2548	14.7806	13.4325
ENSG00000006534	0	NA	NA	NA	NA	NA	ALDH3B1	chr11	0	0	0	0	0	0
ENSG00000006555	0.170899	1.08307	4.08047	0.265428	0.79068	NA	TTC22	chr1	0	0	0	0	0.001463	0
ENSG00000006576	2561.62	-0.539833	0.303294	-1.7799	0.0750928	0.479886	PHTF2	chr7	10.2143	7.92099	9.07864	3.46862	4.73342	4.03836
ENSG00000006606	0.80721	-3.08587	3.95965	-0.77933	0.435785	NA	CCL26	chr7	0.148765	0	0	0	0	0
ENSG00000006607	1613.97	-0.208406	0.371506	-0.560975	0.574814	0.924495	FARP2	chr2	4.30826	2.97738	6.75746	3.80677	1.9396	1.27635
ENSG00000006611	0.153734	-0.840481	4.08047	-0.205976	0.836809	NA	USH1C	chr11	0	0	0.000366	0	0	0
ENSG00000006625	1283.94	0.0507931	0.400764	0.126741	0.899145	0.984528	GGCT	chr7	110.923	241.004	167.943	210.297	219.648	259.367
ENSG00000006634	2355.81	-0.282598	0.296297	-0.953765	0.340202	0.81313	DBF4	chr7	11.202	14.4511	12.9	12.8748	15.1688	13.7103
ENSG00000006638	0	NA	NA	NA	NA	NA	TBXA2R	chr19	0	0	0	0	0	0
ENSG00000006652	2040.29	-0.762477	0.606209	-1.25778	0.208472	0.703923	IFRD1	chr7	2.58889	16.9939	8.63263	2.85659	0.86214	8.89898
ENSG00000006659	0	NA	NA	NA	NA	NA	LGALS14	chr19	0	0	0	0	0	0
ENSG00000006695	1628.48	0.367287	0.304499	1.2062	0.22774	0.72499	COX10	chr17	9.14684	10.3112	8.0548	12.2689	12.9581	13.7545
ENSG00000006704	22.6567	0.0512878	1.64621	0.031155	0.975146	0.996639	GTF2IRD1	chr7	0	0.043233	0.143257	0.089596	0.019414	0.098581
ENSG00000006712	302.427	0.742303	0.596202	1.24505	0.213112	0.709576	PAF1	chr19	2.28268	1.44551	1.53104	1.75404	2.46901	5.17519
ENSG00000006715	596.82	-0.329619	0.3851	-0.855931	0.392036	0.846843	VPS41	chr7	0.910426	0.565617	0.464151	1.00688	0.48029	0.83348
ENSG00000006740	335.111	0.963961	0.521862	1.84716	0.0647242	0.450598	ARHGAP44	chr17	0.44232	0.382713	0.286454	0.713029	0.615788	1.29639
ENSG00000006744	1926.6	0.480132	0.379916	1.26378	0.206308	0.703514	ELAC2	chr17	5.16858	5.22886	6.63287	4.93802	9.09337	8.1506
ENSG00000006747	2775.96	-0.0147351	0.53408	-0.0275896	0.977989	0.996639	SCIN	chr7	2.59739	2.47001	1.30364	4.33752	1.06588	3.78763
ENSG00000006756	98.8064	-0.644687	1.34406	-0.479658	0.631471	0.937305	ARSD	chrX	1.33386	0.17801	0.244468	0.168936	0.609387	0
ENSG00000006757	9047.22	-0.194261	0.261789	-0.742051	0.458056	0.883927	PNPLA4	chrX	61.4401	47.3093	55.4497	65.1621	72.2229	52.8003
ENSG00000006788	158.795	0.537887	0.555408	0.968454	0.332818	0.80695	MYH13	chr17	0.226093	0.275555	0.136461	0.60137	0.414483	0.137208
ENSG00000006831	3623.12	-0.305902	0.365264	-0.837482	0.402321	0.854238	ADIPOR2	chr12	6.63241	1.68053	10.5589	0.639253	1.21974	0.967885
ENSG00000006837	40.033	1.50575	1.08877	1.38299	0.166668	0.649863	CDKL3	chr5	0.17267	0.168352	0.11934	0.173347	0.071258	0.869323
ENSG00000007001	25.1853	1.29234	1.0368	1.24647	0.212592	0.709114	UPP2	chr2	0.011145	0.003799	0.012517	0.017817	0.019966	0.033131
ENSG00000007038	21.8836	0.139121	1.61317	0.0862412	0.931275	0.989667	PRSS21	chr16	0.505135	0.028526	0.072056	0.565649	0.133299	0.043373
ENSG00000007047	348.506	0.536617	0.569678	0.941966	0.34621	0.816218	MARK4	chr19	0.390436	0.361416	0.545715	0.292785	1.02367	0.573837
ENSG00000007062	0.905176	-2.02942	3.9632	-0.512066	0.608605	NA	PROM1	chr4	0	0.009335	0	0	0.002573	0
ENSG00000007080	471.684	0.482865	0.442409	1.09145	0.275077	0.762669	CCDC124	chr19	5.03836	9.75854	6.88526	10.443	8.39171	14.4184
ENSG00000007129	85.3774	3.46725	1.68749	2.05468	0.0399103	0.368852	CEACAM21	chr19	0	0	0.454758	0.721701	0.193414	2.71144
ENSG00000007168	836.474	-0.414839	0.326594	-1.2702	0.204014	0.700154	PAFAH1B1	chr17	0.578601	1.5911	3.25881	1.75725	0.429528	1.10073
ENSG00000007171	48.7904	1.54045	1.15104	1.33831	0.180795	0.674866	NOS2	chr17	0.061548	0.154296	0.115766	0.787383	0.33406	0.020464
ENSG00000007174	722.94	-0.262336	0.4167	-0.629555	0.528986	0.909967	DNAH9	chr17	1.2937	0.562855	1.66865	0.419336	0.715371	0.546608
ENSG00000007202	865.382	-0.240459	0.46549	-0.516573	0.605454	0.931651	KIAA0100	chr17	5.59317	8.04688	4.17523	6.4856	7.51193	1.69376
ENSG00000007216	0	NA	NA	NA	NA	NA	SLC13A2	chr17	0	0	0	0	0	0
ENSG00000007237	2213.15	0.0340349	0.394587	0.0862546	0.931264	0.989667	GAS7	chr17	1.03469	3.86289	1.97196	2.13472	1.32384	0.518544
ENSG00000007255	427.898	0.743934	0.418016	1.77968	0.075129	0.479886	TRAPPC6A	chr19	8.43881	8.60257	4.80954	12.4155	17.0376	11.5686
ENSG00000007264	56.7057	0.387477	1.00398	0.385941	0.699541	0.951271	MATK	chr19	0.106506	0.027999	0.039776	0.034995	0.18117	0.045138
ENSG00000007306	0	NA	NA	NA	NA	NA	CEACAM7	chr19	0	0	0	0	0	0
ENSG00000007312	0.170899	1.08307	4.08047	0.265428	0.79068	NA	CD79B	chr17	0	0	0	0	0.009767	0
ENSG00000007314	15.6981	-6.509	3.08167	-2.11217	NA	NA	SCN4A	chr17	0	0	0.222602	0	0.002092	0
ENSG00000007341	125.971	-0.859456	0.614858	-1.39781	0.162169	0.644333	ST7L	chr1	0.584214	0.472276	0.834187	0.305721	0.105384	0.205215
ENSG00000007350	253.867	0.776452	3.2368	0.239883	0.810421	0.972223	TKTL1	chrX	0.862834	2.14316	0	5.18416	0.112692	0
ENSG00000007372	6.02795	-6.01122	3.70491	-1.6225	0.104696	NA	PAX6	chr11	0	0.025227	0.001339	0	0	0
ENSG00000007376	47.0257	0.398522	1.26321	0.315485	0.752394	0.961258	RPUSD1	chr16	0.108294	0.040325	0.698155	0.192689	0.596014	0.38292
ENSG00000007384	42.4635	-1.261	1.16447	-1.08289	0.278858	0.767208	RHBDF1	chr16	0.431372	0.508786	0.10023	0.016763	0.169442	0.683217
ENSG00000007392	101.445	0.8542	1.19487	0.714889	0.474678	0.890763	LUC7L	chr16	0.009977	0.540622	0.050379	0.560139	0.285318	0.671177
ENSG00000007402	311.922	-0.0809557	0.550648	-0.147019	0.883117	0.98183	CACNA2D2	chr3	0.385373	0.21527	0.112514	0.73078	0.259695	0.264798
ENSG00000007516	100.554	1.41028	0.668869	2.10845	0.0349922	0.352434	BAIAP3	chr16	0.175454	0.145292	0.094698	0.491159	0.269631	0.261499
ENSG00000007520	6.42901	-0.283276	3.16293	-0.0895613	0.928636	NA	TSR3	chr16	0	0.542224	0.178332	0	0.315235	0
ENSG00000007541	16.563	1.58885	1.40613	1.12995	0.258499	0.752529	PIGQ	chr16	0.211575	0.091776	0.075623	0.156226	0.706269	0.394827
ENSG00000007545	551.415	0.499511	0.435095	1.14805	0.250948	0.747617	CRAMP1	chr16	1.69678	2.35661	2.60996	4.52997	4.49586	3.93582
ENSG00000007866	498.343	0.439086	0.417346	1.05209	0.292759	0.775264	TEAD3	chr6	2.94305	2.58375	1.73316	3.11128	3.83046	4.49946
ENSG00000007908	0	NA	NA	NA	NA	NA	SELE	chr1	0	0	0	0	0.011271	0
ENSG00000007923	427.29	-0.207911	0.435295	-0.477633	0.632911	0.937305	DNAJC11	chr1	2.59478	2.5293	2.55257	4.75099	0.350915	0.871306
ENSG00000007933	2.94266	5.09598	3.92209	1.2993	0.19384	NA	FMO3	chr1	0	0	0	0.018939	0	0.006872
ENSG00000007944	15920	0.282772	0.493834	0.572605	0.566912	0.922331	MYLIP	chr6	48.8147	86.961	224.872	134.34	204.131	188.699
ENSG00000007952	0.56417	-1.10405	4.01306	-0.275113	0.783229	NA	NOX1	chrX	0.000678	0	0	0.000544	0	0
ENSG00000007968	10.085	-6.74721	2.81279	-2.39876	0.0164505	0.24996	E2F2	chr1	0.243926	0.010248	0.006225	0	0	0
ENSG00000008018	1432.01	0.892779	0.399686	2.2337	0.0255028	0.305573	PSMB1	chr6	14.501	24.9406	10.6548	22.6273	36.8804	32.7323
ENSG00000008056	10.9084	-0.537866	3.42021	-0.157261	0.875039	0.980494	SYN1	chrX	0	0	0.040413	0	0	0.855441
ENSG00000008083	29768.7	0.108064	0.326893	0.330579	0.740962	0.958541	JARID2	chr6	22.1257	7.58207	7.47683	15.6894	6.67997	3.89322
ENSG00000008086	888.128	0.132354	0.518535	0.255246	0.798533	0.971524	CDKL5	chrX	0.105175	0.231627	0.175486	0.347124	0.178059	0.114158
ENSG00000008118	0	NA	NA	NA	NA	NA	CAMK1G	chr1	0	0	0	0	0	0
ENSG00000008128	36.689	0.473268	1.04662	0.452188	0.651133	0.942433	CDK11A	chr1	3.85109	1.67797	2.34401	3.47456	7.5288	5.87301
ENSG00000008130	1100.7	0.633726	0.424862	1.4916	0.135803	0.600445	NADK	chr1	5.79554	2.09153	4.22491	4.4476	5.75731	7.35313
ENSG00000008196	1699.44	-0.76402	0.424159	-1.80126	0.0716621	0.473051	TFAP2B	chr6	3.38274	7.95435	5.26279	2.93291	5.2226	2.98268
ENSG00000008197	2177.47	-0.833682	0.407882	-2.04393	0.0409604	0.37293	TFAP2D	chr6	16.9694	12.4832	25.658	8.41777	13.9309	12.6415
ENSG00000008226	153.517	-0.603793	0.736657	-0.819639	0.412422	0.860524	DLEC1	chr3	0.569168	0.27461	0.315991	0.632503	0.265278	0.185016
ENSG00000008256	145.36	1.46673	0.611119	2.40008	0.0163915	0.24996	CYTH3	chr7	0.187988	0.330172	0.172687	1.43861	0.645764	0.355808
ENSG00000008277	11.9257	-1.52301	1.91873	-0.793758	0.427336	0.868832	ADAM22	chr7	0.013921	0.005841	0.007132	0.010197	0	0.001111
ENSG00000008282	1356.18	-0.562191	0.41819	-1.34435	0.178837	0.671967	SYPL1	chr7	19.7228	9.15251	11.3993	9.96946	12.2	6.27349
ENSG00000008283	108.442	0.433313	0.624183	0.694208	0.487551	0.894237	CYB561	chr17	1.94857	0.797659	0.560728	1.88746	1.68039	0.686789
ENSG00000008294	459.725	0.0273918	0.467756	0.0585601	0.953302	0.993278	SPAG9	chr17	1.52589	3.41312	0.981433	1.80384	1.37464	1.48084
ENSG00000008300	16.605	-0.477942	1.92921	-0.24774	0.804335	0.972204	CELSR3	chr3	0.026236	0.006026	0.021506	0	0.00256	0.023149
ENSG00000008311	163.342	-1.62256	0.580138	-2.79685	0.00516028	0.146775	AASS	chr7	0.766776	1.36985	0.737606	0.294139	0.259071	0.466909
ENSG00000008323	9.48497	-6.66359	3.06655	-2.17299	0.0297807	0.328454	PLEKHG6	chr12	0	0.026622	0.051039	0	0	0
ENSG00000008324	2302.9	0.30595	0.303097	1.00941	0.312776	0.791836	SS18L2	chr3	45.8317	55.4732	42.1606	62.0123	62.8522	47.3811
ENSG00000008382	11.0181	1.22477	1.68712	0.725953	0.467868	0.889307	MPND	chr19	0.186634	0.57729	0.148162	0.857665	0.063982	0.936409
ENSG00000008394	70.9981	1.0859	0.907814	1.19617	0.23163	0.728613	MGST1	chr12	0.465385	0.098896	0.742415	0.27507	0.683899	0.357568
ENSG00000008405	16535.8	-0.291865	0.429991	-0.67877	0.497284	0.896302	CRY1	chr12	115.28	56.1652	89.8774	114.191	90.0818	74.5822
ENSG00000008438	6.76641	6.29583	3.91344	1.60877	0.107666	NA	PGLYRP1	chr19	0	0	0	0	0	0.920008
ENSG00000008441	163.626	0.557831	0.53782	1.03721	0.299639	0.78067	NFIX	chr19	0.137301	1.0671	0.334154	0.482836	0.176992	0.327874
ENSG00000008513	933.66	1.40561	0.653281	2.15161	0.0314278	0.33386	ST3GAL1	chr8	0.883612	0.370711	0.400685	2.39341	0.651324	0.876376
ENSG00000008516	0	NA	NA	NA	NA	NA	MMP25	chr16	0	0.00476	0.004791	0	0	0
ENSG00000008517	129.392	0.910061	1.26983	0.716681	0.473571	0.890679	IL32	chr16	0	1.60694	2.43223	3.2377	2.94388	1.88858
ENSG00000008710	59.5963	-0.505347	1.24198	-0.406889	0.68409	0.94775	PKD1	chr16	0.002697	0.077612	0.424413	0.114693	0.094221	0.034535
ENSG00000008735	82.5786	0.303632	1.48306	0.204734	0.83778	0.975628	MAPK8IP2	chr22	0.17938	0.037845	0.469832	0.229028	0.751597	0
ENSG00000008838	185.096	-1.07694	0.853204	-1.26223	0.206866	0.703701	MED24	chr17	1.27603	1.36726	0.562916	0.550545	0.533991	1.79041
ENSG00000008853	716.459	0.561083	0.465326	1.20578	0.227901	0.72499	RHOBTB2	chr8	0.806228	0.943037	2.45018	1.85421	0.922226	2.09924
ENSG00000008869	550.959	-0.157008	0.357394	-0.439315	0.660434	0.945026	HEATR5B	chr2	0.879165	0.723461	0.856483	0.6918	0.896877	0.632778
ENSG00000008952	2958.77	-0.211407	0.354306	-0.596679	0.550722	0.916268	SEC62	chr3	6.9462	12.8054	17.2775	21.0188	7.46625	10.1116
ENSG00000008988	2591.7	-0.0962529	0.478075	-0.201334	0.840437	0.976715	RPS20	chr8	34.2038	51.315	74.5266	25.1759	96.5041	60.9162
ENSG00000009307	66478.8	-0.686054	0.302211	-2.27012	0.0232005	0.292282	CSDE1	chr1	382.408	276.091	234.595	122.458	292.49	115.348
ENSG00000009335	1728.59	0.334367	0.31806	1.05127	0.293134	0.775264	UBE3C	chr7	2.79628	5.33001	2.90201	5.22878	3.79069	6.13493
ENSG00000009413	2531.51	-0.557763	0.305914	-1.82327	0.0682631	0.46158	REV3L	chr6	4.50238	4.58755	4.82537	4.32687	2.84898	3.80234
ENSG00000009694	203.453	-1.31632	0.497491	-2.64592	0.00814692	0.180433	TENM1	chrX	0.357851	0.396146	0.347965	0.120101	0.152636	0.218836
ENSG00000009709	0	NA	NA	NA	NA	NA	PAX7	chr1	0	0	0	0	0	0
ENSG00000009724	4.61427	5.74397	3.91655	1.46659	0.142488	NA	MASP2	chr1	0	0	0	0	0.140893	0
ENSG00000009765	13.3029	-1.87739	3.26059	-0.575781	0.564763	0.921493	IYD	chr6	0	0	0.039722	0	0	0
ENSG00000009780	3700.37	-0.145127	0.330235	-0.439466	0.660324	0.945026	FAM76A	chr1	18.4468	26.1294	16.6309	19.3766	17.6903	25.5377
ENSG00000009790	0	NA	NA	NA	NA	NA	TRAF3IP3	chr1	0.053893	0.015353	0.012063	0.016942	0.021168	0
ENSG00000009830	66.3576	1.04024	1.09089	0.953572	0.3403	0.81313	POMT2	chr14	0.053207	0.187161	0.041182	0.298195	0.062859	0.154611
ENSG00000009844	6770.95	-1.15182	0.351244	-3.27926	0.00104079	0.0609324	VTA1	chr6	28.5948	22.7604	30.796	16.7282	9.53571	12.6333
ENSG00000009950	1575.11	1.12055	0.377695	2.9668	0.00300916	0.112984	MLXIPL	chr7	5.14434	4.80638	3.05083	8.33747	10.3607	11.1328
ENSG00000009954	10316.4	-0.0395399	0.250842	-0.157629	0.87475	0.980494	BAZ1B	chr7	25.5453	29.2995	29.4757	29.5466	33.3785	27.2301
ENSG00000010017	1890.53	-0.349112	0.44215	-0.789579	0.429774	0.869316	RANBP9	chr6	11.3574	14.6067	29.6664	11.6884	19.586	15.9134
ENSG00000010030	30.9762	1.37682	2.55028	0.539869	NA	NA	ETV7	chr6	0	0	0.383537	0.011727	0.772861	0
ENSG00000010072	4357.36	-1.36659	0.375859	-3.6359	0.000277008	0.0279182	SPRTN	chr1	36.9518	31.6228	24.5621	9.55194	15.7264	18.0771
ENSG00000010165	162.594	1.24445	0.78047	1.59449	0.110826	0.555316	METTL13	chr1	0.088541	0.659	0.791547	1.68262	0.802335	1.45963
ENSG00000010219	132.69	1.07468	0.70057	1.53401	0.125027	0.583203	DYRK4	chr12	1.11509	1.8327	1.09891	2.46637	0.488452	3.5088
ENSG00000010244	3839.57	-0.104763	0.358948	-0.29186	0.770394	0.965231	ZNF207	chr17	4.27722	6.8895	24.6023	4.28979	4.366	6.72588
ENSG00000010256	503.072	0.525256	0.613471	0.856204	0.391885	0.846843	UQCRC1	chr3	4.07168	2.19967	1.44862	5.24512	4.74966	2.08504
ENSG00000010270	10810.1	-0.699458	0.33229	-2.10496	0.0352947	0.353258	STARD3NL	chr7	122.243	48.2601	52.0309	61.496	37.118	67.3811
ENSG00000010278	482.347	0.464413	0.752976	0.616769	0.537387	0.912385	CD9	chr12	1.12101	7.64637	1.41855	8.52882	0.839801	4.00862
ENSG00000010282	0.170899	1.08307	4.08047	0.265428	0.79068	NA	HHATL	chr3	0	0	0	0	0.008645	0
ENSG00000010292	701.173	0.304333	0.420879	0.72309	0.469624	0.889426	NCAPD2	chr12	2.45821	1.64108	2.31194	2.30754	4.07896	2.68025
ENSG00000010295	179.126	-0.320773	0.539922	-0.59411	0.552438	0.917139	IFFO1	chr12	0.967958	0.729451	0.655857	0.515568	1.00026	0.394139
ENSG00000010310	0	NA	NA	NA	NA	NA	GIPR	chr19	0	0	0	0	0	0
ENSG00000010318	2411.8	0.209653	0.359339	0.58344	0.559597	0.919247	PHF7	chr3	36.3504	23.6645	26.7416	31.9813	46.9825	32.9246
ENSG00000010319	0.170899	1.08307	4.08047	0.265428	0.79068	NA	SEMA3G	chr3	0	0	0	0	0.00315	0
ENSG00000010322	839.182	0.327631	0.423464	0.773693	0.439112	0.874469	NISCH	chr3	1.53702	1.26738	2.42791	2.78786	3.25882	1.72289
ENSG00000010327	18.1539	-0.0735671	2.09539	-0.0351091	0.971993	0.996639	STAB1	chr3	0	0.0266	0.063125	0.037939	0.071848	0
ENSG00000010361	69.4656	0.12279	1.74688	0.0702909	0.943962	0.991121	FUZ	chr19	1.38984	0.093989	0.055128	0	1.77134	0.703367
ENSG00000010379	0	NA	NA	NA	NA	NA	SLC6A13	chr12	0	0	0	0	0	0
ENSG00000010404	2784.92	-0.0288594	0.434893	-0.0663597	0.947091	0.991723	IDS	chrX	9.9824	5.62278	10.8928	8.20564	7.39	6.56888
ENSG00000010438	0	NA	NA	NA	NA	NA	PRSS3	chr9	0	0	0	0	0.001346	0
ENSG00000010539	4804.8	-0.153262	0.262446	-0.583974	0.559238	0.919247	ZNF200	chr16	34.4869	43.3896	19.4633	28.2343	33.4113	28.3309
ENSG00000010610	0	NA	NA	NA	NA	NA	CD4	chr12	0	0	0	0	0	0
ENSG00000010626	9.99805	6.8601	2.36211	2.90423	0.00368162	0.122899	LRRC23	chr12	0.125372	0	0	0.207184	0.16147	0.048968
ENSG00000010671	3.20514	5.21727	3.92086	1.33065	0.183306	NA	BTK	chrX	0	0	0	0	0	0.064395
ENSG00000010704	18.0731	4.10153	2.98163	1.3756	NA	NA	HFE	chr6	0	0.019742	0	0	0	0.36181
ENSG00000010803	118.136	-0.235766	0.606153	-0.388955	0.69731	0.951021	SCMH1	chr1	0.362103	0.552948	0.878152	0.714249	0.539456	0.355338
ENSG00000010810	1362.02	-0.0600938	0.515288	-0.116622	0.90716	0.986511	FYN	chr6	2.08883	1.22431	10.8928	0.270472	4.20247	3.13977
ENSG00000010818	10.5713	2.09928	2.52606	0.831049	0.405946	0.856196	HIVEP2	chr6	0	0	0.019753	0.109525	0.003001	0.00457
ENSG00000010932	0.489518	-2.4152	3.99051	-0.605236	0.545022	NA	FMO1	chr1	0	0.011312	0	0	0	0
ENSG00000011007	7744.76	0.87979	0.35983	2.44502	0.0144846	0.2356	ELOA	chr1	27.3122	9.99825	22.6571	30.7276	15.9571	45.0051
ENSG00000011009	120.478	1.25435	0.969047	1.29442	0.19552	0.69096	LYPLA2	chr1	1.12116	0.205328	0.110953	1.59421	0.801542	1.51348
ENSG00000011021	228.396	1.57411	0.847872	1.85654	0.0633771	0.448771	CLCN6	chr1	0.368187	0.306216	0.026323	0.888497	0.494527	0.801528
ENSG00000011028	87.5295	-0.391113	0.821374	-0.476169	0.633954	0.937305	MRC2	chr17	0.280819	0.109113	0.36841	0.09618	0.354944	0.242639
ENSG00000011052	0	NA	NA	NA	NA	NA	NME1-NME2	chr17	9.61913	9.61944	18.697	16.63	15.9424	20.7631
ENSG00000011083	0.170899	1.08307	4.08047	0.265428	0.79068	NA	SLC6A7	chr5	0	0	0.001839	0	0.006657	0
ENSG00000011105	417.784	1.31364	0.573533	2.29044	0.0219958	0.284284	TSPAN9	chr12	0.069911	0.05543	1.31798	0.099898	0.224918	0.243639
ENSG00000011114	54.4281	1.14192	1.54996	0.736741	0.46128	0.885738	BTBD7	chr14	0.214539	0.805465	0.219447	1.82041	0.391674	0.587791
ENSG00000011132	75.3788	0.629395	1.57006	0.400874	0.688513	0.948515	APBA3	chr19	0.148678	0.757491	0.028376	0.632234	0	1.63135
ENSG00000011143	218.03	0.459757	0.579299	0.793643	0.427403	0.868832	MKS1	chr17	1.63624	2.09533	0.646372	1.56695	3.64969	4.2213
ENSG00000011198	241.938	-0.126621	0.671047	-0.188692	0.850334	0.977784	ABHD5	chr3	0.242997	0.342281	4.02962	3.76746	0.425969	0.154258
ENSG00000011201	261.115	0.0747007	0.588763	0.126877	0.899037	0.984478	ANOS1	chrX	0.498325	0.620453	0.629757	0.950466	1.33247	0.298152
ENSG00000011243	51.2955	-0.474088	1.1273	-0.420553	0.674081	0.945891	AKAP8L	chr19	0.436792	0.073237	0.387587	0.071268	0.182668	1.62915
ENSG00000011258	865.474	-0.602537	0.374847	-1.60742	0.107962	0.549799	MBTD1	chr17	3.7646	2.77105	2.87277	2.01119	1.18906	2.43991
ENSG00000011260	174.072	0.454836	0.732061	0.621309	0.534397	0.912318	UTP18	chr17	0.730809	1.15992	1.42705	3.80489	1.4162	0.361362
ENSG00000011275	11988.3	-0.413652	0.344931	-1.19923	0.230438	0.727024	RNF216	chr7	44.3514	39.7364	32.3908	26.5203	40.8468	31.2923
ENSG00000011295	74.059	-0.814671	0.764206	-1.06604	0.286407	0.772877	TTC19	chr17	0.126985	0.400411	0.410252	0.271103	0.442791	1.08174
ENSG00000011304	3949.7	0.579143	0.403309	1.43598	0.151008	0.626344	PTBP1	chr19	12.5127	20.7384	19.5176	19.5304	33.6297	24.2794
ENSG00000011332	1774.64	0.279057	0.396964	0.702976	0.48207	0.892872	DPF1	chr19	7.55875	3.23144	10.3786	4.91542	8.76209	7.17062
ENSG00000011347	33.4713	1.92443	1.14385	1.68241	0.0924889	0.51631	SYT7	chr11	0.044427	0.04131	0.033049	0.025484	0.203305	0.277485
ENSG00000011376	1719.61	-0.272691	0.293298	-0.92974	0.352506	0.821891	LARS2	chr3	5.33316	5.07417	4.81116	5.25437	4.77599	5.12256
ENSG00000011405	10242.8	-0.310688	0.302494	-1.02709	0.304379	0.784929	PIK3C2A	chr11	10.4886	17.3499	14.175	11.645	14.3983	12.2092
ENSG00000011422	66.8505	0.68468	0.928192	0.737649	0.460728	0.885496	PLAUR	chr19	0.119835	0.015735	0.135909	0.666325	0.171851	0.123744
ENSG00000011426	9082.86	-0.799998	0.285574	-2.80137	0.00508856	0.14584	ANLN	chr7	21.8564	51.6235	41.1953	17.6091	24.3178	24.8373
ENSG00000011451	780.168	0.895836	0.552703	1.62083	0.105054	0.545886	WIZ	chr19	0.594703	1.82112	1.5994	1.51157	2.87659	3.77543
ENSG00000011454	5790.02	-0.999907	0.297563	-3.36032	0.000778516	0.0506366	RABGAP1	chr9	3.57188	11.0914	8.60193	2.13132	1.86897	1.33525
ENSG00000011465	54.388	7.52396	1.75026	4.29876	1.72e-05	0.00541505	DCN	chr12	0	0.001289	0.001192	0.043946	0.029137	0.301659
ENSG00000011478	86.4028	1.21993	1.05135	1.16034	0.245911	0.741504	QPCTL	chr19	0.890726	0.033996	0.227234	1.58058	1.03399	0.794742
ENSG00000011485	116.534	-1.00562	0.76338	-1.31733	0.187728	0.682124	PPP5C	chr19	1.31697	4.29216	0.630601	2.59483	0.290784	0.317276
ENSG00000011523	1443.4	-0.361264	0.41166	-0.877578	0.380173	0.839947	CEP68	chr2	6.23395	2.33507	4.70741	4.12692	3.8985	2.2639
ENSG00000011566	1459.96	0.14059	0.459307	0.306091	0.759535	0.962395	MAP4K3	chr2	1.50931	3.38384	4.43546	2.79584	4.29331	3.55237
ENSG00000011590	0.153734	-0.840481	4.08047	-0.205976	0.836809	NA	ZBTB32	chr19	0	0	0.011427	0	0	0
ENSG00000011600	0	NA	NA	NA	NA	NA	TYROBP	chr19	0	0	0	0	0	0
ENSG00000011638	10.7112	-0.227191	2.05556	-0.110525	0.911993	0.987654	TMEM159	chr16	0.045774	0.208167	0.01328	0.142568	0.102502	0
ENSG00000011677	0.307468	-1.72095	4.04114	-0.425857	0.670212	NA	GABRA3	chrX	0	0	0.004576	0	0	0
ENSG00000012048	8159.35	-0.544403	0.312158	-1.744	0.0811595	0.4929	BRCA1	chr17	71.6148	52.4112	31.2763	22.5954	32.6523	19.9728
ENSG00000012061	76.388	0.0610429	0.676241	0.090268	0.928074	0.989267	ERCC1	chr19	0.33168	1.27655	0.447291	1.37354	0.822682	0.761023
ENSG00000012124	0	NA	NA	NA	NA	NA	CD22	chr19	0	0	0	0	0	0
ENSG00000012171	3.68001	4.39342	3.65831	1.20094	0.229773	NA	SEMA3B	chr3	0	0	0.00589	0.014233	0	0.066659
ENSG00000012174	182.235	-0.0667465	0.512725	-0.13018	0.896424	0.983577	MBTPS2	chrX	0.795749	1.43965	1.05617	1.11234	0.893423	1.83327
ENSG00000012211	13.0828	1.28055	2.24523	0.570342	0.568446	0.922422	PRICKLE3	chrX	0	0.143293	0.09415	0.193356	0	0.155041
ENSG00000012223	0	NA	NA	NA	NA	NA	LTF	chr3	0	0	0	0	0	0
ENSG00000012232	1675.48	0.575746	0.444309	1.29582	0.195036	0.690017	EXTL3	chr8	0.369078	2.61709	2.67145	0.681415	8.00917	1.36138
ENSG00000012504	1599.27	0.574255	0.564463	1.01735	0.308988	0.789651	NR1H4	chr12	1.37603	5.06176	5.25848	4.19571	9.84501	5.4079
ENSG00000012660	3157.87	-0.337092	0.378255	-0.891176	0.372835	0.836056	ELOVL5	chr6	24.5788	12.5986	15.6128	9.11765	8.84639	9.34147
ENSG00000012779	3.53242	5.35975	3.91954	1.36745	0.171486	NA	ALOX5	chr10	0	0.000276	0	0.163187	0	0
ENSG00000012817	0.614937	-2.71855	3.97481	-0.683945	0.49401	NA	KDM5D	chrY	0	0	0.014384	0	0	0
ENSG00000012822	361.675	0.556664	0.506091	1.09993	0.271363	0.760229	CALCOCO1	chr12	0.941975	0.612071	0.419507	1.07676	1.03498	0.802271
ENSG00000012963	464.799	0.667875	0.628988	1.06182	0.288316	0.773506	UBR7	chr14	8.12313	4.8252	3.38904	15.3775	10.6632	5.27574
ENSG00000012983	1661.57	-0.354622	0.318725	-1.11263	0.265869	0.756288	MAP4K5	chr14	5.47441	10.1819	4.60243	2.9806	4.04935	4.05629
ENSG00000013016	70.6237	-0.70127	1.0193	-0.68799	0.491459	0.894425	EHD3	chr2	0.129425	0.296248	0.629573	0.521509	0.051576	0.100692
ENSG00000013275	3378.23	0.24278	0.293026	0.828529	0.407371	0.857498	PSMC4	chr19	28.3942	24.3381	23.1024	32.5782	31.4808	35.0223
ENSG00000013288	57.8652	2.5087	0.993064	2.52622	0.0115298	0.212545	MAN2B2	chr4	0.03232	0.068872	0.022792	0.121148	0.115635	0.422223
ENSG00000013293	0	NA	NA	NA	NA	NA	SLC7A14	chr3	0	0	0.001306	0	0.001195	0
ENSG00000013297	9.25888	3.04415	2.43965	1.24778	0.212111	0.708098	CLDN11	chr3	0.00092	0.0024	0.003475	0.004985	0.000895	0.002748
ENSG00000013306	951.946	1.20784	0.558893	2.16113	0.0306849	0.331487	SLC25A39	chr17	2.68167	7.10798	3.93053	30.3382	4.0843	4.5949
ENSG00000013364	18650.6	0.692751	0.39867	1.73765	0.0822716	0.497053	MVP	chr16	90.0332	70.4173	91.0255	25.5215	60.1202	48.9336
ENSG00000013374	1152.13	0.489507	0.360279	1.35869	0.174245	0.663638	NUB1	chr7	4.29706	4.61578	2.71846	5.26978	6.22888	4.62729
ENSG00000013375	689.077	-0.0581682	0.38641	-0.150535	0.880343	0.981183	PGM3	chr6	1.65452	2.56627	2.15558	2.33546	1.65402	2.38844
ENSG00000013392	32.7595	1.61949	2.39513	0.676159	0.498939	0.896302	RWDD2A	chr6	0	0.142775	0.105484	0.844885	0	0
ENSG00000013441	8019.93	-0.121099	0.294183	-0.411645	0.680599	0.94725	CLK1	chr2	45.1965	47.588	46.2742	38.9552	50.551	31.7767
ENSG00000013503	1110.64	-0.521741	0.402754	-1.29543	0.195171	0.690182	POLR3B	chr12	1.49585	1.40894	1.02855	1.22324	0.999873	0.778019
ENSG00000013523	191.855	-0.134224	0.631072	-0.212693	0.831567	0.975074	ANGEL1	chr14	1.0075	0.379958	0.908694	0.640445	1.43789	1.10272
ENSG00000013561	17126.9	-0.108311	0.298312	-0.363081	0.716545	0.953669	RNF14	chr5	73.9425	64.3971	71.2278	63.6781	44.267	36.3593
ENSG00000013563	1.93437	3.40666	3.93212	0.866369	0.386288	NA	DNASE1L1	chrX	0	0	0.00044	0	0	0.175416
ENSG00000013573	433.381	-0.213993	0.508691	-0.420674	0.673993	0.945891	DDX11	chr12	2.41182	1.18684	0.669926	1.11438	0.622407	1.2256
ENSG00000013583	44.8416	0.379593	0.846138	0.448618	0.653707	0.943247	HEBP1	chr12	0.087714	0.104721	0.961679	1.10585	0.130913	0.215881
ENSG00000013588	82.3522	-0.185165	3.7272	-0.0496793	NA	NA	GPRC5A	chr12	0	0.437505	0	0.213352	0.015618	0
ENSG00000013619	29.0262	-0.0498476	2.13378	-0.0233611	0.981362	0.997476	MAMLD1	chrX	0	0.015156	0.001638	0.009183	0.009803	0.006881
ENSG00000013725	0	NA	NA	NA	NA	NA	CD6	chr11	0	0	0	0	0	0
ENSG00000013810	66774	0.970258	0.510612	1.90019	0.0574085	0.429804	TACC3	chr4	383.599	300.425	94.0219	410.246	281.059	528.732
ENSG00000014123	10548.7	-0.153442	0.295072	-0.520015	0.603053	0.931271	UFL1	chr6	45.4295	47.3479	47.3288	37.3101	45.5099	54.3721
ENSG00000014138	438.878	0.605856	0.463979	1.30578	0.191626	0.686348	POLA2	chr11	1.00042	0.951201	2.35894	2.33731	1.31854	2.32195
ENSG00000014164	5428.53	-0.236559	0.383684	-0.616545	0.537535	0.912385	ZC3H3	chr8	5.55383	10.1224	5.18537	2.88023	4.56008	5.74544
ENSG00000014216	88.5008	0.496398	1.29674	0.382804	0.701865	0.951842	CAPN1	chr11	0	0.607394	0.387957	0.479095	0.108837	0.383679
ENSG00000014257	43.8005	8.99073	2.03787	4.41182	1.03e-05	0.0039812	ACPP	chr3	0	0	0	0.424152	0.008156	0.899864
ENSG00000014641	11341.6	0.479675	0.430562	1.11407	0.26525	0.756288	MDH1	chr2	48.4637	131.857	43.7699	53.4564	43.6609	40.117
ENSG00000014824	475.127	0.0698574	0.45213	0.154507	0.87721	0.980974	SLC30A9	chr4	1.34121	0.591453	1.4839	1.44737	1.04453	1.39123
ENSG00000014914	54.6927	-2.28545	0.914151	-2.50008	0.0124164	0.218716	MTMR11	chr1	0.711485	0.14122	0.573001	0.097454	0.032422	0.054759
ENSG00000014919	251.067	0.404892	0.481789	0.840393	0.400688	0.852978	COX15	chr10	0.835329	0.437484	1.5343	1.31909	1.04294	0.731792
ENSG00000015133	6885.03	-0.22815	0.57756	-0.395024	0.692825	0.94969	CCDC88C	chr14	8.06785	4.22382	2.3039	4.38432	2.89626	4.72918
ENSG00000015153	325.2	0.227686	0.488942	0.465669	0.641452	0.939771	YAF2	chr12	1.92538	4.99451	2.46655	3.33349	3.18334	3.25409
ENSG00000015171	1526.72	-0.364151	0.290241	-1.25465	0.209605	0.705606	ZMYND11	chr10	1.70565	8.81688	6.40905	6.49317	6.44884	4.60706
ENSG00000015285	7.48544	0.740621	2.19569	0.337307	0.735885	NA	WAS	chrX	0	0.095275	0.154418	0.017153	0.179747	0.148178
ENSG00000015413	965.066	0.173929	0.537352	0.323679	0.746181	0.959031	DPEP1	chr16	1.17803	0.819447	0.965479	2.35449	0.555208	1.02523
ENSG00000015475	125.701	1.36539	0.756377	1.80517	0.0710475	0.471008	BID	chr22	0.108492	0.32967	0.438675	0.890621	1.23587	0.361868
ENSG00000015479	4.96848	3.46821	2.51099	1.38121	0.167213	NA	MATR3	chr5	4.64344	5.96073	3.40284	7.18656	2.0808	1.23284
ENSG00000015520	0	NA	NA	NA	NA	NA	NPC1L1	chr7	0	0	0	0	0	0
ENSG00000015532	59.2062	0.553144	1.40557	0.393538	0.693922	0.94971	XYLT2	chr17	0.109495	0.336027	0.17154	0.317194	0.602834	0
ENSG00000015568	7.08786	0.66098	1.72573	0.383015	0.701709	NA	RGPD5	chr2	1.62189	2.0258	2.71839	6.47421	2.06549	1.86059
ENSG00000015592	1.03256	3.5833	3.95035	0.907084	0.364362	NA	STMN4	chr8	0	0	0	0	0.031059	0.01295
ENSG00000015676	863.546	-0.0261294	0.338425	-0.0772088	0.938457	0.990285	NUDCD3	chr7	2.32073	1.19069	2.0267	2.18207	2.16012	1.71578
ENSG00000016082	1684.99	0.148747	0.369056	0.403047	0.686914	0.948515	ISL1	chr5	9.79683	6.96404	6.72741	19.8152	9.59176	7.21811
ENSG00000016391	45.2662	0.778831	1.18749	0.655864	0.511911	0.901102	CHDH	chr3	0.089224	0.02896	0.156126	0.276	0.082688	0.079819
ENSG00000016402	15.5246	-2.94389	2.32104	-1.26835	0.204674	0.701212	IL20RA	chr6	0	0.140722	0.009659	0.018307	0	0.004056
ENSG00000016490	0.170899	1.08307	4.08047	0.265428	0.79068	NA	CLCA1	chr1	0	0	0	0	0.007833	0
ENSG00000016602	0	NA	NA	NA	NA	NA	CLCA4	chr1	0	0	0	0	0	0
ENSG00000016864	1825.09	0.101209	0.477691	0.21187	0.832208	0.975074	GLT8D1	chr3	5.94034	7.08429	6.50091	10.187	5.28401	6.41186
ENSG00000017260	3411.66	-0.584282	0.410303	-1.42403	0.154439	0.632702	ATP2C1	chr3	1.46671	1.3667	2.58083	1.29602	0.997978	1.73086
ENSG00000017427	0	NA	NA	NA	NA	NA	IGF1	chr12	0	0	0.004201	0	0	0
ENSG00000017483	0	NA	NA	NA	NA	NA	SLC38A5	chrX	0	0	0	0	0	0
ENSG00000017797	1780.51	-0.2719	0.463834	-0.586201	0.557741	0.919068	RALBP1	chr18	4.64437	1.24814	10.4761	0.520791	0.758962	2.6532
ENSG00000018189	760.566	0.32789	0.444654	0.737404	0.460876	0.885535	RUFY3	chr4	2.45021	1.20581	1.17579	0.790635	5.71109	1.96448
ENSG00000018236	70.4941	1.06147	1.32357	0.801974	0.422568	0.865909	CNTN1	chr12	0.007098	0.022098	0.004804	0.030092	0.00434	0.018993
ENSG00000018280	0.331798	0.1213	4.08047	0.0297269	0.976285	NA	SLC11A1	chr2	0	0	0.002108	0	0	0.004917
ENSG00000018408	234.186	0.767443	0.668826	1.14745	0.251196	0.747617	WWTR1	chr3	0.464269	0.22298	0.47362	0.480448	0.270566	1.351
ENSG00000018510	1458.18	-0.690318	0.290203	-2.37874	0.0173719	0.255901	AGPS	chr2	3.30749	3.83576	4.39983	2.95715	2.70014	2.44998
ENSG00000018607	0	NA	NA	NA	NA	NA	ZNF806	chr2	0	0	0	0	0	0
ENSG00000018610	4662.52	0.543117	0.297	1.82868	0.0674477	0.460565	CXorf56	chrX	29.9729	23.885	26.4003	52.6708	41.2369	39.575
ENSG00000018625	1.27058	-1.49704	3.68456	-0.406301	0.684521	NA	ATP1A2	chr1	0.00465	0.004102	0.010067	0.004962	0.002873	0
ENSG00000018699	57.0619	-0.622081	1.25816	-0.494439	0.620996	0.935045	TTC27	chr2	0.147231	0.147985	0.92381	0.720473	0.155836	0.024278
ENSG00000018869	90.5753	0.0809428	0.716233	0.113012	0.910021	0.987205	ZNF582	chr19	0.240802	0.316659	0.659179	0.88541	0.181568	0.158799
ENSG00000019102	0	NA	NA	NA	NA	NA	VSIG2	chr11	0	0	0	0	0	0
ENSG00000019144	317.539	1.00222	0.66343	1.51066	0.130875	0.592398	PHLDB1	chr11	0.427172	0.224804	0.387657	0.533258	1.24289	2.30008
ENSG00000019169	0	NA	NA	NA	NA	NA	MARCO	chr2	0	0	0	0	0	0
ENSG00000019186	798.453	-0.538672	0.375301	-1.43531	0.151199	0.626344	CYP24A1	chr20	5.66957	3.21249	3.87866	3.44356	3.03886	3.01507
ENSG00000019485	9.1775	1.21039	3.53002	0.342885	0.731685	0.956549	PRDM11	chr11	0	0.001143	0.008564	0	0	0.015857
ENSG00000019505	3.40081	4.27521	3.92067	1.09043	0.275525	NA	SYT13	chr11	0	0	0.00615	0	0.075405	0
ENSG00000019549	0.866526	-1.96182	3.96588	-0.494674	0.62083	NA	SNAI2	chr8	0	0.025416	0.046447	0.007737	0	0
ENSG00000019582	12.0139	1.15455	2.24932	0.513287	0.60775	0.931914	CD74	chr5	0	0.056272	0.070482	0.082588	0	0.200184
ENSG00000019991	7.19393	0.64916	2.52971	0.256614	0.797477	NA	HGF	chr7	0	0	0.011015	0	0.010337	0
ENSG00000019995	402.547	0.28429	0.444255	0.639925	0.522222	0.906459	ZRANB1	chr10	1.73847	3.63713	1.85773	3.57979	3.6837	3.05911
ENSG00000020129	221.33	-0.0796152	0.843471	-0.09439	0.924799	0.988668	NCDN	chr1	1.91138	0.448144	0.89432	0.684228	1.86218	0.226536
ENSG00000020181	0.621767	-1.34262	3.9971	-0.3359	0.736947	NA	ADGRA2	chr8	0.002087	0.005744	0.020498	0.011875	0.020778	0.008763
ENSG00000020219	0	NA	NA	NA	NA	NA	CCT8L1P	chr7	0	0	0	0	0	0
ENSG00000020256	641.647	-0.28401	0.409448	-0.693641	0.487907	0.894357	ZFP64	chr20	4.24906	2.85211	0.643376	3.5025	0.447727	4.70798
ENSG00000020426	1296.27	-0.32227	0.498155	-0.646927	0.517679	0.904414	MNAT1	chr14	9.78735	22.7258	14.1256	17.3192	16.6045	13.2137
ENSG00000020577	5027.7	-0.387555	0.263749	-1.46941	0.141722	0.608623	SAMD4A	chr14	6.56836	8.061	1.61731	1.42083	3.04079	7.16787
ENSG00000020633	0	NA	NA	NA	NA	NA	RUNX3	chr1	0	0	0	0	0	0
ENSG00000020922	3372.03	-0.349437	0.345673	-1.01089	0.31207	0.791347	MRE11	chr11	7.01245	8.60808	5.31387	6.88193	5.24334	5.86193
ENSG00000021300	1612.96	0.278797	0.307558	0.906487	0.364678	0.830329	PLEKHB1	chr11	13.2787	11.771	9.34586	16.7663	13.7651	15.3232
ENSG00000021355	172.246	0.695808	2.86958	0.242477	0.80841	0.972223	SERPINB1	chr6	0	1.5934	1.05421	1.98356	0	2.23971
ENSG00000021461	1.84481	-4.30139	3.92966	-1.0946	0.273693	NA	CYP3A43	chr7	0	0	0.065964	0	0	0
ENSG00000021488	8133.54	-0.399929	0.444422	-0.899885	0.368182	0.832565	SLC7A9	chr19	95.8445	85.1101	40.9815	83.5955	52.036	55.071
ENSG00000021574	2854.91	0.0207762	0.33994	0.0611172	0.951266	0.992723	SPAST	chr2	8.56677	8.45277	12.8473	14.3346	10.4846	9.77423
ENSG00000021645	1037.29	0.0790066	0.291287	0.271233	0.786212	0.969546	NRXN3	chr14	0.044944	0.043259	0.048051	0.047128	0.057704	0.266616
ENSG00000021762	1346.3	0.261821	0.427197	0.612881	0.539955	0.912764	OSBPL5	chr11	1.91455	0.946401	3.21433	2.06745	1.8814	1.45
ENSG00000021776	1850.81	-0.408744	0.336248	-1.2156	0.224136	0.723138	AQR	chr15	3.86609	2.71629	3.67053	2.63506	3.17696	2.13735
ENSG00000021826	5983.36	-0.892261	0.412625	-2.1624	0.0305872	0.331115	CPS1	chr2	9.4535	4.36703	29.5093	4.58283	6.02629	4.62453
ENSG00000021852	0	NA	NA	NA	NA	NA	C8B	chr1	0	0	0	0	0	0
ENSG00000022267	14.6045	-2.53056	1.9453	-1.30086	0.193306	0.688022	FHL1	chrX	0.076355	0.006831	0	0.003789	0.001767	0.045291
ENSG00000022277	707.603	0.585991	0.34589	1.69416	0.0902357	0.513473	RTFDC1	chr20	2.8742	4.06192	7.86751	5.23372	4.9331	6.32165
ENSG00000022355	0.478367	-0.759168	4.04114	-0.18786	0.850987	NA	GABRA1	chr5	0	0	0.006012	0	0.002108	0
ENSG00000022556	14739	-0.699352	0.465909	-1.50105	0.133343	0.59694	NLRP2	chr19	49.281	69.5032	55.055	42.3251	82.1382	32.1245
ENSG00000022567	185.572	1.65292	0.527604	3.13288	0.00173098	0.0817924	SLC45A4	chr8	0.040507	0.045532	0.088743	0.170661	0.186168	0.219921
ENSG00000022840	30597.4	-0.117672	0.32215	-0.365272	0.714908	0.953669	RNF10	chr12	146.519	79.5952	107.334	93.4084	122.9	170.529
ENSG00000022976	139.798	0.479679	0.651326	0.736464	0.461448	0.885954	ZNF839	chr14	0.317146	0.121751	0.324524	0.495453	0.322573	0.351703
ENSG00000023041	624.657	-0.445692	0.541132	-0.823629	0.41015	0.858752	ZDHHC6	chr10	7.35642	1.17804	4.13915	4.6876	2.07187	1.77903
ENSG00000023171	244.168	2.68881	2.93468	0.916219	0.359552	0.826669	GRAMD1B	chr11	0	0.172874	0.011007	0.2125	0	0.422454
ENSG00000023191	987.358	1.55329	0.361516	4.29661	1.73e-05	0.00541505	RNH1	chr11	5.35716	2.47292	2.24843	11.5983	13.3853	14.357
ENSG00000023228	466.857	-0.238317	0.486206	-0.490156	0.624024	0.936409	NDUFS1	chr2	0.885671	0.5524	1.44269	0.770153	0.711145	0.897444
ENSG00000023287	8807.21	-0.154745	0.381993	-0.4051	0.685404	0.948129	RB1CC1	chr8	14.5895	26.698	29.5421	15.8468	25.0798	27.337
ENSG00000023318	12342.9	-0.578482	0.329918	-1.75341	0.0795317	0.490911	ERP44	chr9	65.7107	58.4244	42.702	52.5729	35.1213	40.103
ENSG00000023330	11249	-0.355986	0.356609	-0.998251	0.318158	0.79647	ALAS1	chr3	133.668	90.3577	70.8541	105.427	73.2406	88.6501
ENSG00000023445	94.9487	-0.838157	0.926259	-0.904885	0.365527	0.831141	BIRC3	chr11	0.06283	0.517359	0.325562	0.107555	0.369719	0.116138
ENSG00000023516	10445	-0.766496	0.289127	-2.65106	0.00802386	0.179993	AKAP11	chr13	21.7912	25.7178	25.5959	20.0367	16.476	12.5495
ENSG00000023572	19.3105	-0.650171	2.55474	-0.254496	0.799113	0.971676	GLRX2	chr1	0	0.473799	1.3563	0	0.651896	0
ENSG00000023608	3160.42	-0.403001	0.366717	-1.09894	0.271793	0.761041	SNAPC1	chr14	68.9284	86.629	109.406	86.8886	82.6549	82.9695
ENSG00000023697	4403.21	-0.220395	0.406816	-0.541757	0.587986	0.927497	DERA	chr12	26.7776	31.596	17.6919	31.5426	1.22886	2.71802
ENSG00000023734	24303.2	0.0731855	0.384262	0.190457	0.848951	0.977681	STRAP	chr12	313.094	149.688	220.928	342.269	252.556	256.231
ENSG00000023839	7.11612	0.920613	3.73678	0.246365	0.805399	NA	ABCC2	chr10	0	0	0.005433	0.093626	0	0
ENSG00000023892	3.21129	5.22236	3.92081	1.33196	0.182873	NA	DEF6	chr6	0	0	0	0.161884	0	0
ENSG00000023902	132.913	1.82891	0.845636	2.16276	0.0305595	0.33104	PLEKHO1	chr1	0.032462	0.329523	0.218611	0.712078	2.00687	1.28651
ENSG00000023909	4940.71	0.0788859	0.345014	0.228645	0.819145	0.973714	GCLM	chr1	24.3335	14.7462	15.6471	22.8637	30.2213	24.0926
ENSG00000024048	6322.55	-0.498952	0.290545	-1.71729	0.0859255	0.505645	UBR2	chr6	16.6357	12.7755	18.5659	14.1009	12.2113	11.5879
ENSG00000024422	130.362	1.46591	0.968331	1.51385	0.130063	0.591692	EHD2	chr19	0.029906	0.579335	0.089862	0.956827	0.578476	0.60498
ENSG00000024526	49.4818	1.4126	1.80589	0.782219	0.434086	0.871126	DEPDC1	chr1	0.028999	0.113983	0.145735	1.08246	0.007402	0
ENSG00000024862	9293.45	0.093456	0.366419	0.255052	0.798683	0.971524	CCDC28A	chr6	93.9231	81.6348	194.808	144.948	146.83	132.524
ENSG00000025039	19.6938	-0.639421	2.16007	-0.296018	NA	NA	RRAGD	chr6	0	0	0.267309	0.048694	0.057055	0.033164
ENSG00000025156	220.824	-0.0542016	0.574067	-0.0944168	0.924778	0.988668	HSF2	chr6	2.21066	1.37522	1.07074	3.85835	0.779665	1.32704
ENSG00000025293	4245.3	-0.154916	0.309795	-0.50006	0.617033	0.934607	PHF20	chr20	9.43801	5.68013	18.7274	5.42038	3.83775	5.30711
ENSG00000025423	138.683	0.339534	1.29444	0.262303	0.793088	0.971524	HSD17B6	chr12	0.173871	0.121658	0.21885	0.827435	0.22075	0
ENSG00000025434	48.6135	-1.64555	0.83198	-1.97787	0.0479436	0.397632	NR1H3	chr11	1.08952	0.833806	0.490839	0.524348	0.165029	0.608548
ENSG00000025708	5.3064	0.795688	2.76956	0.287298	0.773884	NA	TYMP	chr22	0	0.046004	0.037077	0.024038	0.14918	0
ENSG00000025770	29.3002	0.498048	1.18699	0.419589	0.674786	0.945891	NCAPH2	chr22	0.121909	0.246717	0.144211	0.287305	0.0415	0.351724
ENSG00000025772	1201.03	0.432703	0.541981	0.798372	0.424655	0.867074	TOMM34	chr20	13.9114	5.58214	7.36829	23.8178	10.1503	8.17122
ENSG00000025796	1961.36	-0.562586	0.380068	-1.48022	0.138814	0.604708	SEC63	chr6	5.77745	5.51977	4.8768	2.72504	3.857	4.6269
ENSG00000025800	2572.42	-0.164759	0.376293	-0.437846	0.661498	0.945149	KPNA6	chr1	3.64973	1.99408	2.84731	3.01769	3.63651	2.0332
ENSG00000026025	1988.09	0.516519	1.35709	0.380607	0.703495	0.952867	VIM	chr10	0.641674	49.958	21.433	5.55523	79.8887	16.5679
ENSG00000026036	0	NA	NA	NA	NA	NA	RTEL1-TNFRSF6B	chr20	0.68767	0.182755	0.24861	0.365441	0.28299	0.184776
ENSG00000026103	0.170899	1.08307	4.08047	0.265428	0.79068	NA	FAS	chr10	0	0	0	0	0.000379	0
ENSG00000026297	313.729	-0.106037	0.981081	-0.108081	0.913931	0.987912	RNASET2	chr6	8.50074	17.883	13.671	10.4642	4.54178	3.73859
ENSG00000026508	52.9557	-1.44186	1.50562	-0.957658	0.338235	0.811642	CD44	chr11	0.008353	0.31092	0.304932	0.043015	0.15853	0.004215
ENSG00000026559	1.9412	4.49346	3.93002	1.14337	0.252885	NA	KCNG1	chr20	0	0	0	0.007588	0	0.039229
ENSG00000026652	336.649	0.340038	0.430679	0.789539	0.429797	0.869316	AGPAT4	chr6	1.24456	0.990114	1.23935	1.1366	1.78428	2.85201
ENSG00000026751	0	NA	NA	NA	NA	NA	SLAMF7	chr1	0	0	0	0	0	0
ENSG00000026950	14.2451	20.7453	3.48541	5.95204	NA	NA	BTN3A1	chr6	0	0	0.001011	0	0	0.307377
ENSG00000027001	2009.66	-0.250101	0.416519	-0.600455	0.548203	0.915412	MIPEP	chr13	19.5695	1.89813	11.6347	3.39331	2.57454	1.50641
ENSG00000027075	626.098	-0.159758	0.50049	-0.319202	0.749573	0.960443	PRKCH	chr14	0.524612	0.349086	0.151248	1.50075	0.042394	1.83648
ENSG00000027644	0.683595	2.98859	3.97241	0.752337	0.451848	NA	INSRR	chr1	0	0	0	0	0.017162	0
ENSG00000027697	893.486	-0.2144	0.542477	-0.395225	0.692677	0.94969	IFNGR1	chr6	6.05763	6.86587	9.31887	12.3593	5.45264	2.62706
ENSG00000027847	82.4747	-0.414919	1.26714	-0.327447	0.74333	0.959031	B4GALT7	chr5	0.639992	0.01135	0.940788	0.835759	0.962818	0.069437
ENSG00000027869	0.153734	-0.840481	4.08047	-0.205976	0.836809	NA	SH2D2A	chr1	0	0	0.004025	0	0	0
ENSG00000028116	318.042	-0.539422	0.54101	-0.997065	0.318733	0.797006	VRK2	chr2	1.79055	1.72123	3.80216	1.99487	0.626769	1.34474
ENSG00000028137	188.984	0.623151	0.878406	0.709412	0.478069	0.891896	TNFRSF1B	chr1	1.19283	0.819487	0.152414	0.877961	2.54197	0.415956
ENSG00000028203	533.471	0.35716	0.575468	0.620642	0.534835	0.912318	VEZT	chr12	0.38979	0.606812	1.09449	0.366158	1.09653	0.507181
ENSG00000028277	227.46	0.160343	0.576684	0.278043	0.780979	0.968164	POU2F2	chr19	1.20426	0.223954	1.34496	1.97786	2.17056	0.691746
ENSG00000028310	51.6514	0.346044	0.92616	0.373633	0.708677	0.953059	BRD9	chr5	0.008753	0.089336	0.15613	0.118959	0.091513	0.04722
ENSG00000028528	692.113	0.145533	0.420984	0.345698	0.72957	0.956058	SNX1	chr15	0.581882	0.868239	0.681037	0.789547	0.922778	0.512706
ENSG00000028839	57053.5	-0.546685	0.379228	-1.44157	0.149423	0.622705	TBPL1	chr6	225.412	763.345	318.116	372.75	303.913	538.32
ENSG00000029153	120.679	0.0856236	0.978167	0.0875347	0.930247	0.989667	ARNTL2	chr12	0.281761	0.589875	0.107857	0.690645	0.461002	0.048073
ENSG00000029363	4297.95	-0.444709	0.302884	-1.46825	0.142037	0.609036	BCLAF1	chr6	12.9858	11.3749	13.5062	10.92	12.9288	7.7491
ENSG00000029364	115.728	1.32259	1.43942	0.918837	0.358181	0.825388	SLC39A9	chr14	0.001326	0.117071	0.008574	1.92019	0.011038	0.064475
ENSG00000029534	108.963	-0.211204	1.22781	-0.172017	0.863424	0.979848	ANK1	chr8	0.277184	0.000567	0.19804	0.46015	0.08247	0.049747
ENSG00000029559	0	NA	NA	NA	NA	NA	IBSP	chr4	0	0	0	0	0	0
ENSG00000029639	204.011	-0.215621	0.629001	-0.342799	0.73175	0.956549	TFB1M	chr6	0.683404	0.141573	2.53568	0.785722	4.44468	0.085642
ENSG00000029725	12536.4	-0.377504	0.299941	-1.25859	0.208178	0.703923	RABEP1	chr17	105.655	148.41	133.789	97.8186	34.0158	113.396
ENSG00000029993	32129.5	-0.132087	0.380055	-0.347548	0.728179	0.955971	HMGB3	chrX	253.336	120.767	135.15	210.117	147.284	119.722
ENSG00000030066	1625.08	-0.130555	0.520812	-0.250676	0.802064	0.972147	NUP160	chr11	5.36197	2.22033	4.07683	6.40674	3.11649	2.25032
ENSG00000030110	0.478367	-0.759168	4.04114	-0.18786	0.850987	NA	BAK1	chr6	0	0	0.061585	0	0.019756	0
ENSG00000030304	2.92017	-0.214561	3.22307	-0.0665704	0.946924	NA	MUSK	chr9	0	0	0.007349	0	0	0
ENSG00000030419	6.59349	6.25972	3.61741	1.73044	0.0835512	NA	IKZF2	chr2	0	0	0	0.039114	0.002263	0.004969
ENSG00000030582	7430.18	-0.703784	0.560057	-1.25663	0.208888	0.704583	GRN	chr17	89.3993	35.1146	19.6761	39.3519	29.1889	48.9626
ENSG00000031003	370.456	-0.687226	0.788696	-0.871345	0.383566	0.841729	FAM13B	chr5	1.07651	1.215	0.258315	1.01866	0.719913	0.276207
ENSG00000031081	0.820322	3.25499	3.96142	0.821673	0.411263	NA	ARHGAP31	chr3	0	0	0.001951	0.001653	0	9e-06
ENSG00000031691	723.759	0.00826602	0.465535	0.017756	0.985834	0.998331	CENPQ	chr6	4.05192	7.96608	10.7867	7.49415	11.8841	6.77412
ENSG00000031698	1135.08	0.00880675	0.331539	0.0265632	0.978808	0.99668	SARS	chr1	12.5197	9.61759	9.13451	8.74987	6.79148	12.1421
ENSG00000031823	494.754	-0.0161006	0.528454	-0.0304673	0.975694	0.996639	RANBP3	chr19	3.24945	2.64842	1.0051	4.47579	1.19441	2.60987
ENSG00000032219	9468.76	-0.37167	0.300399	-1.23725	0.215993	0.712193	ARID4A	chr14	7.63857	10.5854	11.0335	9.39164	10.1641	6.59929
ENSG00000032389	3499.55	0.298878	0.450514	0.663416	0.507064	0.899536	EIPR1	chr2	5.70722	6.48281	1.88959	9.70221	6.53699	13.8964
ENSG00000032444	35.281	1.50147	1.17046	1.2828	0.199561	0.693845	PNPLA6	chr19	0.012563	0.237895	0.214114	1.34492	1.37555	0.123612
ENSG00000032742	708.033	-0.461586	0.421293	-1.09564	0.273237	0.761733	IFT88	chr13	2.24844	4.87881	3.10382	2.57943	2.88721	1.13597
ENSG00000033011	105.363	-0.0357675	0.783045	-0.0456774	0.963567	0.995836	ALG1	chr16	0.375662	0.492718	0.885247	0.565263	0.418168	1.24736
ENSG00000033030	1153.25	-0.0990158	0.396761	-0.249561	0.802927	0.972204	ZCCHC8	chr12	2.65256	7.83283	3.3691	6.69083	2.73648	2.46571
ENSG00000033050	2307.28	-0.496781	0.538798	-0.922017	0.35652	0.824573	ABCF2	chr7	29.8249	9.61105	5.88094	9.09778	10.7787	10.4053
ENSG00000033100	69.327	-0.25478	0.960769	-0.265184	0.790868	0.970721	CHPF2	chr7	0.722691	0.454669	0.298943	0.166718	0.60439	0.828015
ENSG00000033122	921.243	-0.783424	0.39785	-1.96914	0.0489368	0.401552	LRRC7	chr1	1.12907	2.0448	1.34317	0.797288	0.903813	1.19827
ENSG00000033170	425.99	-1.38021	0.447937	-3.08126	0.00206125	0.0900641	FUT8	chr14	0.677167	0.189611	0.579582	0.035946	0.04246	0.041518
ENSG00000033178	5449.62	-0.657147	0.267171	-2.45965	0.0139074	0.231934	UBA6	chr4	10.0672	11.1105	13.1957	8.77465	8.11888	6.39053
ENSG00000033327	909.982	0.173106	0.308567	0.561	0.574797	0.924495	GAB2	chr11	3.12965	3.28167	2.43946	2.70801	2.01008	0.815365
ENSG00000033627	592.465	0.277543	0.442795	0.626797	0.530792	0.910694	ATP6V0A1	chr17	2.2978	2.94031	1.06547	4.81587	2.0407	2.07201
ENSG00000033800	7213.69	-0.631629	0.39024	-1.61856	0.105541	0.547225	PIAS1	chr15	13.5316	15.9084	21.2551	10.9277	13.0695	5.9063
ENSG00000033867	20145.6	-0.250966	0.337506	-0.74359	0.457125	0.883646	SLC4A7	chr3	60.4136	55.2631	63.2853	45.8693	49.6367	35.4345
ENSG00000034053	109.85	0.274002	1.06839	0.256462	0.797594	0.971524	APBA2	chr15	0.069353	0.010355	0.021537	1.34601	0.038865	0.033824
ENSG00000034152	990.129	0.871355	0.493316	1.76632	0.0773421	0.485082	MAP2K3	chr17	8.31921	3.02308	4.27983	14.0514	12.4439	6.61553
ENSG00000034239	0.153734	-0.840481	4.08047	-0.205976	0.836809	NA	EFCAB1	chr8	0	0	0.001515	0	0	0
ENSG00000034510	1524.63	0.903781	0.808493	1.11786	0.263627	0.756124	TMSB10	chr2	4.89094	32.3525	83.7065	33.4028	103.959	130.686
ENSG00000034533	234.617	-0.289627	0.68078	-0.425435	0.67052	0.945891	ASTE1	chr3	2.48209	1.06919	1.7887	2.57305	2.1832	0.378421
ENSG00000034677	1309.58	-0.0306553	0.331936	-0.0923531	0.926417	0.98887	RNF19A	chr8	5.62995	7.41838	6.68622	6.93116	6.6369	5.87634
ENSG00000034693	1140.27	0.0516216	0.370927	0.139169	0.889316	0.982845	PEX3	chr6	13.2074	9.04119	8.4105	13.9859	9.40847	11.9246
ENSG00000034713	20677.3	0.34669	0.32582	1.06405	0.287305	0.773251	GABARAPL2	chr16	282.111	210.583	153.464	352.568	260.342	354.754
ENSG00000034971	29.2213	-0.0770598	0.925252	-0.0832852	0.933625	0.989816	MYOC	chr1	0.114901	0.170685	0.155404	0.066759	0.093513	0.191538
ENSG00000035115	118.087	0.0517371	0.767491	0.0674107	0.946255	0.991592	SH3YL1	chr2	0.22435	1.2354	0.178579	0.242367	0.192613	0.111012
ENSG00000035141	576.149	0.771175	0.364951	2.11309	0.034593	0.350793	FAM136A	chr2	4.2681	4.43356	3.51254	7.14368	7.59585	8.57751
ENSG00000035403	1582.26	-1.03291	0.330159	-3.12852	0.00175688	0.0820428	VCL	chr10	5.54263	7.30051	1.12601	1.07281	0.786663	0.867791
ENSG00000035499	3261.95	-0.199458	0.439484	-0.453845	0.64994	0.941819	DEPDC1B	chr5	27.6048	9.28848	26.8409	13.7815	16.142	20.2387
ENSG00000035664	19.4899	-6.72431	2.24151	-2.99991	0.00270064	0.106978	DAPK2	chr15	0.564348	0.004108	0.006227	0.00298	0	0
ENSG00000035681	53.5333	6.18352	1.59796	3.86964	0.000108996	0.015244	NSMAF	chr8	0	0.002423	0.010501	0.038312	0.00861	0.71988
ENSG00000035687	283.314	0.329817	0.677279	0.486974	0.626277	0.937305	ADSS	chr1	0.706728	3.1713	2.88542	1.14932	3.31881	4.66016
ENSG00000035720	0	NA	NA	NA	NA	NA	STAP1	chr4	0	0	0	0	0	0
ENSG00000035862	1248.17	0.519026	0.474234	1.09445	0.273757	0.761837	TIMP2	chr17	1.52565	3.98017	7.55923	4.17718	7.14286	8.68158
ENSG00000035928	9478.59	-0.662505	0.271029	-2.4444	0.0145092	0.235759	RFC1	chr4	18.4085	58.2993	47.3786	14.0808	15.1682	25.2813
ENSG00000036054	6836.48	-0.560378	0.384074	-1.45904	0.144555	0.614851	TBC1D23	chr3	27.6763	29.2632	33.1031	12.9359	14.6447	9.96603
ENSG00000036257	366.607	0.154717	0.521012	0.296956	0.7665	0.963717	CUL3	chr2	2.27401	1.55573	2.37966	3.82161	0.637848	2.75552
ENSG00000036448	91.4401	0.014135	1.04757	0.0134932	0.989234	0.998843	MYOM2	chr8	0.206662	0.194776	2.77768	0.351966	0.127924	0.208591
ENSG00000036473	0	NA	NA	NA	NA	NA	OTC	chrX	0	0	0	0	0	0
ENSG00000036530	124.63	1.10257	0.937226	1.17642	0.239429	0.736178	CYP46A1	chr14	0.035153	0.059005	0.20033	0.032259	0.297592	0.338032
ENSG00000036549	760.058	-0.695435	0.471544	-1.4748	0.140265	0.606309	ZZZ3	chr1	0.990262	4.58445	1.18836	1.40363	0.80983	0.476621
ENSG00000036565	0	NA	NA	NA	NA	NA	SLC18A1	chr8	0	0	0	0	0	0
ENSG00000036672	7004.77	-0.392681	0.403222	-0.973859	0.330127	0.805152	USP2	chr11	33.5523	23.6044	44.3129	40.3818	40.6834	19.7476
ENSG00000036828	22.5063	2.86776	2.61201	1.09791	NA	NA	CASR	chr3	0	0.024785	0.000426	0.003084	0.146555	0.012279
ENSG00000037042	14833.2	-0.250498	0.316376	-0.791774	0.428492	0.869271	TUBG2	chr17	179.586	104.527	130.911	106.416	149.104	115.369
ENSG00000037241	5074.97	0.0138558	0.343857	0.0402952	0.967858	0.996639	RPL26L1	chr5	107.93	108.621	135.576	65.336	128.097	122.446
ENSG00000037280	0	NA	NA	NA	NA	NA	FLT4	chr5	0	0	0	0	0	0
ENSG00000037474	5160.79	-0.0696416	0.52875	-0.13171	0.895214	0.983334	NSUN2	chr5	46.2322	10.0267	29.9174	43.0396	36.1641	22.2855
ENSG00000037637	327.157	0.720451	0.449669	1.60218	0.109116	0.551988	FBXO42	chr1	0.404	0.503891	0.645495	1.36702	0.822069	0.712706
ENSG00000037749	250.061	-1.72267	0.682267	-2.52492	0.0115726	0.212545	MFAP3	chr5	1.6871	4.74111	3.31768	2.39048	0.292093	0.20245
ENSG00000037757	5.01055	4.85574	3.26331	1.48798	0.136756	NA	MRI1	chr19	0.024666	0.036557	0.019725	0.011778	0.714425	0.202071
ENSG00000037897	35.8401	0.732009	1.52217	0.4809	0.630588	0.937305	METTL1	chr12	0.016344	0.064225	0.752958	0.671158	0.185299	0.4077
ENSG00000037965	0.321129	1.90997	4.04415	0.47228	0.636727	NA	HOXC8	chr12	0	0	0	0.005533	0	0
ENSG00000038002	193.763	-1.48068	0.561986	-2.63473	0.00842052	0.183431	AGA	chr4	1.67487	2.90193	3.52279	1.11884	0.474684	1.62492
ENSG00000038210	670.52	-0.347798	0.423946	-0.820383	0.411998	0.860414	PI4K2B	chr4	4.47715	4.84537	6.46996	4.05183	5.62996	4.04225
ENSG00000038219	6738.97	-0.18793	0.447862	-0.419616	0.674766	0.945891	BOD1L1	chr4	5.45405	17.0397	15.9238	8.44084	12.4039	11.7339
ENSG00000038274	15195.5	-0.0400955	0.379561	-0.105637	0.915871	0.987912	MAT2B	chr5	111.475	29.9874	51.2314	37.3135	18.7434	27.3522
ENSG00000038295	524.016	-0.515187	0.443608	-1.16135	0.245498	0.740848	TLL1	chr4	0.242758	0.188491	0.210922	0.20962	0.099524	0.195774
ENSG00000038358	362.858	-0.674215	0.809795	-0.832575	0.405085	0.855513	EDC4	chr16	6.06844	3.06644	3.40565	3.04905	4.60768	5.91562
ENSG00000038382	3155.41	0.111682	0.312197	0.357728	0.720547	0.954187	TRIO	chr5	2.2433	4.1975	4.81281	4.00225	3.31286	4.2325
ENSG00000038427	2087.07	2.14897	0.74004	2.90385	0.00368605	0.122899	VCAN	chr5	0.153046	2.43173	2.54903	3.7563	5.73834	13.1334
ENSG00000038532	523.177	0.21837	0.544857	0.400785	0.688579	0.948523	CLEC16A	chr16	0.471981	0.25524	0.116377	0.448853	0.436813	0.836591
ENSG00000038945	181.232	-0.646686	0.651335	-0.992863	0.320777	0.798844	MSR1	chr8	0.651492	2.03024	0.589006	0.643192	0.652501	0.713882
ENSG00000039068	2284.39	0.276265	0.280839	0.983714	0.325256	0.802375	CDH1	chr16	7.92741	1.1481	7.57693	1.4889	1.85913	1.03348
ENSG00000039123	406.661	0.564998	0.538169	1.04985	0.293785	0.775818	SKIV2L2	chr5	0.769206	1.83304	0.604211	1.68607	2.05177	1.56255
ENSG00000039139	589.768	-1.14442	0.564643	-2.02681	0.0426819	0.378433	DNAH5	chr5	1.4357	0.781771	0.819931	0.623703	0.717833	0.183117
ENSG00000039319	1273.91	-1.0704	0.457679	-2.33875	0.0193484	0.267684	ZFYVE16	chr5	1.16073	2.53095	1.56525	1.25066	0.809016	0.627074
ENSG00000039523	14.901	1.2989	2.18204	0.595266	0.551666	0.916699	RIPOR1	chr16	0	0.028804	0.013408	0.089094	0.054538	0.024988
ENSG00000039537	0.837329	2.02682	3.97241	0.510224	0.609895	NA	C6	chr5	0	0	0.001143	0	0.001862	0
ENSG00000039560	7670.24	-0.280799	0.346641	-0.810059	0.417907	0.862975	RAI14	chr5	32.4406	17.1377	24.7296	29.3724	28.7545	16.345
ENSG00000039600	5178.35	-0.308219	0.280736	-1.0979	0.27225	0.761648	SOX30	chr5	33.8159	27.7104	31.604	30.0757	29.1372	24.0586
ENSG00000039650	28.7035	4.53542	1.38627	3.27166	0.00106917	0.0619111	PNKP	chr19	0	0.000633	0.113248	0.332256	0.488996	0.15977
ENSG00000039987	0.80721	-3.08587	3.95965	-0.77933	0.435785	NA	BEST2	chr19	0.032325	0	0	0	0	0
ENSG00000040199	49.5934	-0.723427	1.28802	-0.56166	0.574348	0.924341	PHLPP2	chr16	0.002722	0.065446	0.16563	0.09692	0.055697	0.027144
ENSG00000040275	18170.2	-0.88537	0.337473	-2.62353	0.00870241	0.18651	SPDL1	chr5	100.006	204.21	101.481	77.0765	86.8234	93.1452
ENSG00000040341	3389.55	-0.79717	0.312083	-2.55435	0.0106386	0.204599	STAU2	chr8	16.2298	16.4427	17.5156	9.24207	4.50757	9.03852
ENSG00000040487	154.271	-0.0718693	0.890952	-0.0806657	0.935708	0.990047	PQLC2	chr1	1.78612	0.74199	0.232349	1.76266	0.935824	0.2883
ENSG00000040531	293.296	-0.545058	0.600082	-0.908307	0.363716	0.829633	CTNS	chr17	3.62767	1.23171	2.12024	2.61594	2.38797	1.11378
ENSG00000040608	201.197	0.27357	0.565114	0.484098	0.628316	0.937305	RTN4R	chr22	2.21117	0.30619	0.663381	1.8591	0.841978	2.47396
ENSG00000040633	123.502	2.03757	0.749909	2.71708	0.006586	0.163868	PHF23	chr17	0.406068	0.380095	0.432899	0.887132	2.35956	1.25184
ENSG00000040731	3.94612	-5.3989	3.91748	-1.37815	0.168156	NA	CDH10	chr5	0.042448	0.093518	0	0	0	0
ENSG00000040933	946.057	0.0386433	0.536072	0.0720861	0.942533	0.990797	INPP4A	chr2	0.647299	1.34298	1.77088	0.709823	2.00393	1.59189
ENSG00000041353	838.521	-0.573171	0.53491	-1.07153	0.283932	0.770402	RAB27B	chr18	0.872127	0.368001	0.671219	0.696113	0.287753	0.173034
ENSG00000041357	2891.98	-0.300758	0.320113	-0.939536	0.347456	0.817265	PSMA4	chr15	8.26384	13.7118	13.4045	29.3799	11.9199	37.9085
ENSG00000041515	788.061	0.394197	0.455392	0.865622	0.386698	0.843646	MYO16	chr13	0.270599	0.234256	0.410167	0.511994	0.884776	0.188772
ENSG00000041802	384.992	0.448682	0.49024	0.91523	0.360071	0.827125	LSG1	chr3	2.03493	1.84274	1.19302	3.83838	1.40478	1.96077
ENSG00000041880	0.324633	0.1213	4.08047	0.0297269	0.976285	NA	PARP3	chr3	0	0	0.011602	0	0.014925	0
ENSG00000041982	155.183	4.73874	1.29579	3.65703	0.000255157	0.0263838	TNC	chr9	0.054362	0.004477	0	0.20182	1.10282	0.18088
ENSG00000041988	12.5826	1.62675	2.72431	0.597124	0.550424	0.916268	THAP3	chr1	0.483433	0.722698	0.618056	0.797902	0.716087	0.273003
ENSG00000042062	4024.35	0.218827	0.410579	0.532972	0.594053	0.929635	RIPOR3	chr20	13.8549	6.31492	14.1505	12.4492	17.338	15.3469
ENSG00000042088	39224	-0.522076	0.337886	-1.54512	0.122317	0.57866	TDP1	chr14	175.84	97.5	110.454	179.39	115.535	109.837
ENSG00000042286	17.4469	1.01657	1.8989	0.535343	0.592412	0.92905	AIFM2	chr10	0.132587	0	0.006571	0.147718	0.076791	0.058206
ENSG00000042304	22.5073	-1.95156	2.45638	-0.794483	0.426914	0.868223	C2orf83	chr2	0	0.071521	0.26732	0	0	0.094819
ENSG00000042317	1079.82	-0.487234	0.303963	-1.60294	0.108948	0.551983	SPATA7	chr14	8.20249	10.906	7.75806	6.72858	1.2077	5.13376
ENSG00000042429	31.0505	0.461615	1.7571	0.262714	0.792771	0.971524	MED17	chr11	0.919559	1.83522	0.926731	2.78296	0.676796	0.221643
ENSG00000042445	156.141	0.0613241	1.18469	0.0517637	0.958717	0.995169	RETSAT	chr2	1.75474	0.159716	0.392375	0.499334	2.06063	0.041749
ENSG00000042493	28.5721	-0.302769	1.37869	-0.219605	0.826178	0.974523	CAPG	chr2	0.092829	0.12154	0.290045	0.291093	0.006512	0.139218
ENSG00000042753	1044.44	1.42919	0.418616	3.41409	0.00063995	0.0442648	AP2S1	chr19	9.09411	11.4399	14.7656	63.4184	26.2003	33.2734
ENSG00000042781	605.56	-0.873234	0.418297	-2.08759	0.0368345	0.359187	USH2A	chr1	0.902576	1.48571	0.542232	0.549154	3.06299	2.34458
ENSG00000042813	19.8649	-1.50422	1.75654	-0.856358	0.3918	0.846843	ZPBP	chr7	0.006189	0.001017	0.025967	0.005087	0.049359	0.044793
ENSG00000042832	4.86236	-1.03585	2.92932	-0.353613	0.723629	NA	TG	chr8	0.003833	0	0.05941	0	0.002613	0.008294
ENSG00000042980	41.6298	-0.635707	1.32046	-0.481429	0.630212	0.937305	ADAM28	chr8	0.013397	0.005116	0.443896	0.016637	0.08154	0.049113
ENSG00000043039	908.101	0.695086	0.447705	1.55255	0.12053	0.575497	BARX2	chr11	3.69728	4.58655	2.16789	7.54522	3.82915	7.32592
ENSG00000043093	424.997	-0.138971	0.537818	-0.258398	0.7961	0.971524	DCUN1D1	chr3	0.467467	2.98914	0.464404	0.974692	0.346193	1.20028
ENSG00000043143	1.2882	0.128239	3.86475	0.0331818	0.97353	NA	JADE2	chr5	0	0	0.004935	0.000766	0.006511	0
ENSG00000043355	238.014	-3.48289	0.852794	-4.0841	4.42e-05	0.00927129	ZIC2	chr13	1.72838	0.445187	4.40396	0.430413	0.142981	0.117505
ENSG00000043462	32.9893	0.343601	1.20091	0.286117	0.774788	0.967068	LCP2	chr5	0.058229	0.149349	0.030506	0.345334	0.043781	0.020226
ENSG00000043514	5160.35	-0.140753	0.31327	-0.449304	0.653213	0.943247	TRIT1	chr1	44.4239	45.6465	32.8266	41.8068	45.8874	45.8298
ENSG00000043591	0.398493	-2.11277	4.00971	-0.526913	0.598254	NA	ADRB1	chr10	0	0.019667	0.01123	0	0	0
ENSG00000044012	0	NA	NA	NA	NA	NA	GUCA2B	chr1	0	0	0	0	0	0
ENSG00000044090	26.1483	3.81575	1.4243	2.67903	0.0073836	0.172865	CUL7	chr6	0	0.029378	0.013385	0.219686	0.063546	0.530897
ENSG00000044115	25871	-0.297347	0.347598	-0.855432	0.392312	0.84696	CTNNA1	chr5	166.266	103.094	90.0167	123.339	12.9682	73.1199
ENSG00000044446	298.932	-0.110965	0.551991	-0.201028	0.840677	0.976715	PHKA2	chrX	1.14521	1.22678	1.01425	1.22661	2.83058	1.51924
ENSG00000044459	971.972	-0.743268	0.479342	-1.5506	0.120997	0.575667	CNTLN	chr9	1.36267	1.47808	3.71072	1.06013	1.97555	2.32438
ENSG00000044524	0.153734	-0.840481	4.08047	-0.205976	0.836809	NA	EPHA3	chr3	0	0	0.003626	0	0	0
ENSG00000044574	2021.97	0.336195	0.553023	0.607923	0.543238	0.913671	HSPA5	chr9	6.29196	15.2472	3.92532	18.248	7.14652	10.8162
ENSG00000046604	133.028	-0.332961	0.697174	-0.477587	0.632944	0.937305	DSG2	chr18	1.27866	0.464233	1.4144	0.524134	0.470082	0.810484
ENSG00000046647	75.1864	-1.27849	0.981684	-1.30234	0.192799	0.687137	GEMIN8	chrX	0.179277	0.07069	0.487462	0.157095	0.025289	0.117283
ENSG00000046651	79254.6	-0.444556	0.334771	-1.32794	0.184198	0.679445	OFD1	chrX	475.592	417.105	436.243	242.228	283.255	352.028
ENSG00000046653	5945.08	-0.962766	0.308094	-3.12491	0.00177862	0.0823793	GPM6B	chrX	48.0348	43.4758	71.3727	32.8329	28.5845	37.1527
ENSG00000046774	9.93081	0.182738	1.75142	0.104337	0.916902	0.987912	MAGEC2	chrX	0.009969	0.025881	0.085598	0.01554	0.036337	0.021497
ENSG00000046889	32.5697	-0.550044	2.00475	-0.27437	0.7838	0.969209	PREX2	chr8	0.068876	0	0.125141	0.030758	0	0.093471
ENSG00000047056	681.576	0.428378	0.394713	1.08529	0.277792	0.766383	WDR37	chr10	0.616123	0.63775	0.441523	0.734227	0.589294	0.68685
ENSG00000047188	731.37	0.466731	0.482761	0.966795	0.333646	0.807199	YTHDC2	chr5	0.805923	1.39047	0.825931	2.05884	0.804024	1.69458
ENSG00000047230	34.8302	0.830638	1.96016	0.42376	0.671741	0.945891	CTPS2	chrX	0.191084	0	0.153549	0.36576	0.161628	0
ENSG00000047249	1544.16	0.291017	0.376582	0.772784	0.43965	0.874905	ATP6V1H	chr8	13.1831	9.15377	13.6262	22.5195	5.78372	17.5816
ENSG00000047315	1281.33	0.575863	0.474162	1.21449	0.224562	0.723286	POLR2B	chr4	2.95182	4.69346	4.04964	8.95391	3.14816	5.66551
ENSG00000047346	17678.8	-1.50646	0.43355	-3.4747	0.000511428	0.038056	FAM214A	chr15	37.1603	43.0981	68.4022	17.0448	8.75087	11.1839
ENSG00000047365	4252.29	-0.946951	0.32425	-2.92043	0.00349548	0.121799	ARAP2	chr4	5.56904	6.61746	3.81176	3.33058	3.32688	3.3856
ENSG00000047410	14897.2	-0.506155	0.286471	-1.76686	0.0772511	0.485073	TPR	chr1	47.0183	56.072	34.4256	25.933	27.5207	33.7231
ENSG00000047457	3.92516	1.40132	3.78241	0.370485	0.711021	NA	CP	chr3	0.007401	0.008725	0.024627	0.004982	0.046616	0.010891
ENSG00000047578	217.193	-0.212022	0.456674	-0.464274	0.642451	0.940195	KIAA0556	chr16	0.373428	1.33658	0.534804	0.686711	0.669158	0.842541
ENSG00000047579	570.509	-0.127797	0.337953	-0.37815	0.705319	0.953011	DTNBP1	chr6	5.71249	3.23183	3.86551	3.43498	4.142	3.50819
ENSG00000047597	16.5851	-7.46748	2.69251	-2.77343	0.00554693	0.151249	XK	chrX	0.156342	0	0.195654	0	0	0
ENSG00000047617	1.10142	-3.5698	3.94468	-0.904968	0.365482	NA	ANO2	chr12	0.002796	0.015136	0.001239	0	0	0.00225
ENSG00000047621	765.774	-0.676639	0.375471	-1.80211	0.0715287	0.472624	C12orf4	chr12	3.44058	5.22431	3.64644	2.59014	4.32789	4.33569
ENSG00000047634	23511.2	-0.559903	0.309074	-1.81155	0.070056	0.468727	SCML1	chrX	108.94	127.858	169.82	87.9978	116.472	151.86
ENSG00000047644	6781.05	0.683884	0.581479	1.17611	0.23955	0.736185	WWC3	chrX	21.6803	6.90752	11.1809	44.3154	11.4153	18.7978
ENSG00000047648	213.603	0.344648	0.822437	0.419056	0.675175	0.945891	ARHGAP6	chrX	0.093759	0.129331	0.743339	0.136579	0.025749	0.349429
ENSG00000047662	5493.72	0.948693	0.554569	1.71069	0.0871393	0.508006	FAM184B	chr4	9.70912	20.7212	9.17909	32.5397	11.2905	46.5582
ENSG00000047849	8839.13	-0.335804	0.389982	-0.861075	0.389197	0.845815	MAP4	chr3	40.0323	15.3498	10.7712	10.7996	12.0898	10.4751
ENSG00000047932	5089.11	-0.181091	0.457973	-0.395419	0.692534	0.94969	GOPC	chr6	13.0737	18.3983	34.2268	17.034	31.1169	17.5178
ENSG00000047936	2918.06	-0.869302	0.373753	-2.32587	0.0200255	0.271759	ROS1	chr6	10.4407	5.70821	7.12676	5.57048	4.96679	3.25008
ENSG00000048028	92.1551	0.437579	0.777141	0.563063	0.573392	0.923625	USP28	chr11	0.058726	0.298767	0.13397	0.491844	0.17108	0.89322
ENSG00000048052	10009.4	-0.0948399	0.417661	-0.227074	0.820366	0.973714	HDAC9	chr7	2.28194	3.3559	9.0921	1.06397	5.29283	1.39019
ENSG00000048140	22.0423	-3.23495	1.56345	-2.06912	0.0385353	0.366941	TSPAN17	chr5	0.098463	0.273901	0.070174	0.047306	0.016787	0
ENSG00000048162	150.894	0.969218	0.504571	1.92087	0.0547476	0.42218	NOP16	chr5	0.998243	0.769778	1.81062	1.21616	1.67851	3.09288
ENSG00000048342	11.2201	-1.01306	2.53482	-0.399658	0.689408	0.948763	CC2D2A	chr4	0	0.002717	0.107504	0.003928	0.029721	0
ENSG00000048392	5689.55	-0.242997	0.318168	-0.763737	0.445024	0.878899	RRM2B	chr8	20.2198	17.2142	26.1669	23.3649	52.209	15.0806
ENSG00000048405	650.508	0.485679	0.388229	1.25101	0.21093	0.70653	ZNF800	chr7	3.25493	6.00459	3.72917	4.58448	5.47518	4.19014
ENSG00000048462	0	NA	NA	NA	NA	NA	TNFRSF17	chr16	0	0	0	0	0	0
ENSG00000048471	668.226	0.123709	0.435013	0.284379	0.77612	0.967459	SNX29	chr16	1.77205	1.29912	1.12813	3.13493	1.10668	1.9065
ENSG00000048540	995.498	-0.528387	0.385401	-1.37101	0.170373	0.65627	LMO3	chr12	2.22239	4.21385	6.03957	3.13167	1.69345	3.0106
ENSG00000048544	1114.07	0.255087	0.407192	0.626453	0.531018	0.910699	MRPS10	chr6	11.9702	8.80064	5.95492	11.4388	10.0119	14.4055
ENSG00000048545	15.0136	7.44628	2.76118	2.69678	0.00700142	0.167908	GUCA1A	chr6	0	0	0	0.159719	0.653788	0
ENSG00000048649	1615.29	0.102065	0.404633	0.25224	0.800856	0.972085	RSF1	chr11	2.14067	8.04253	2.99847	4.525	2.90135	3.07809
ENSG00000048707	2835.24	-0.260059	0.298925	-0.86998	0.384311	0.841729	VPS13D	chr1	0.92959	0.948578	1.32104	0.862218	1.11807	0.860268
ENSG00000048740	13649.3	0.182169	0.297983	0.611343	0.540973	0.913251	CELF2	chr10	11.7104	10.7502	6.25319	13.4398	4.7369	11.4912
ENSG00000048828	782.992	0.450412	0.483072	0.932392	0.351134	0.820463	FAM120A	chr9	1.09651	1.69807	3.81031	1.93803	4.091	2.67682
ENSG00000048991	1521.58	-0.0938298	0.360683	-0.260144	0.794752	0.971524	R3HDM1	chr2	4.62925	6.87408	2.46854	4.74235	2.57582	3.65236
ENSG00000049089	13.1713	-2.10373	2.84977	-0.73821	NA	NA	COL9A2	chr1	0	0.263545	0.007034	0	0	0.067158
ENSG00000049130	12.7501	-0.644982	2.84923	-0.226371	0.820913	0.973714	KITLG	chr12	0	0.143968	0.005615	0.108187	0	0
ENSG00000049167	27.7894	-1.10922	1.3603	-0.815428	0.414827	0.861879	ERCC8	chr5	0.134485	0.502558	0.183357	0.091213	0.033018	0.171101
ENSG00000049192	3.70683	4.40645	3.64355	1.20938	0.226515	NA	ADAMTS6	chr5	0	0	0.002215	0.064254	0.004228	0
ENSG00000049239	350.789	0.1225	0.559745	0.21885	0.826767	0.974806	H6PD	chr1	0.223327	0.418179	0.680088	0.408832	0.808924	0.38045
ENSG00000049245	10650.7	-0.371878	0.357756	-1.03948	0.298583	0.779885	VAMP3	chr1	126.157	87.7541	79.8677	101.559	101.427	60.8655
ENSG00000049246	2164.83	-0.11658	0.353308	-0.329967	0.741425	0.958704	PER3	chr1	10.0988	13.499	20.2624	16.095	6.32825	19.3109
ENSG00000049247	1.92678	4.48621	3.93014	1.14149	0.253667	NA	UTS2	chr1	2.38426	1.27756	1.72436	2.89917	1.76559	2.71913
ENSG00000049249	5.14255	2.94452	3.31627	0.887903	0.374593	NA	TNFRSF9	chr1	0.001146	0	0	0.028432	0.001509	0
ENSG00000049283	0.557339	-2.55209	3.98303	-0.640742	0.521691	NA	EPN3	chr17	0.021412	0	0.011206	0	0	0
ENSG00000049323	1382.13	0.574558	0.354043	1.62285	0.104622	0.545733	LTBP1	chr2	1.45391	2.43561	3.2824	3.67849	4.03759	4.03811
ENSG00000049449	287.881	1.97393	0.805487	2.4506	0.0142618	0.234911	RCN1	chr11	0.315033	2.67845	0.930759	8.75197	2.03751	5.81512
ENSG00000049540	4.14124	-0.775473	3.65141	-0.212376	0.831813	NA	ELN	chr7	0	0	0.006098	0.005893	0.006727	0
ENSG00000049541	254.341	0.553206	0.617372	0.896066	0.370217	0.834179	RFC2	chr7	3.60937	1.66449	0.705288	3.98028	3.28198	3.32392
ENSG00000049618	800.748	-0.720466	0.368369	-1.95583	0.0504853	0.406461	ARID1B	chr6	0.58414	5.21753	3.4769	0.491468	1.35173	1.43418
ENSG00000049656	6576.43	0.688879	0.487225	1.41388	0.157397	0.636742	CLPTM1L	chr5	5.75589	7.25644	67.0809	8.43578	22.9897	18.3782
ENSG00000049759	1461.68	-0.165463	0.404492	-0.409065	0.682492	0.947457	NEDD4L	chr18	1.01786	1.11143	3.09956	0.959067	3.10206	2.15287
ENSG00000049768	2.01555	1.08369	3.82707	0.283163	0.777052	NA	FOXP3	chrX	0.010567	0.006585	0	0	0.021668	0
ENSG00000049769	92.5446	1.16851	0.857631	1.36248	0.173046	0.661226	PPP1R3F	chrX	0.08209	0.397775	0.434501	0.34023	1.14314	0.462225
ENSG00000049860	8425.62	-0.0879407	0.331023	-0.265664	0.790498	0.970689	HEXB	chr5	85.5479	79.6799	62.3515	75.4033	98.0039	14.608
ENSG00000049883	19.8235	0.0265388	1.99815	0.0132816	0.989403	0.998843	PTCD2	chr5	0.016558	0.002173	0.07602	0.092596	0.00677	0
ENSG00000050030	0.170899	1.08307	4.08047	0.265428	0.79068	NA	NEXMIF	chrX	0	0	0	0	0.003717	0
ENSG00000050130	35.0992	1.30396	1.18985	1.0959	0.273121	0.761733	JKAMP	chr14	0.007503	0.12982	0.255784	0.22795	0.299121	0.236746
ENSG00000050165	46.5614	-0.239886	3.72894	-0.0643308	0.948707	0.991878	DKK3	chr11	0	0	0.176593	0.386663	0	0.018825
ENSG00000050327	15.8269	0.158605	2.48711	0.0637707	0.949153	0.991878	ARHGEF5	chr7	0.018383	0.007217	0.236662	0.063628	0.004296	0.246223
ENSG00000050344	839.555	-1.16091	0.927161	-1.25211	0.21053	0.706203	NFE2L3	chr7	2.63921	5.19486	9.15666	0.274116	2.64008	6.71991
ENSG00000050393	4319.22	-0.372176	0.271362	-1.37151	0.170215	0.656137	MCUR1	chr6	13.4753	16.5156	16.6563	15.5768	18.922	11.8851
ENSG00000050405	114881	-0.569966	0.344926	-1.65243	0.0984471	0.530933	LIMA1	chr12	693.684	402.052	527.709	522.152	426.562	397.684
ENSG00000050426	108.431	-0.48878	0.637054	-0.767251	0.442932	0.87766	LETMD1	chr12	0.46305	0.321576	0.969986	0.322935	0.498136	0.785292
ENSG00000050438	43.6651	-0.133849	1.17201	-0.114205	0.909076	0.98712	SLC4A8	chr12	0.23896	0.207904	0.028722	0.089819	0.020025	0.015774
ENSG00000050555	32.4439	-3.91642	1.65804	-2.36208	0.0181728	0.261581	LAMC3	chr9	0.287115	0.067917	0.004743	0.013441	0.019068	0
ENSG00000050628	0	NA	NA	NA	NA	NA	PTGER3	chr1	0	0	0.000265	0	0.000765	0
ENSG00000050730	0.324633	0.1213	4.08047	0.0297269	0.976285	NA	TNIP3	chr4	0	0	0.007789	0	0.002739	0
ENSG00000050748	461.334	0.0203236	0.535388	0.0379605	0.969719	0.996639	MAPK9	chr5	0.900813	0.8877	0.512653	0.513739	0.820504	0.323939
ENSG00000050767	208.189	0.901461	0.878704	1.0259	0.30494	0.78561	COL23A1	chr5	0.121205	0.045728	0.007828	0.159288	0.140582	0.086911
ENSG00000050820	472.147	0.625896	0.561383	1.11492	0.264885	0.756288	BCAR1	chr16	1.729	1.46711	4.43025	1.77719	6.25961	2.77698
ENSG00000051009	5991.35	1.39199	0.343231	4.05555	5e-05	0.00959592	FAM160A2	chr11	15.5262	16.9538	14.8286	54.8535	39.1717	29.0084
ENSG00000051108	1416.36	-0.142187	0.600708	-0.2367	0.81289	0.972227	HERPUD1	chr16	8.29901	5.51922	6.05385	22.0053	3.75732	2.0787
ENSG00000051128	18.7854	1.802	2.11069	0.853748	0.393245	0.847595	HOMER3	chr19	0.024837	0.146397	0.164931	0	1.50787	0.123371
ENSG00000051180	1078.09	0.0599164	0.607617	0.0986087	0.921449	0.987912	RAD51	chr15	8.36347	8.48458	6.96639	19.7309	7.07155	2.6175
ENSG00000051341	2158.99	-0.389809	0.337217	-1.15596	0.247697	0.743897	POLQ	chr3	4.25897	4.73415	5.86995	3.88094	3.41881	4.96264
ENSG00000051382	400.806	-0.502967	0.678257	-0.741559	0.458355	0.884279	PIK3CB	chr3	1.30776	1.69041	1.07896	1.27556	1.67363	0.22831
ENSG00000051523	3.37157	0.150911	3.779	0.0399341	0.968146	NA	CYBA	chr16	0	0.057415	0	0	0	0.062475
ENSG00000051596	6547.88	0.420752	0.638415	0.659057	0.509859	0.900687	THOC3	chr5	245.048	6.82204	50.8001	147.213	62.3215	183.098
ENSG00000051620	56.6351	4.25983	1.09022	3.90731	9.33e-05	0.0148152	HEBP2	chr6	0.002019	0.019473	0.016996	0.139245	0.216238	0.244179
ENSG00000051825	424.927	0.225457	0.404563	0.557284	0.577333	0.92468	MPHOSPH9	chr12	0.819927	1.04584	0.690426	1.42443	0.887216	0.644394
ENSG00000052126	3492.45	-0.392766	0.341885	-1.14882	0.250629	0.747381	PLEKHA5	chr12	4.4097	1.64997	9.46343	1.22156	0.860903	0.961362
ENSG00000052344	1.01343	-3.4412	3.94819	-0.871591	0.383432	NA	PRSS8	chr16	0	0.018579	0.033934	0	0	0
ENSG00000052723	5228.21	-0.544334	0.271859	-2.00226	0.0452564	0.389969	SIKE1	chr1	27.9289	31.2122	31.2005	19.165	23.6363	20.7944
ENSG00000052749	62.6853	0.299125	0.836927	0.357409	0.720785	0.954256	RRP12	chr10	0.047566	0.224521	0.182542	0.076782	0.121477	0.174132
ENSG00000052795	5749.35	-0.0531177	0.350129	-0.151709	0.879416	0.981183	FNIP2	chr4	2.32812	2.02013	3.66155	2.79377	3.54304	2.49313
ENSG00000052802	2127.07	0.660844	0.63015	1.04871	0.294312	0.775818	MSMO1	chr4	9.40251	18.152	8.63511	33.072	5.15451	23.6132
ENSG00000052841	2027.34	-0.436411	0.388957	-1.122	0.261861	0.754729	TTC17	chr11	5.43279	13.6199	3.82088	3.31894	3.54503	2.77357
ENSG00000052850	0.367139	-2.00851	4.01729	-0.499967	0.617098	NA	ALX4	chr11	0	0.007221	0	0	0	0
ENSG00000053108	2614.86	-0.549823	0.275543	-1.99542	0.0459974	0.391504	FSTL4	chr5	9.99467	13.7381	9.96154	8.47002	8.50113	7.50019
ENSG00000053254	1591.69	-0.308246	0.413653	-0.74518	0.456163	0.882827	FOXN3	chr14	8.44874	3.34931	3.02617	3.06358	0.106623	0.106792
ENSG00000053328	0.642259	2.90501	3.97629	0.730582	0.465034	NA	METTL24	chr6	0	0	0	0.021937	0	0
ENSG00000053371	59.049	1.19952	0.802465	1.4948	0.134967	0.599582	AKR7A2	chr1	0.596023	0.287038	0.214475	0.731592	1.49813	1.11045
ENSG00000053372	4357.36	0.589086	0.395965	1.48772	0.136824	0.601211	MRTO4	chr1	30.3011	20.8412	25.411	34.1675	29.8913	64.5127
ENSG00000053438	20.1103	0.979718	2.56365	0.382158	0.702344	0.952165	NNAT	chr20	0	0	0.615388	0.25446	1.07885	0
ENSG00000053501	105.853	-0.389746	0.732427	-0.53213	0.594636	0.929719	USE1	chr19	0.437306	0.952491	2.2861	0.284137	0.748803	1.08289
ENSG00000053524	335.522	0.16229	0.63823	0.254281	0.799279	0.971691	MCF2L2	chr3	1.90618	0.210026	0.292078	0.42751	0.504436	0.509873
ENSG00000053702	2.23419	-4.58298	3.92561	-1.16746	0.243026	NA	NRIP2	chr12	0	0.000801	0.010823	0	0	0
ENSG00000053747	12.9174	1.23774	2.90087	0.42668	0.669612	0.945891	LAMA3	chr18	0	0	0.14962	0	0.002597	0.065347
ENSG00000053770	474.167	-0.0611286	0.635505	-0.096189	0.92337	0.988406	AP5M1	chr14	2.14434	5.64314	0.804263	2.15221	1.39453	0.368248
ENSG00000053900	2280.39	-0.0749175	0.391341	-0.191438	0.848183	0.977681	ANAPC4	chr4	11.3613	4.89634	10.5796	8.70605	7.55352	4.0441
ENSG00000053918	92.6164	-1.18551	1.31316	-0.902792	0.366636	0.831603	KCNQ1	chr11	0.0635	1.03502	0.114087	0.014947	0.070104	0.005569
ENSG00000054116	580.953	0.431134	0.634979	0.678974	0.497154	0.896302	TRAPPC3	chr1	5.03806	1.03528	3.8679	15.5201	8.0261	2.76359
ENSG00000054118	5609.83	-0.192435	0.314325	-0.612217	0.540394	0.912947	THRAP3	chr1	2.88802	3.47264	12.3986	3.0594	2.40319	3.03216
ENSG00000054148	13.1615	-0.359469	1.81122	-0.198468	0.842679	0.977336	PHPT1	chr9	0.159623	0.176206	0.618444	0.287143	0	0.053102
ENSG00000054179	16.8428	0.724347	1.77348	0.408433	0.682956	0.947457	ENTPD2	chr9	0.126329	0	0.157675	0.027106	0.149069	0.30858
ENSG00000054219	1.42451	4.04604	3.93844	1.02732	0.304269	NA	LY75	chr2	0	0	0.000348	0	0	0.017445
ENSG00000054267	4373.03	-0.376139	0.349278	-1.07691	0.281522	0.769593	ARID4B	chr1	9.12885	11.5148	17.8169	7.84654	11.4884	7.79672
ENSG00000054277	2.39779	-3.62153	3.9256	-0.922541	0.356247	NA	OPN3	chr1	0.031671	0.143134	0.218503	0.294764	0.035181	0.056756
ENSG00000054282	18534.8	-0.344518	0.30747	-1.12049	0.262504	0.755278	SDCCAG8	chr1	145.925	152.424	131.414	118.366	153.094	197.114
ENSG00000054356	12.2335	3.36866	2.21921	1.51795	0.129027	0.590862	PTPRN	chr2	0	0	0.015998	0.068661	0.006843	0.100611
ENSG00000054392	2006.25	0.295714	0.278903	1.06027	0.28902	0.773919	HHAT	chr1	0.422544	0.527478	1.52535	0.581827	0.70331	0.615324
ENSG00000054523	2283.7	0.059543	0.33964	0.175312	0.860834	0.979814	KIF1B	chr1	4.28237	1.83568	3.3385	1.34733	1.74045	1.15704
ENSG00000054598	39.7059	0.722164	1.97722	0.365243	0.71493	0.953669	FOXC1	chr6	0.010911	0.345416	0.081147	0	0.011168	0.749278
ENSG00000054611	397.22	1.21585	0.513561	2.36748	0.0179095	0.260924	TBC1D22A	chr22	0.223575	0.106773	0.101834	0.294056	0.381011	0.43493
ENSG00000054654	28313.8	-0.82597	0.272442	-3.03172	0.00243162	0.1001	SYNE2	chr14	8.12577	11.2643	24.9108	6.65456	6.89299	6.05459
ENSG00000054690	79.8426	1.50466	1.04902	1.43435	0.151473	0.626414	PLEKHH1	chr14	0.020634	0.491252	0.117194	0.446689	1.02049	0.326156
ENSG00000054793	476.849	0.280173	0.555313	0.504533	0.613887	0.93368	ATP9A	chr20	0.685085	1.71342	0.459986	1.48511	1.45368	0.988021
ENSG00000054796	19.2974	-1.90291	1.95807	-0.97183	0.331135	0.805564	SPO11	chr20	0.107993	0.052444	0.576726	0.022097	0	0.141674
ENSG00000054803	1743.11	-0.632235	0.369225	-1.71233	0.0868357	0.507977	CBLN4	chr20	8.14006	14.3399	16.0455	8.10065	9.40089	10.3027
ENSG00000054938	14.0414	1.5687	2.28908	0.685299	0.493155	0.894827	CHRDL2	chr11	0	0	0.091471	0.014615	0.098016	0.181145
ENSG00000054965	331.913	0.617463	0.552661	1.11726	0.263885	0.75619	FAM168A	chr11	0.19592	0.450637	0.399835	0.453808	0.706996	0.511253
ENSG00000054967	42.3147	0.872047	1.00921	0.864091	0.387538	0.843976	RELT	chr11	0.071157	0.331312	0.063249	0.220621	0.292965	0.40193
ENSG00000054983	975.312	-0.179665	0.56943	-0.315518	0.752369	0.961258	GALC	chr14	6.84888	1.62576	6.47852	4.71699	1.9498	1.07613
ENSG00000055044	14297.4	-0.397307	0.337115	-1.17855	0.238577	0.734695	NOP58	chr2	102.419	70.3702	147.016	81.3437	95.4443	56.0281
ENSG00000055070	668.39	-0.35738	0.607253	-0.588518	0.556184	0.918998	SZRD1	chr1	7.01457	11.9	3.32411	0.816999	5.19606	6.48671
ENSG00000055118	19.5829	2.20279	1.35368	1.62727	0.103681	0.542025	KCNH2	chr7	0.043321	0.014289	0.017206	0.091255	0.023526	0.225496
ENSG00000055130	17485.5	-0.581237	0.331934	-1.75106	0.0799348	0.49146	CUL1	chr7	82.5539	67.3011	56.7442	6.86569	8.76201	9.76938
ENSG00000055147	3702.46	-0.196851	0.340625	-0.577909	0.563326	0.920607	FAM114A2	chr5	21.2217	12.9279	16.3199	10.0313	12.3192	7.38331
ENSG00000055163	415.214	-0.0549581	0.559191	-0.0982816	0.921709	0.987912	CYFIP2	chr5	0.58001	0.331309	0.431114	0.505856	0.271167	0.528331
ENSG00000055208	3449.52	0.120057	0.445686	0.269377	0.78764	0.969786	TAB2	chr6	8.77415	0.978205	4.68525	0.78952	1.49001	1.38814
ENSG00000055211	862.029	-0.455129	0.315378	-1.44312	0.148985	0.621709	GINM1	chr6	13.6697	15.4382	15.8876	14.856	11.9675	10.3639
ENSG00000055332	5273.02	-0.134603	0.295496	-0.455516	0.648738	0.941666	EIF2AK2	chr2	9.7772	11.6282	9.27302	26.4291	10.712	7.59156
ENSG00000055483	2618.59	0.812034	0.285296	2.84628	0.00442326	0.136343	USP36	chr17	2.9894	3.38256	5.99569	8.50645	8.92531	6.39893
ENSG00000055609	52835.4	-0.319609	0.253547	-1.26055	0.207471	0.703923	KMT2C	chr7	50.7302	56.3698	56.7144	48.1067	56.4984	44.2299
ENSG00000055732	0	NA	NA	NA	NA	NA	MCOLN3	chr1	0	0	0	0	0	0
ENSG00000055813	0	NA	NA	NA	NA	NA	CCDC85A	chr2	0.172018	0.062565	0.369212	0.413062	0.428036	0.042851
ENSG00000055917	1353.36	0.115522	0.446109	0.258954	0.795671	0.971524	PUM2	chr2	0.757596	0.798878	3.77929	0.68619	1.7664	1.17048
ENSG00000055950	1568.64	-0.0258269	0.486141	-0.0531264	0.957631	0.994622	MRPL43	chr10	13.5911	20.2315	24.7219	25.9161	18.1675	37.9432
ENSG00000055955	0.244759	-1.49233	4.0557	-0.367959	0.712904	NA	ITIH4	chr3	0	0.019142	0	0	0	0
ENSG00000055957	0	NA	NA	NA	NA	NA	ITIH1	chr3	0	0	0	0	0	0
ENSG00000056050	18131.9	0.177297	0.391404	0.452977	0.650565	0.942069	HPF1	chr4	206.335	168.061	298.484	236.193	452.388	250.454
ENSG00000056097	10422.7	-0.647078	0.347324	-1.86304	0.0624568	0.446994	ZFR	chr5	34.2078	39.8685	35.1449	31.0015	21.305	21.4299
ENSG00000056277	17005.5	-0.466388	0.317211	-1.47028	0.141487	0.608435	ZNF280C	chrX	73.9304	79.2906	80.5168	46.0006	79.3937	66.4311
ENSG00000056291	79.7413	1.80434	1.25398	1.43889	0.150181	0.624408	NPFFR2	chr4	0.000465	0.085228	0.007401	0.135298	0.020084	0.00416
ENSG00000056487	255.868	0.467364	0.526918	0.886977	0.375092	0.836414	PHF21B	chr22	0.06012	0.048263	0.030217	0.098781	0.047718	0.038037
ENSG00000056558	69.0123	0.825577	0.85807	0.962133	0.335983	0.809164	TRAF1	chr9	0.217433	0.052059	0.140096	0.422928	0.298788	0.127492
ENSG00000056586	342.938	0.452585	0.48872	0.926062	0.354414	0.822793	RC3H2	chr9	0.549319	0.681934	0.524628	0.586625	1.00026	0.428858
ENSG00000056736	130.718	0.0388817	1.55974	0.0249284	NA	NA	IL17RB	chr3	0.070033	3.38302	0	0.831244	0.604819	2.11752
ENSG00000056972	6541.2	-0.493133	0.359062	-1.37339	0.16963	0.654668	TRAF3IP2	chr6	28.4998	20.7443	32.4809	22.2804	15.0221	23.3881
ENSG00000056998	14.8273	-7.30481	2.8034	-2.6057	0.00916864	0.190622	GYG2	chrX	0.282933	0	0.078498	0	0	0
ENSG00000057019	909.862	0.513168	0.783695	0.654805	0.512593	0.901449	DCBLD2	chr3	0.13095	2.29572	1.28167	3.44576	1.01987	1.79728
ENSG00000057149	0	NA	NA	NA	NA	NA	SERPINB3	chr18	0	0	0	0	0	0
ENSG00000057252	4648.31	-0.367576	0.628775	-0.584591	0.558823	0.919068	SOAT1	chr1	18.7327	6.58793	5.17343	17.8929	2.21362	9.00775
ENSG00000057294	1388.24	-1.05041	0.387751	-2.70897	0.00674925	0.165212	PKP2	chr12	6.14364	10.2782	7.66719	3.3483	2.75035	1.97588
ENSG00000057468	0	NA	NA	NA	NA	NA	MSH4	chr1	0	0	0	0	0	0
ENSG00000057593	0	NA	NA	NA	NA	NA	F7	chr13	0	0	0	0	0	0
ENSG00000057608	19565.1	0.282902	0.344219	0.821867	0.411153	0.859663	GDI2	chr10	165.252	128.02	84.7716	188.609	133.303	201.79
ENSG00000057657	10.3794	0.907488	2.89928	0.313004	0.754278	0.962043	PRDM1	chr6	0.043718	0	0.033748	0	0	0.113327
ENSG00000057663	2277.74	-0.163656	0.444985	-0.367778	0.713039	0.953669	ATG5	chr6	13.7808	11.8418	11.6269	8.41688	5.30532	7.96618
ENSG00000057704	90.5039	1.02919	1.37407	0.749012	0.45385	0.882138	TMCC3	chr12	0.011107	0.018773	0.179916	0.098734	0.018954	0.069447
ENSG00000057757	17651.8	0.389585	0.330998	1.177	0.239195	0.735602	PITHD1	chr1	163.028	222.289	138.69	200.844	281.755	291.051
ENSG00000057935	5623.28	-0.120397	0.498579	-0.241481	0.809182	0.972223	MTA3	chr2	1.22867	21.9096	7.27647	5.1351	3.21224	9.12403
ENSG00000058056	3932.39	-0.721415	0.356708	-2.02243	0.0431322	0.38073	USP13	chr3	1.70071	2.90631	2.19882	1.9564	1.17084	1.82935
ENSG00000058063	1086.77	-0.218418	0.401803	-0.543595	0.58672	0.927246	ATP11B	chr3	1.44427	1.59223	2.93192	2.44564	1.61787	1.53208
ENSG00000058085	0.341798	1.98803	4.03703	0.492449	0.622402	NA	LAMC2	chr1	0	0	0	0	0.01338	0
ENSG00000058091	47.5999	-0.196904	1.08394	-0.181655	0.855853	0.978442	CDK14	chr7	0.250304	0.173755	0.051138	0.025984	0.014481	0.103852
ENSG00000058262	1745.01	0.365495	0.347468	1.05188	0.292854	0.775264	SEC61A1	chr3	9.84084	7.69703	5.76618	12.1493	9.13728	8.89612
ENSG00000058272	13858.4	-0.743543	0.262316	-2.83453	0.00458931	0.1392	PPP1R12A	chr12	50.9101	43.5961	50.7405	59.8558	42.0674	32.3976
ENSG00000058335	663.228	-0.267453	0.448505	-0.596321	0.550961	0.916268	RASGRF1	chr15	0.352645	0.46883	0.99067	0.557461	0.224875	0.167282
ENSG00000058404	11.7657	0.0698734	2.35289	0.0296968	0.976309	0.996639	CAMK2B	chr7	0.002155	0	0.033806	0.002247	0.000326	0.036737
ENSG00000058453	1.33502	-2.68428	3.94274	-0.680818	0.495987	NA	CROCC	chr1	0	0.005609	0.006228	0	0.002361	0
ENSG00000058600	362.564	0.0741216	0.510186	0.145284	0.884487	0.982358	POLR3E	chr16	1.08229	0.768937	1.25699	0.458039	0.927256	1.12548
ENSG00000058668	5155.55	-0.0732406	0.296999	-0.246602	0.805216	0.972204	ATP2B4	chr1	21.5008	27.2643	19.1959	15.3231	25.1291	21.4933
ENSG00000058673	0.864808	-3.19907	3.95569	-0.808726	0.418673	NA	ZC3H11A	chr1	3.41976	4.46764	3.61075	3.46038	3.93575	2.74199
ENSG00000058729	7218.15	0.194115	0.365904	0.53051	0.595759	0.930084	RIOK2	chr5	18.0711	34.8912	21.8	39.0212	27.6257	28.6775
ENSG00000058799	789.577	-0.609221	0.472087	-1.29049	0.196882	0.691153	YIPF1	chr1	5.73045	14.9338	7.35927	9.45626	5.1256	4.92165
ENSG00000058804	2955.46	-0.293125	0.48524	-0.604083	0.545788	0.914183	NDC1	chr1	17.4787	12.5552	4.88828	9.80919	10.0389	12.5181
ENSG00000058866	95.7383	0.736487	0.840829	0.875906	0.381081	0.840638	DGKG	chr3	0.26479	0.168811	0.058659	0.331091	0.116425	0.172894
ENSG00000059122	240.39	0.368825	0.69973	0.527095	0.598127	0.930964	FLYWCH1	chr16	1.46185	0.290866	0.256597	0.123865	1.05028	0.243278
ENSG00000059145	22406.9	0.0710576	0.476792	0.149033	0.881528	0.981565	UNKL	chr16	177.095	68.8234	184.698	114.794	239.087	178.498
ENSG00000059377	15.4515	2.3982	2.05941	1.16451	0.244217	0.739768	TBXAS1	chr7	0	0	0.072807	0.129135	0.002822	0.009575
ENSG00000059378	12005.7	-0.134758	0.396306	-0.340036	0.733829	0.957263	PARP12	chr7	91.8135	17.9592	75.0734	31.5978	33.571	35.5361
ENSG00000059573	5080.23	-0.565181	0.558561	-1.01185	0.31161	0.791347	ALDH18A1	chr10	57.9692	13.9871	21.7996	36.6017	20.7045	14.2137
ENSG00000059588	978.487	-0.890161	0.437431	-2.03497	0.0418534	0.37569	TARBP1	chr1	1.88432	2.5614	4.62385	1.96098	2.12552	1.15548
ENSG00000059691	1665.39	-1.59064	0.353106	-4.50472	6.65e-06	0.00315605	GATB	chr4	21.7485	15.4196	23.1521	4.35755	1.58853	5.49072
ENSG00000059728	32764	-0.33647	0.298717	-1.12638	0.260003	0.753092	MXD1	chr2	108.266	84.0414	147.601	86.0705	126.778	90.1269
ENSG00000059758	1056.05	-0.838946	0.475084	-1.76589	0.0774143	0.485126	CDK17	chr12	1.78966	3.84979	5.96449	3.00854	2.1972	2.19807
ENSG00000059769	61.5729	0.88699	1.07846	0.822457	0.410817	0.859299	DNAJC25	chr9	0.082826	0.866687	0.114671	0.589808	0.77858	0.711794
ENSG00000059804	7.10093	-6.24061	2.96468	-2.10499	0.0352925	NA	SLC2A3	chr12	0.126239	0.027291	0.005516	0	0	0
ENSG00000059915	32.8682	-0.879898	1.1435	-0.769475	0.441611	0.876835	PSD	chr10	0.053283	0.039691	0.141241	0.036342	0.059402	0.093135
ENSG00000060069	579.193	0.126169	0.460203	0.274158	0.783963	0.969209	CTDP1	chr18	1.22881	0.437743	1.64714	0.961838	0.655121	0.936468
ENSG00000060138	1118.85	0.585793	0.580795	1.00861	0.313164	0.791935	YBX3	chr12	3.80131	8.28194	22.1745	5.75174	13.8891	26.7675
ENSG00000060140	311.18	-1.00099	0.7564	-1.32336	0.185716	0.680944	STYK1	chr12	4.22078	0.4932	0.202737	0.414861	0.436773	0.494623
ENSG00000060237	1295.89	-0.216052	0.378768	-0.570408	0.568401	0.922422	WNK1	chr12	2.93091	3.53002	2.04404	1.82344	5.24562	4.45362
ENSG00000060303	0.614937	-2.71855	3.97481	-0.683945	0.49401	NA	RPS17P5	chr6	0	0	0.041214	0	0	0
ENSG00000060339	8680.11	-0.592577	0.344044	-1.72239	0.0849998	0.503548	CCAR1	chr10	58.077	39.5376	26.9936	37.4998	19.7034	29.295
ENSG00000060491	55.5196	0.0117946	1.43966	0.00819263	0.993463	0.999408	OGFR	chr20	0.211642	0	0.584188	0.183518	0.335637	0.141333
ENSG00000060558	0.170899	1.08307	4.08047	0.265428	0.79068	NA	GNA15	chr19	0	0	0	0	0.01678	0
ENSG00000060566	99.8964	-1.15088	1.4159	-0.812825	0.416319	0.862842	CREB3L3	chr19	1.84569	0.753208	0.211875	1.20431	0	0.218956
ENSG00000060642	1384.05	0.19184	0.341188	0.562269	0.573933	0.923909	PIGV	chr1	5.76227	7.20058	7.04298	11.3019	5.36215	5.76535
ENSG00000060656	17.6999	-1.91006	1.81293	-1.05358	0.292077	0.775264	PTPRU	chr1	0.024334	0.123728	0.083854	0	0.003329	0.060853
ENSG00000060688	1927.22	-0.113946	0.379217	-0.300476	0.763814	0.962768	SNRNP40	chr1	20.1119	25.6632	12.0477	23.321	22.2733	17.1822
ENSG00000060709	731.839	-0.906178	0.548796	-1.65121	0.0986954	0.530933	RIMBP2	chr12	2.9064	1.51827	0.95672	1.5303	1.12687	0.59616
ENSG00000060718	24.2659	8.13925	2.69907	3.01558	NA	NA	COL11A1	chr1	0	0	0	0.370468	0.006596	0
ENSG00000060749	79.9513	1.88567	1.53871	1.22549	0.22039	0.71854	QSER1	chr11	0.007696	0.007577	0.174163	0.122271	0.019731	0.548581
ENSG00000060762	462.714	0.50204	0.510672	0.983097	0.32556	0.802375	MPC1	chr6	1.0608	1.80156	8.59843	3.19007	1.3212	3.2739
ENSG00000060971	3063.58	1.34623	0.486478	2.76729	0.00565238	0.153598	ACAA1	chr3	30.8101	15.0391	10.4434	65.1417	35.8829	60.0503
ENSG00000060982	264.494	1.5421	1.07646	1.43257	0.151982	0.627573	BCAT1	chr12	0.001412	0.920268	0.068675	0.177849	0.061744	0.290907
ENSG00000061273	38.0602	2.9235	1.69306	1.72676	0.0842109	0.501902	HDAC7	chr12	0.002557	0.03076	0.005593	0	0.267608	0.143394
ENSG00000061337	12.1805	-3.67173	2.66386	-1.37835	0.168096	0.652392	LZTS1	chr8	0.044895	0	0.184244	0	0	0.018227
ENSG00000061455	29.386	-2.86929	2.289	-1.25351	0.210019	0.705866	PRDM6	chr5	0	0.050722	0.133249	0.028271	0	0
ENSG00000061492	15.4204	-0.0355458	1.33721	-0.0265821	0.978793	0.99668	WNT8A	chr5	0.009365	0	0.025726	0	0	0
ENSG00000061656	17.4577	1.22617	2.48408	0.493613	0.621579	0.935365	SPAG4	chr20	0	0	0.257667	0.677996	0.007634	0.015732
ENSG00000061676	746.163	-0.959746	0.457547	-2.09759	0.0359414	0.354384	NCKAP1	chr2	0.780182	1.00694	1.60529	0.693193	1.0678	0.699328
ENSG00000061794	5263.39	0.058813	0.308043	0.190925	0.848585	0.977681	MRPS35	chr12	48.9696	49.1385	51.8858	74.2113	56.0303	43.5297
ENSG00000061918	9.76916	5.84105	3.38983	1.72311	0.0848688	0.503238	GUCY1B3	chr4	0	0	0.006926	0	0	0.307325
ENSG00000061936	2404.27	0.0317645	0.424446	0.0748375	0.940344	0.990694	SFSWAP	chr12	8.75798	4.33948	6.5903	3.70827	5.31029	4.62715
ENSG00000061938	291.874	0.984602	0.551025	1.78686	0.0739607	0.476961	TNK2	chr3	0.508076	0.571961	0.833113	1.1014	0.932483	1.42848
ENSG00000061987	1070.42	-0.802259	0.393883	-2.03679	0.0416706	0.374682	MON2	chr12	2.21252	3.84428	6.07496	1.49816	5.28261	1.20166
ENSG00000062038	19333.7	-0.674475	0.485527	-1.38916	0.164784	0.64784	CDH3	chr16	139.347	36.2789	60.4721	67.7668	41.2255	82.9897
ENSG00000062096	2.09516	1.68707	3.84141	0.439181	0.660531	NA	ARSF	chrX	0	0.015495	0	0.033651	0	0
ENSG00000062194	11132.2	-0.920598	0.331763	-2.77487	0.00552241	0.150838	GPBP1	chr5	58.9563	48.41	53.2109	33.5967	47.0395	28.008
ENSG00000062282	32.5416	1.46323	1.04845	1.39561	0.162832	0.645571	DGAT2	chr11	0.014837	0.031174	0.078289	0.076831	0.161117	0.154658
ENSG00000062370	7.89391	-2.15391	2.39619	-0.898889	0.368712	NA	ZNF112	chr19	0.015363	0.101708	0.06044	0.023443	0	0
ENSG00000062485	2197.38	-0.0438793	0.366353	-0.119773	0.904663	0.986094	CS	chr12	21.1572	11.935	14.6313	5.92626	8.10868	20.9308
ENSG00000062524	47.4475	-0.757718	1.38045	-0.548894	0.583078	0.925371	LTK	chr15	0.1959	0.521825	0.253473	0.294849	0	0.330997
ENSG00000062582	0.244759	-1.49233	4.0557	-0.367959	0.712904	NA	MRPS24	chr7	0.177255	0.215106	2.55023	0	0	0
ENSG00000062598	561.641	-0.168334	0.416281	-0.404376	0.685936	0.948411	ELMO2	chr20	1.87842	1.44603	1.30122	1.1226	1.72198	1.50331
ENSG00000062650	9248.23	-0.54729	0.277366	-1.97317	0.0484762	0.400603	WAPL	chr10	32.4524	29.8251	27.031	29.4055	21.1785	18.5638
ENSG00000062716	588.452	0.769521	0.419911	1.83258	0.0668646	0.457893	VMP1	chr17	2.09925	1.53686	3.73225	3.99976	4.11948	5.24391
ENSG00000062725	785.105	0.404532	0.446882	0.905233	0.365342	0.831101	APPBP2	chr17	1.30108	0.839707	1.22285	2.42767	1.03257	1.63699
ENSG00000062822	341.705	-0.55297	0.733069	-0.754321	0.450656	0.881429	POLD1	chr19	4.46685	1.26038	1.6078	2.37574	1.32297	3.04179
ENSG00000063015	0.201802	-0.840481	4.08047	-0.205976	0.836809	NA	SEZ6	chr17	0.008347	0	0	0	0	0
ENSG00000063046	4320.01	-0.0549459	0.311366	-0.176467	0.859927	0.97971	EIF4B	chr12	23.41	21.6115	24.2194	15.0668	21.1664	15.2995
ENSG00000063127	228.438	0.8027	0.714655	1.1232	0.261353	0.753972	SLC6A16	chr19	1.2329	1.38686	1.21241	2.34271	2.35145	2.49689
ENSG00000063169	1801.3	0.636883	0.562825	1.13158	0.25781	0.751898	BICRA	chr19	4.42529	6.45007	0.932123	1.99378	17.5916	9.30621
ENSG00000063176	285.088	1.35667	0.705747	1.92231	0.0545663	0.421564	SPHK2	chr19	0.992381	0.327892	0.19165	0.846354	1.81733	2.26827
ENSG00000063177	346.491	-0.8565	0.809336	-1.05827	0.28993	0.774603	RPL18	chr19	1.29393	1.12627	9.09364	1.31712	0.977295	2.17163
ENSG00000063180	3.36724	-5.16553	3.46702	-1.48991	0.136249	NA	CA11	chr19	0.185681	0.10237	0.065651	0	0	0
ENSG00000063241	70.7554	0.987883	0.812558	1.21577	0.224073	0.723138	ISOC2	chr19	0.334489	0.30742	0.261535	0.452327	0.254285	0.591244
ENSG00000063244	501.374	-0.414056	0.437933	-0.945478	0.344415	0.814978	U2AF2	chr19	1.82872	1.96862	3.35938	1.4003	3.03963	2.22819
ENSG00000063245	314.269	0.578014	0.651556	0.887129	0.37501	0.836414	EPN1	chr19	0.212141	0.3437	0.46168	0.171084	0.748026	0.451552
ENSG00000063322	200.631	0.367145	0.508553	0.721941	0.470331	0.889482	MED29	chr19	1.14935	1.77225	0.872739	1.31888	1.95683	1.77911
ENSG00000063438	220.898	-0.639991	0.497871	-1.28546	0.198633	0.692866	AHRR	chr5	0.349983	0.220295	0.253783	0.218299	0.201318	0.280082
ENSG00000063515	0	NA	NA	NA	NA	NA	GSC2	chr22	0	0	0	0	0	0
ENSG00000063587	230.675	0.605798	0.769496	0.787266	0.431126	0.869536	ZNF275	chrX	0.420483	0.635323	0.221245	0.743988	0.159962	1.21011
ENSG00000063601	2474.73	0.590603	0.542705	1.08826	0.276481	0.764886	MTMR1	chrX	1.28228	3.04715	4.12078	3.1488	3.30419	7.63786
ENSG00000063660	360.607	0.874089	0.659725	1.32493	0.185195	0.680696	GPC1	chr2	0.296822	0.243694	1.71456	0.498255	0.136166	8.84988
ENSG00000063761	10.5699	4.01322	3.32311	1.20767	0.227175	0.724812	ADCK1	chr14	0	0	0.002694	0.050685	0	0
ENSG00000063854	247.542	0.697648	0.46173	1.51094	0.130803	0.592398	HAGH	chr16	0.659188	0.44682	0.570753	0.922418	1.22375	0.868995
ENSG00000063978	4568.04	0.699466	0.385892	1.8126	0.0698941	0.468038	RNF4	chr4	24.2673	6.46669	19.916	47.8385	4.505	2.63058
ENSG00000064012	2244.69	-0.173883	0.491086	-0.354078	0.723281	0.954968	CASP8	chr2	7.73255	4.28034	7.95186	8.55788	6.91617	7.24885
ENSG00000064042	508.388	0.142677	2.00711	0.0710856	0.94333	0.990963	LIMCH1	chr4	2.04877	0	1.53589	1.74452	0.053701	0.044
ENSG00000064102	1867.89	-0.155232	0.339969	-0.456607	0.647954	0.941666	INTS13	chr12	4.3832	11.4292	6.74023	4.47406	6.52015	5.26849
ENSG00000064115	779.183	0.231237	0.51328	0.450508	0.652344	0.943247	TM7SF3	chr12	4.07728	5.20256	4.55728	10.119	6.94908	1.91664
ENSG00000064195	0.153734	-0.840481	4.08047	-0.205976	0.836809	NA	DLX3	chr17	0	0	0.012513	0	0	0
ENSG00000064199	211.241	-0.917218	0.663275	-1.38286	0.166707	0.649863	SPA17	chr11	5.28277	1.27769	1.74854	0.701792	2.37386	1.65046
ENSG00000064201	0	NA	NA	NA	NA	NA	TSPAN32	chr11	0	0	0	0	0	0
ENSG00000064205	11.2732	-6.91235	2.95663	-2.33791	0.0193918	0.267979	WISP2	chr20	0	0.058125	0.350347	0	0	0
ENSG00000064218	0.170899	1.08307	4.08047	0.265428	0.79068	NA	DMRT3	chr9	0	0	0	0	0.018246	0
ENSG00000064225	44.1675	-0.100198	1.47829	-0.0677797	0.945961	0.991592	ST3GAL6	chr3	0.013961	0.000702	0.351446	0.032736	0.033389	0.000691
ENSG00000064270	2273.89	-1.11542	0.516595	-2.15918	0.0308364	0.331764	ATP2C2	chr16	22.7993	4.80188	10.2584	5.98282	5.04973	7.53452
ENSG00000064300	26.2208	1.03523	1.90666	0.542953	0.587162	0.927497	NGFR	chr17	0.093954	0	0.007698	0.074037	0.009902	0.164303
ENSG00000064309	197.755	0.367396	0.546535	0.672227	0.501439	0.897065	CDON	chr11	0.159596	0.436656	0.265246	0.351989	0.555088	0.354535
ENSG00000064313	2905.59	0.0373148	0.396841	0.0940296	0.925086	0.988668	TAF2	chr8	9.70229	8.34232	12.6897	13.2387	9.11489	6.2497
ENSG00000064393	4271.81	0.240694	0.356353	0.675436	0.499399	0.896302	HIPK2	chr7	4.74859	3.51813	6.81437	6.38598	6.04954	6.2785
ENSG00000064419	21848.8	-0.106049	0.369751	-0.286811	0.774257	0.967068	TNPO3	chr7	126.948	61.0751	107.328	103.445	101.807	85.5986
ENSG00000064489	0	NA	NA	NA	NA	NA	BORCS8-MEF2B	chr19	0.636023	0.589569	0.426872	0.913797	1.8209	1.51196
ENSG00000064490	249.601	0.394986	0.465997	0.847616	0.396652	0.851177	RFXANK	chr19	2.89294	3.18301	1.70436	4.34602	2.50509	5.71344
ENSG00000064545	127.858	1.20686	0.732848	1.64681	0.0995967	0.533143	TMEM161A	chr19	0.755911	0.462649	0.337975	1.03196	1.13121	1.91152
ENSG00000064547	1.04175	-3.48657	3.94691	-0.883366	0.377038	NA	LPAR2	chr19	0	0.139529	0.021026	0	0	0
ENSG00000064601	130.178	0.294078	0.53494	0.549739	0.582498	0.925356	CTSA	chr20	1.51312	2.06684	0.879103	1.96051	2.11139	1.57468
ENSG00000064607	928.331	0.0512711	0.363823	0.140923	0.887931	0.982677	SUGP2	chr19	3.15095	2.42218	3.07467	2.133	3.22332	1.73062
ENSG00000064651	5152.73	-0.472202	0.452593	-1.04332	0.296798	0.778359	SLC12A2	chr5	6.67915	13.4379	9.33529	9.21681	11.4843	3.76144
ENSG00000064652	7338	-0.164168	0.296376	-0.553918	0.579635	0.924867	SNX24	chr5	53.6331	54.2179	54.2032	62.7356	37.7381	56.1534
ENSG00000064655	617.544	0.322	0.4729	0.680904	0.495932	0.896302	EYA2	chr20	0.872814	0.544548	0.551873	1.27526	0.740339	1.69322
ENSG00000064666	78.4349	0.399739	1.07036	0.373461	0.708805	0.953059	CNN2	chr19	0.105207	1.54423	0.448556	0.500742	0.731996	1.07024
ENSG00000064687	0.153734	-0.840481	4.08047	-0.205976	0.836809	NA	ABCA7	chr19	0	0	0.003709	0	0	0
ENSG00000064692	168.775	-1.12183	0.810747	-1.3837	0.166449	0.649816	SNCAIP	chr5	0.047927	0.011112	1.60652	0.041482	0.036518	0.027919
ENSG00000064703	294.858	-1.14427	0.627317	-1.82408	0.0681404	0.46158	DDX20	chr1	1.51647	1.03725	1.75142	0.715718	0.24078	1.07232
ENSG00000064726	73.8951	0.881451	1.17975	0.747154	0.454971	0.882161	BTBD1	chr15	0.02889	0.905059	0.08368	0.416476	0.246759	0.682562
ENSG00000064763	2895.37	0.17826	0.438244	0.406761	0.684184	0.947786	FAR2	chr12	4.16091	5.12436	2.13005	5.10456	5.22421	14.3994
ENSG00000064787	412.465	0.456313	1.09508	0.416694	0.676902	0.945891	BCAS1	chr20	0.658847	0.053632	0.377658	0.251318	0.024294	1.43778
ENSG00000064835	0	NA	NA	NA	NA	NA	POU1F1	chr3	0	0	0	0	0	0
ENSG00000064886	0	NA	NA	NA	NA	NA	CHI3L2	chr1	0	0	0	0	0	0
ENSG00000064932	152.501	1.17602	0.630307	1.86579	0.0620714	0.446088	SBNO2	chr19	0.0582	0.268461	0.258204	0.345731	0.482205	0.285372
ENSG00000064933	4228.71	-0.34199	0.373007	-0.916846	0.359223	0.82639	PMS1	chr2	4.84255	23.0176	29.915	21.0022	11.5716	7.18459
ENSG00000064961	2429.04	0.252578	0.426961	0.591573	0.554137	0.91774	HMG20B	chr19	20.2142	17.8948	12.8379	12.6435	18.6057	14.101
ENSG00000064989	15.6495	-7.38502	2.98498	-2.47406	NA	NA	CALCRL	chr2	0	0.023914	0.206559	0	0	0
ENSG00000064995	103.847	0.548642	0.824516	0.665411	0.505788	0.899531	TAF11	chr6	0.949481	1.44414	1.2948	1.91624	3.54098	0.532656
ENSG00000064999	1230.99	-0.0454696	0.347528	-0.130837	0.895904	0.983549	ANKS1A	chr6	2.75597	2.35855	2.51438	2.60785	3.7787	2.78662
ENSG00000065000	1049.58	1.33539	0.556935	2.39775	0.0164963	0.250178	AP3D1	chr19	0.906397	0.911888	2.48242	1.36457	5.16906	3.64527
ENSG00000065029	3977.48	-0.0842517	0.445631	-0.189062	0.850044	0.97776	ZNF76	chr6	7.41789	5.38267	15.2294	10.9883	7.74882	11.7244
ENSG00000065054	19.6444	1.48662	1.27777	1.16344	0.24465	0.739803	SLC9A3R2	chr16	0.009954	0.15486	0.048532	0.024365	0.102752	0.668189
ENSG00000065057	2462.4	0.690513	0.290213	2.37933	0.017344	0.255901	NTHL1	chr16	13.0582	16.0794	24.3062	73.6396	57.108	92.9356
ENSG00000065060	760.174	-0.692597	0.393145	-1.76168	0.0781231	0.486939	UHRF1BP1	chr6	2.19576	1.49778	1.66968	1.52208	1.49447	0.853645
ENSG00000065135	3897.02	0.11219	0.302501	0.370875	0.710731	0.953463	GNAI3	chr1	2.51558	3.48843	2.31955	3.77738	3.34314	3.06637
ENSG00000065150	597.486	-0.0941066	0.474982	-0.198127	0.842946	0.977414	IPO5	chr13	1.02669	0.975342	1.66985	2.08261	1.32102	0.939965
ENSG00000065154	39284.7	-0.290236	0.317258	-0.914827	0.360282	0.827153	OAT	chr10	469.183	361.592	324.153	441.563	313.105	328.827
ENSG00000065183	24.4308	0.314659	2.07807	0.151419	0.879645	0.981183	WDR3	chr1	0	0.174148	0.034776	0.024077	0.146466	0
ENSG00000065243	1923.5	0.00713282	0.340392	0.0209547	0.983282	0.997946	PKN2	chr1	4.63729	4.83697	6.60829	4.61291	5.66789	7.28398
ENSG00000065268	295.27	1.0221	0.874357	1.16897	0.242415	0.738522	WDR18	chr19	3.05669	2.10054	0.78007	2.26555	10.8225	0.6228
ENSG00000065308	11997.4	-0.0463032	0.470563	-0.0983997	0.921615	0.987912	TRAM2	chr6	53.6176	17.4439	25.0519	36.6965	43.2609	27.6755
ENSG00000065320	227.195	-0.109856	0.513792	-0.213814	0.830692	0.974936	NTN1	chr17	0.453847	0.311746	0.811462	0.570439	0.76209	0.412178
ENSG00000065325	0.307468	-1.72095	4.04114	-0.425857	0.670212	NA	GLP2R	chr17	0	0	0.004852	0	0	0
ENSG00000065328	10065.3	-0.0557328	0.347386	-0.160435	0.872539	0.979848	MCM10	chr10	61.943	34.5331	33.2045	40.787	49.3859	48.1901
ENSG00000065357	14.6403	-1.4587	2.53413	-0.575622	0.564871	0.921493	DGKA	chr12	0.005392	0.136858	0.120363	0	0.004181	0.056668
ENSG00000065361	18.5291	0.849888	2.27554	0.373488	0.708785	0.953059	ERBB3	chr12	0	0.01579	0.247399	0.009312	0.16288	0
ENSG00000065371	0	NA	NA	NA	NA	NA	ROPN1	chr3	0	0	0	0	0	0
ENSG00000065413	1223.07	-0.475685	0.701583	-0.678017	0.497761	0.896302	ANKRD44	chr2	1.2994	1.1843	4.74399	1.42386	2.76142	1.15929
ENSG00000065427	1061.97	-0.991745	0.622327	-1.59361	0.111024	0.555557	KARS	chr16	5.66234	10.2514	5.78079	7.69041	1.77855	1.9491
ENSG00000065457	3498.57	0.147361	0.504023	0.29237	0.770004	0.965096	ADAT1	chr16	15.6367	3.69895	18.5846	8.64204	17.3178	8.33432
ENSG00000065485	1177.67	0.406149	0.338577	1.19958	0.230304	0.727024	PDIA5	chr3	3.35283	3.42911	10.0941	4.77687	3.07805	3.33298
ENSG00000065491	690.914	0.175025	0.491754	0.35592	0.7219	0.954552	TBC1D22B	chr6	5.44433	3.00705	1.86651	3.68833	5.29281	4.14651
ENSG00000065518	13.4165	-1.01397	1.61939	-0.626147	0.531218	0.910699	NDUFB4	chr3	0.187417	0.133581	0.873143	0.443431	0.148738	0.060926
ENSG00000065526	594.619	1.39599	0.681117	2.04956	0.0404074	0.370863	SPEN	chr1	0.164431	0.601815	0.623482	1.97655	0.395601	1.3121
ENSG00000065534	1682.58	0.199602	0.372544	0.535782	0.592109	0.92886	MYLK	chr3	1.90348	1.99634	2.71002	3.64477	5.03354	3.25771
ENSG00000065548	4511.81	0.190133	0.340783	0.55793	0.576892	0.92468	ZC3H15	chr2	30.4989	47.4828	28.2268	43.1656	40.3153	51.4577
ENSG00000065559	566.096	0.751501	0.488214	1.53929	0.123734	0.581194	MAP2K4	chr17	0.643311	1.43478	2.19325	3.15043	3.82521	0.742109
ENSG00000065600	1937.16	-0.129955	0.536217	-0.242355	0.808505	0.972223	TMEM206	chr1	17.7113	20.6842	4.97476	11.1897	15.9671	16.7181
ENSG00000065609	1103.02	-0.179721	0.44111	-0.407428	0.683694	0.947614	SNAP91	chr6	1.56717	3.04973	1.92998	1.62325	1.84725	2.8795
ENSG00000065613	2071.57	0.67125	0.462182	1.45235	0.146405	0.617576	SLK	chr10	1.90479	4.70193	4.85511	4.21449	8.40221	7.45707
ENSG00000065615	52.1648	1.08924	1.01324	1.07501	0.282371	0.769593	CYB5R4	chr6	0.040824	0.055863	0.007835	0.099319	0.036902	0.11296
ENSG00000065618	2.24216	2.23004	3.86126	0.577541	0.563574	NA	COL17A1	chr10	0.0036	0	0	0.012797	0.039143	0
ENSG00000065621	13.1995	-2.31506	2.34479	-0.987319	0.323486	0.801041	GSTO2	chr10	0.031846	0.123558	0	0.008659	0.021461	0
ENSG00000065665	528.635	0.0684181	0.480256	0.142462	0.886715	0.982677	SEC61A2	chr10	2.90812	2.41833	2.08571	4.66527	1.88995	2.20077
ENSG00000065675	1022.35	-0.0474886	0.329497	-0.144124	0.885402	0.982587	PRKCQ	chr10	6.28838	6.06834	4.30296	6.091	6.99367	5.44077
ENSG00000065717	181.642	1.00518	0.635435	1.58188	0.113676	0.560749	TLE2	chr19	0.359132	0.078827	0.116313	0.484369	0.542053	0.140493
ENSG00000065802	46.0731	2.32329	1.12949	2.05693	0.0396925	0.368765	ASB1	chr2	0.081726	0.021348	0.081881	0.178232	0.057855	0.358149
ENSG00000065809	3693.05	-0.272275	0.372723	-0.730502	0.465083	0.888896	FAM107B	chr10	9.89379	25.758	26.3966	22.692	19.8749	13.0116
ENSG00000065833	892.75	-0.882787	0.576536	-1.53119	0.125722	0.584164	ME1	chr6	6.55292	4.21355	7.8465	7.42326	1.74192	2.40995
ENSG00000065882	2918.42	-0.831102	0.404806	-2.05309	0.0400643	0.369203	TBC1D1	chr4	10.1444	17.4648	7.53054	13.79	1.16023	10.4988
ENSG00000065883	911.088	-0.447392	0.384057	-1.16491	0.244055	0.73969	CDK13	chr7	1.57029	2.61528	2.71604	1.65886	2.44032	2.35176
ENSG00000065911	77.5329	1.7535	0.864095	2.02929	0.0424286	0.377518	MTHFD2	chr2	0.134226	0.614755	0.439667	1.96968	1.64357	2.10905
ENSG00000065923	635.505	0.0421104	0.508651	0.0827882	0.93402	0.989816	SLC9A7	chrX	0.511324	1.08941	1.82852	1.35085	1.50216	1.10865
ENSG00000065970	185.89	1.11666	0.783437	1.42533	0.154061	0.63196	FOXJ2	chr12	0.237889	0.680501	0.155303	0.314366	0.764311	1.42815
ENSG00000065978	1471.13	-0.369955	0.434449	-0.85155	0.394464	0.848844	YBX1	chr1	13.1789	18.4227	21.3703	7.60176	20.0795	23.2666
ENSG00000065989	1651.85	0.535749	0.398191	1.34546	0.178478	0.671411	PDE4A	chr19	0.985981	0.610654	0.645757	1.06909	1.00706	1.61861
ENSG00000066027	192.746	-1.28298	0.713934	-1.79705	0.0723277	0.475064	PPP2R5A	chr1	0.052842	0.223494	0.235242	0.137208	0.04577	0.054857
ENSG00000066032	1739.65	-0.919641	0.388185	-2.36908	0.0178323	0.260741	CTNNA2	chr2	0.320721	0.400693	0.071371	0.294538	0.095416	0.277162
ENSG00000066044	10511.6	-0.197851	0.29321	-0.674777	0.499818	0.896419	ELAVL1	chr19	37.3745	30.9959	46.283	39.2267	40.4648	34.2236
ENSG00000066056	3.43064	-5.18984	3.91915	-1.32422	0.185428	NA	TIE1	chr1	0.033154	0	0	0	0	0
ENSG00000066084	1924.81	0.254176	0.410833	0.618684	0.536125	0.912385	DIP2B	chr12	1.64344	3.43506	4.4453	4.52056	4.6701	3.42159
ENSG00000066117	998.595	0.29227	0.423351	0.690372	0.48996	0.894397	SMARCD1	chr12	2.84327	2.95491	4.79688	2.59462	5.14778	5.80893
ENSG00000066135	1596.54	-0.0584428	0.495816	-0.117872	0.906169	0.986502	KDM4A	chr1	10.9739	3.43467	3.85924	5.92962	5.31989	2.84217
ENSG00000066136	2154.33	0.124795	0.404185	0.308757	0.757507	0.962068	NFYC	chr1	2.31896	1.62055	5.61219	5.53398	0.981388	2.00739
ENSG00000066185	83.0139	-0.246723	1.0473	-0.235581	0.813758	0.972227	ZMYND12	chr1	0.916219	0.697508	0.580394	1.37	0.228918	0.037243
ENSG00000066230	182.71	2.0258	0.734326	2.75873	0.00580273	0.155822	SLC9A3	chr5	0.311413	1.14501	0.836578	1.41632	3.64079	1.29623
ENSG00000066248	139.772	0.868355	0.574243	1.51217	0.13049	0.592398	NGEF	chr2	0.343959	1.20389	0.70425	0.55629	0.985243	2.28452
ENSG00000066279	16414.1	-0.435901	0.28522	-1.5283	0.126439	0.584615	ASPM	chr1	37.162	29.3011	30.0584	29.7512	29.6991	22.5404
ENSG00000066294	0	NA	NA	NA	NA	NA	CD84	chr1	0	0	0	0	0	0
ENSG00000066322	90.2834	0.738585	0.699637	1.05567	0.29112	0.775264	ELOVL1	chr1	0.745352	0.263588	0.518825	0.818663	0.646907	1.00211
ENSG00000066336	0.485532	-0.759168	4.04114	-0.18786	0.850987	NA	SPI1	chr11	0	0	0	0	0	0.01517
ENSG00000066379	632.8	-0.41063	0.490647	-0.836914	0.402641	0.854238	ZNRD1	chr6	66.2726	51.798	18.8909	26.1191	43.2947	46.3424
ENSG00000066382	0	NA	NA	NA	NA	NA	MPPED2	chr11	0	0	0	0	0.001395	0
ENSG00000066405	1305.72	0.0643581	0.375698	0.171303	0.863986	0.979848	CLDN18	chr3	1.63197	1.12005	6.59843	2.21465	1.27102	2.57822
ENSG00000066422	1144.26	-0.62331	0.368711	-1.69051	0.0909307	0.515112	ZBTB11	chr3	2.88189	4.60539	4.92472	3.67813	2.72209	2.45827
ENSG00000066427	1396.8	0.0850707	0.300769	0.282844	0.777296	0.967459	ATXN3	chr14	7.18525	13.3152	4.28271	3.23307	1.33859	2.19956
ENSG00000066455	9138.63	-0.83656	0.360483	-2.32067	0.0203049	0.273292	GOLGA5	chr14	91.2284	72.9043	49.2024	55.5668	37.1583	42.7644
ENSG00000066468	449.45	1.01901	0.90952	1.12038	0.26255	0.755278	FGFR2	chr10	1.06593	0.457609	0.217105	1.42485	0.372623	0.048767
ENSG00000066557	5523.23	-0.756644	0.433164	-1.74678	0.0806749	0.491664	LRRC40	chr1	40.5179	48.1353	44.68	38.5683	13.8566	36.5039
ENSG00000066583	7038.68	-0.195848	0.300824	-0.651037	0.515023	0.903028	ISOC1	chr5	84.2265	65.0125	63.119	83.36	66.3854	62.9678
ENSG00000066629	314.454	-0.173124	0.429499	-0.403083	0.686887	0.948515	EML1	chr14	0.634013	0.625632	0.722937	0.401325	0.392273	0.477607
ENSG00000066651	2953.85	-0.820699	0.445124	-1.84375	0.0652189	0.451541	TRMT11	chr6	24.5141	11.8179	10.5599	2.55909	19.6105	5.87378
ENSG00000066654	10965	-0.0820547	0.348077	-0.235737	0.813636	0.972227	THUMPD1	chr16	48.4953	35.4359	58.7213	29.4874	27.9299	44.8799
ENSG00000066697	314.331	0.190906	0.581035	0.328561	0.742488	0.959031	MSANTD3	chr9	1.03093	1.40877	1.69915	2.44783	1.49111	0.602845
ENSG00000066735	7.61179	3.1502	3.11488	1.01134	0.311855	NA	KIF26A	chr14	0	0	0.015455	0	0.13021	0.006356
ENSG00000066739	1162.65	0.0609929	0.406322	0.15011	0.880678	0.981183	ATG2B	chr14	0.71213	1.4584	1.66837	1.73879	1.58947	1.14142
ENSG00000066777	1818.17	-0.484034	0.435019	-1.11267	0.265849	0.756288	ARFGEF1	chr8	2.45518	13.1444	6.37861	6.16151	8.85436	7.41223
ENSG00000066813	0	NA	NA	NA	NA	NA	ACSM2B	chr16	0	0	0	0	0	0
ENSG00000066827	141.284	-0.577401	1.14945	-0.502328	0.615437	0.934312	ZFAT	chr8	0.487329	0.182765	0.403728	0.934396	0.210937	0.001248
ENSG00000066855	805.981	0.308436	0.366287	0.842061	0.399754	0.852796	MTFR1	chr8	0.69633	4.26122	1.7642	0.440847	0.299707	3.73764
ENSG00000066923	10190.3	0.368175	0.380334	0.968031	0.333029	0.807052	STAG3	chr7	33.8953	128.175	53.51	57.962	71.8877	115.244
ENSG00000066926	44.4385	1.11061	1.00963	1.10002	0.271325	0.760229	FECH	chr18	0.140633	0.024515	0.189782	0.247364	0.153417	0.140913
ENSG00000066933	10991.4	-0.502323	0.311016	-1.6151	0.106289	0.547748	MYO9A	chr15	24.4884	27.8386	16.9369	20.3002	11.126	10.1191
ENSG00000067048	0.768671	-3.0399	3.96135	-0.767389	0.44285	NA	DDX3Y	chrY	0	0	0.056758	0	0	0
ENSG00000067057	846.302	-0.295391	0.412606	-0.715917	0.474043	0.890763	PFKP	chr10	1.22198	1.5055	4.76791	1.60636	1.28778	1.77339
ENSG00000067064	1772.22	0.281686	0.412939	0.682149	0.495144	0.895986	IDI1	chr10	11.2067	19.8058	8.67954	23.6566	15.418	13.4916
ENSG00000067066	36.729	1.33142	0.865289	1.53869	0.123879	0.581346	SP100	chr2	0.015319	0.031381	0.08521	0.236409	0.046938	0.252474
ENSG00000067082	1075.44	0.34947	0.774024	0.451498	0.651631	0.942639	KLF6	chr10	0.505497	9.98852	2.32364	3.93153	7.24676	4.65301
ENSG00000067113	6.2924	2.07421	2.58304	0.803011	0.421968	NA	PLPP1	chr5	0.007658	0.019907	0.023164	0.228542	0.24482	0.285043
ENSG00000067141	5776.57	-0.0428988	0.323695	-0.132528	0.894566	0.983233	NEO1	chr15	7.59103	5.94326	5.71312	7.6241	5.70555	5.35587
ENSG00000067167	1228.44	0.249356	0.396349	0.629133	0.529262	0.910246	TRAM1	chr8	3.71081	10.7206	6.05002	5.93597	9.6118	8.21741
ENSG00000067177	5.72919	1.6502	3.35631	0.49167	0.622953	NA	PHKA1	chrX	0	0	0.035355	0.090868	0.003452	0
ENSG00000067182	25.3701	2.94352	1.40827	2.09017	0.0366023	0.35868	TNFRSF1A	chr12	0	0.10492	0.030896	0.15381	0.472847	0.127777
ENSG00000067191	17.0858	6.65797	1.87306	3.5546	0.000378556	0.0319714	CACNB1	chr17	0	0	0.003532	0.239166	0.042589	0.089119
ENSG00000067208	1019.95	0.00199266	0.500221	0.00398356	0.996822	0.999543	EVI5	chr1	1.23664	1.99184	0.766847	0.884591	1.65776	2.05882
ENSG00000067221	145.516	-0.840807	3.11256	-0.270133	0.787058	0.969754	STOML1	chr15	0.934527	0	0.038166	0.212743	0	0.661396
ENSG00000067225	3161.08	0.715545	0.493924	1.44869	0.147423	0.618804	PKM	chr15	5.77232	11.4151	5.71633	17.1463	12.6377	14.4265
ENSG00000067248	8546.24	-0.0103874	0.299386	-0.0346957	0.972322	0.996639	DHX29	chr5	27.4001	39.3655	34.2337	31.1484	43.9089	37.979
ENSG00000067334	10199.1	-0.748819	0.304725	-2.45736	0.0139961	0.232534	DNTTIP2	chr1	37.7764	29.4704	35.3845	23.7894	22.123	17.6563
ENSG00000067365	71.1662	0.0296082	0.632262	0.0468291	0.962649	0.995598	METTL22	chr16	0.522398	0.458955	0.357737	0.225602	0.337194	0.241131
ENSG00000067369	620.405	-1.03464	0.513913	-2.01326	0.0440877	0.384897	TP53BP1	chr15	0.809196	1.10129	3.56813	1.23659	0.474	0.62806
ENSG00000067445	13.143	-1.26348	2.78923	-0.452986	0.650559	0.942069	TRO	chrX	0.224792	0	0	0	0.021816	0.036956
ENSG00000067533	2742.71	-0.798985	0.307749	-2.59622	0.00942556	0.191934	RRP15	chr1	9.3351	9.08028	6.39663	5.10744	5.80332	5.35269
ENSG00000067560	18506.3	0.358403	0.38112	0.940396	0.347015	0.817035	RHOA	chr3	136.572	184.941	63.3614	234.384	156.293	186.798
ENSG00000067596	254.25	-0.329761	0.523655	-0.62973	0.528872	0.909967	DHX8	chr17	0.383565	0.836971	0.640298	0.744607	0.570163	0.350631
ENSG00000067601	11.0403	-2.18333	1.81815	-1.20085	0.229808	0.727024	PMS2P4	chr7	0.339739	0.377954	0.107398	0.107287	0.103824	0
ENSG00000067606	74.5641	0.908094	0.690881	1.3144	0.188711	0.683002	PRKCZ	chr1	0.067721	0.059242	3.05412	0.10964	5.04976	0.132615
ENSG00000067646	0.307468	-1.72095	4.04114	-0.425857	0.670212	NA	ZFY	chrY	0	0	0.002852	0	0	0
ENSG00000067704	1781.89	-0.645763	0.51879	-1.24475	0.213224	0.709595	IARS2	chr1	19.1922	5.66706	7.2358	5.47241	9.8704	5.67367
ENSG00000067715	1031.69	-0.426148	0.337411	-1.26299	0.206592	0.703534	SYT1	chr12	0.361664	1.04502	1.53962	0.182032	0.142292	0.130676
ENSG00000067798	2663.14	-0.151482	0.284781	-0.531923	0.594779	0.929719	NAV3	chr12	0.732919	0.595568	1.31605	0.729255	0.505781	0.621973
ENSG00000067829	82.1682	-0.056753	0.780488	-0.0727148	0.942033	0.990694	IDH3G	chrX	0.310402	0.356514	0.250373	0.403759	0.461345	0.100809
ENSG00000067836	146.422	0.606971	0.654224	0.927772	0.353526	0.822052	ROGDI	chr16	0.694828	0.495572	1.24433	2.79073	0.450671	1.06503
ENSG00000067840	0.153734	-0.840481	4.08047	-0.205976	0.836809	NA	PDZD4	chrX	0	0	0.007607	0	0	0
ENSG00000067842	0.170899	1.08307	4.08047	0.265428	0.79068	NA	ATP2B3	chrX	0	0	0	0	0.003904	0
ENSG00000067900	6020.81	-0.274086	0.38969	-0.703343	0.481842	0.892813	ROCK1	chr18	6.18568	14.0751	13.5578	10.0701	10.0602	11.7433
ENSG00000067955	2927.19	-0.540297	0.454518	-1.18872	0.234548	0.730598	CBFB	chr16	14.1885	3.7152	22.7628	2.09848	5.33962	6.71194
ENSG00000067992	304.198	1.14377	0.582449	1.96373	0.0495609	0.404515	PDK3	chrX	2.48516	0.624249	2.00778	4.35471	3.68906	4.00932
ENSG00000068001	333.147	0.805163	0.441412	1.82406	0.0681423	0.46158	HYAL2	chr3	1.96284	1.02176	3.44779	3.82965	2.84325	4.75786
ENSG00000068024	227.704	1.03679	0.642187	1.61447	0.106425	0.547921	HDAC4	chr2	0.468089	0.357069	0.039884	0.363712	0.490959	0.151528
ENSG00000068028	14.6809	-1.13226	2.09828	-0.539612	0.589464	0.927789	RASSF1	chr3	0.046446	0.117789	0.005249	0.01906	0.088326	0
ENSG00000068078	0.324633	0.1213	4.08047	0.0297269	0.976285	NA	FGFR3	chr4	0	0	0.004278	0	0.007045	0
ENSG00000068079	62.9145	0.731844	1.0267	0.712811	0.475963	0.890994	IFI35	chr17	0.227404	1.71574	0.627925	0.919793	0.40649	2.58167
ENSG00000068097	79.7026	0.817049	1.08357	0.754037	NA	NA	HEATR6	chr17	0.017794	0.587424	0.042809	0.287344	0.325527	0.280871
ENSG00000068120	486.615	0.471061	0.552433	0.852702	0.393825	0.848311	COASY	chr17	4.35699	2.04874	1.61643	3.96766	3.88469	3.16131
ENSG00000068137	1.69108	-4.17597	3.93173	-1.06212	0.288181	NA	PLEKHH3	chr17	0	0	0.094255	0	0	0
ENSG00000068305	430.959	0.0671736	0.633378	0.106056	0.915538	0.987912	MEF2A	chr15	0.110137	0.444878	3.00255	0.23686	0.206972	0.136252
ENSG00000068308	1282.08	0.4935	0.373973	1.31961	0.186965	0.681866	OTUD5	chrX	8.13494	6.79131	9.08048	6.36752	12.39	7.12608
ENSG00000068323	601.467	0.0643803	0.412384	0.156117	0.875941	0.980595	TFE3	chrX	2.74664	1.88072	2.58993	3.492	3.54233	1.86674
ENSG00000068354	179.463	0.409228	0.616576	0.66371	0.506876	0.899536	TBC1D25	chrX	0.921373	0.670039	0.372433	1.55102	0.759994	0.67942
ENSG00000068366	320.141	0.591975	0.718065	0.824403	0.409711	0.858523	ACSL4	chrX	0.102975	0.128759	0.464276	0.283208	0.125671	0.627851
ENSG00000068383	95.9145	1.0748	0.736703	1.45893	0.144585	0.614851	INPP5A	chr10	0.260078	0.389944	0.366821	1.61717	0.699825	0.216696
ENSG00000068394	186.682	-0.485981	0.625234	-0.777279	0.436994	0.872783	GPKOW	chrX	2.73585	1.56162	2.53851	2.26836	0.79151	2.44067
ENSG00000068400	899.09	-0.274079	0.461542	-0.593833	0.552624	0.917139	GRIPAP1	chrX	3.85177	2.97139	1.5922	1.71625	3.12646	2.89675
ENSG00000068438	134.657	0.955337	0.752451	1.26963	0.204215	0.700544	FTSJ1	chrX	0.585781	0.769179	1.00883	3.23814	0.619085	0.95677
ENSG00000068489	1410.54	0.115057	0.320544	0.358942	0.719639	0.954067	PRR11	chr17	11.1265	8.34069	8.28697	16.9078	9.72404	13.3786
ENSG00000068615	290.388	0.914387	1.135	0.805624	0.42046	0.864765	REEP1	chr2	0.324053	0.020824	2.39293	2.63189	0.246994	1.4554
ENSG00000068650	1544.47	0.0551473	0.384058	0.143591	0.885823	0.982677	ATP11A	chr13	0.745097	0.473284	0.56012	2.9887	3.1675	5.26045
ENSG00000068654	466.259	-0.159853	0.439593	-0.363639	0.716128	0.953669	POLR1A	chr2	0.586639	0.972303	0.546492	0.579175	0.902433	0.714394
ENSG00000068697	6376.85	0.263167	0.374177	0.703322	0.481855	0.892813	LAPTM4A	chr2	60.7017	72.0538	47.4448	92.279	105.785	49.0821
ENSG00000068724	42.8932	0.399725	0.814442	0.490796	0.62357	0.936397	TTC7A	chr2	0.024899	0.027737	0.010773	0.045042	0.054	0.033145
ENSG00000068745	214.466	1.51068	0.705827	2.14029	0.0323311	0.340053	IP6K2	chr3	0.098359	0.752512	0.172238	0.10667	0.532654	0.811406
ENSG00000068781	0	NA	NA	NA	NA	NA	STON1-GTF2A1L	chr2	4.1598	5.783	5.83499	4.53681	3.56629	4.14214
ENSG00000068784	208.593	-1.74141	0.826169	-2.10782	0.0350468	0.352434	SRBD1	chr2	1.58453	1.05046	0.867812	0.43206	0.728102	0.034359
ENSG00000068796	763.638	-0.552498	0.329327	-1.67766	0.0934143	0.518619	KIF2A	chr5	0.553368	4.67162	3.31463	0.551053	0.629607	0.439182
ENSG00000068831	2.54522	1.20784	3.80834	0.317156	0.751125	NA	RASGRP2	chr11	0	0	0.0157	0.032363	0.001494	0
ENSG00000068878	917.551	0.0535805	0.506221	0.105844	0.915706	0.987912	PSME4	chr2	0.732816	2.49201	1.93316	2.17509	2.35251	1.51375
ENSG00000068885	2.88585	-2.23253	2.50597	-0.890884	0.372991	NA	IFT80	chr3	0.214922	0.227067	0.015406	0.316978	0.185603	0.0195
ENSG00000068903	46.9267	0.00171177	1.1239	0.00152307	0.998785	0.99996	SIRT2	chr19	0.035944	0.116004	0.098966	0.115952	0.333055	0.098241
ENSG00000068912	1597.84	-0.728707	0.356041	-2.04669	0.0406882	0.37185	ERLEC1	chr2	15.458	11.4395	16.1808	10.4458	12.0981	6.73868
ENSG00000068971	302.103	0.181004	0.612262	0.295631	0.767512	0.963717	PPP2R5B	chr11	3.06936	0.602405	1.19271	2.36024	1.169	2.04155
ENSG00000068976	2.68904	-1.04956	3.80323	-0.275967	0.782574	NA	PYGM	chr11	0.032308	0	0	0.008255	0	0.017128
ENSG00000068985	0	NA	NA	NA	NA	NA	PAGE1	chrX	0	0	0	0	0	0
ENSG00000069011	30.8723	-2.51347	1.76502	-1.42405	0.154433	0.632702	PITX1	chr5	0.024239	0.321506	2.23824	0.008969	0.160889	0
ENSG00000069018	1072.2	-0.503442	0.762234	-0.660483	0.508944	0.900145	TRPC7	chr5	12.2691	5.55858	2.40043	10.6245	3.09938	4.45343
ENSG00000069020	7390.98	0.237122	0.386161	0.614049	0.539183	0.912526	MAST4	chr5	0.907453	1.18223	0.796185	0.982484	1.22121	1.21142
ENSG00000069122	0	NA	NA	NA	NA	NA	ADGRF5	chr6	0	0	0	0	0	0
ENSG00000069188	984.044	0.23452	0.441853	0.530764	0.595583	0.930049	SDK2	chr17	1.26522	1.14636	0.844927	2.14079	0.98963	1.34948
ENSG00000069206	2.61348	-4.80353	3.92295	-1.22447	0.220775	NA	ADAM7	chr8	0	0	0.03973	0	0	0
ENSG00000069248	18900.8	-1.03729	0.485914	-2.13472	0.0327836	0.342101	NUP133	chr1	136.159	46.7356	80.6226	72.6314	48.2783	32.5951
ENSG00000069275	678.039	-0.207593	0.455426	-0.455823	0.648517	0.941666	NUCKS1	chr1	1.47295	2.13302	2.58678	1.22119	2.85253	1.93625
ENSG00000069329	4676.53	-0.273851	0.356852	-0.76741	0.442838	0.87766	VPS35	chr16	15.1872	6.59703	16.1865	8.74118	37.1451	8.21792
ENSG00000069345	3171.97	-0.106319	0.420985	-0.252548	0.800618	0.971941	DNAJA2	chr16	24.5903	19.0163	12.8205	23.9989	11.9227	23.573
ENSG00000069399	21.2064	4.52816	1.43122	3.16384	0.00155705	0.0767847	BCL3	chr19	0	0.003586	0.074152	0.93154	1.0464	0.108204
ENSG00000069424	8.6746	-1.86651	1.92438	-0.969929	0.332082	0.806232	KCNAB2	chr1	0.002959	0.006293	0.002291	0.00011	0	0.001545
ENSG00000069431	7.94307	-6.40982	2.97772	-2.15259	0.0313507	NA	ABCC9	chr12	0.003366	0.067374	0.000654	0	0	0
ENSG00000069482	51.065	0.14951	0.858773	0.174097	0.861789	0.979848	GAL	chr11	0.236343	1.1646	0.229593	0.993617	0.89682	0.446989
ENSG00000069493	16.89	2.94807	2.15149	1.37025	0.17061	0.656506	CLEC2D	chr12	0.048636	0.08407	0.06523	0.13286	0.04855	0.150674
ENSG00000069509	2446.39	0.204554	0.385261	0.53095	0.595453	0.930049	FUNDC1	chrX	23.1912	28.6932	47.3235	29.1268	51.2061	44.0086
ENSG00000069535	38.0798	3.10517	1.66602	1.86383	NA	NA	MAOB	chrX	0.03754	0	0.089641	1.54872	0.051231	0.050176
ENSG00000069667	209.063	-0.37527	0.579411	-0.647675	0.517195	0.904414	RORA	chr15	0.016055	0.061676	0.023627	0.026461	0.020697	0.032116
ENSG00000069696	0	NA	NA	NA	NA	NA	DRD4	chr11	0	0	0	0	0.012479	0
ENSG00000069702	736.571	0.68914	0.642629	1.07238	0.283551	0.769998	TGFBR3	chr1	0.635709	0.681675	0.239815	7.53796	0.260591	0.321196
ENSG00000069712	0	NA	NA	NA	NA	NA	KIAA1107	chr1	2.07137	2.42359	2.45318	1.95814	2.45526	1.33228
ENSG00000069764	2.84902	5.04722	3.92262	1.2867	0.198201	NA	PLA2G10	chr16	0	0.028519	0	0	0	0.29373
ENSG00000069812	0	NA	NA	NA	NA	NA	HES2	chr1	0	0	0	0	0	0
ENSG00000069849	2598.37	0.78921	0.435614	1.81172	0.0700299	0.468727	ATP1B3	chr3	14.4976	16.0954	11.1264	25.5181	26.6422	12.5438
ENSG00000069869	522.062	-0.224117	0.368753	-0.60777	0.54334	0.913671	NEDD4	chr15	0.45545	0.740138	1.71985	0.728579	0.609677	0.707193
ENSG00000069943	34.8031	-0.779614	1.30679	-0.596586	0.550784	0.916268	PIGB	chr15	0.47834	0.532189	0.5793	0.434652	0.532806	0.997521
ENSG00000069956	4344.3	-0.544865	0.390971	-1.39362	0.163432	0.645861	MAPK6	chr15	15.1255	14.5295	19.6209	13.4812	15.404	1.45852
ENSG00000069966	460.512	-0.0967092	0.390741	-0.247502	0.80452	0.972204	GNB5	chr15	3.6935	4.49857	4.73722	2.79345	4.93773	8.94907
ENSG00000069974	1035.07	-0.276065	0.43372	-0.636506	0.524447	0.907901	RAB27A	chr15	1.94156	1.52817	3.34083	0.387711	0.256789	0.157865
ENSG00000069998	140.735	1.24643	0.984578	1.26595	0.20553	0.702482	HDHD5	chr22	0.444037	0.141598	1.55579	0.54304	1.93104	0.109111
ENSG00000070010	846.607	0.915756	0.429197	2.13365	0.0328715	0.342569	UFD1	chr22	3.31165	3.32052	7.41896	5.33876	3.79614	4.58839
ENSG00000070018	4977.1	0.0269217	0.291744	0.0922785	0.926477	0.98887	LRP6	chr12	6.8037	10.819	8.9714	10.0172	10.8507	9.41351
ENSG00000070019	247.301	1.6785	0.576388	2.9121	0.0035901	0.122833	GUCY2C	chr12	1.16166	1.10207	0.522605	2.84695	2.3535	3.58069
ENSG00000070031	0	NA	NA	NA	NA	NA	SCT	chr11	0	0	0	0	0	0
ENSG00000070047	1022.41	0.34809	0.343181	1.01431	0.310437	0.790551	PHRF1	chr11	2.36518	3.62705	3.44229	4.07136	4.43145	5.15081
ENSG00000070061	205.634	1.18962	0.50983	2.33336	0.0196292	0.269312	ELP1	chr9	0.221083	0.490475	0.52185	0.951029	1.01143	0.922598
ENSG00000070081	1910.08	-0.52003	0.335756	-1.54883	0.121422	0.576544	NUCB2	chr11	13.0181	8.63303	13.8018	7.5002	1.68668	1.34086
ENSG00000070087	2262.77	0.2498	0.349451	0.714836	0.47471	0.890763	PFN2	chr3	23.3262	28.2734	15.4145	27.7736	34.5263	27.5078
ENSG00000070159	1077.86	-0.279237	0.361773	-0.771858	0.440198	0.875325	PTPN3	chr9	1.99214	1.78182	2.26721	2.04012	2.24953	1.10206
ENSG00000070182	1309.16	-0.0223833	0.37036	-0.0604366	0.951808	0.993015	SPTB	chr14	1.78238	1.26476	2.11163	1.62971	2.28908	1.82292
ENSG00000070190	2048.77	-1.48557	0.646225	-2.29884	0.021514	0.282026	DAPP1	chr4	13.4716	2.63346	20.4862	6.0359	6.26211	2.95149
ENSG00000070193	0	NA	NA	NA	NA	NA	FGF10	chr5	0	0	0.010301	0	0	0
ENSG00000070214	160.298	0.532116	0.578613	0.91964	0.357761	0.825388	SLC44A1	chr9	0.137235	0.108692	0.12219	0.335849	0.120373	0.143997
ENSG00000070269	299.285	0.323111	0.472746	0.683477	0.494306	0.895627	TMEM260	chr14	0.871228	3.46059	1.56331	2.63801	2.14029	3.74147
ENSG00000070366	355.057	-0.158862	0.627738	-0.25307	0.800214	0.971754	SMG6	chr17	1.1117	2.13302	1.39086	0.983196	0.873113	7.10117
ENSG00000070367	2874.84	-0.231666	0.394194	-0.587697	0.556736	0.918998	EXOC5	chr14	8.36667	2.82738	14.5011	4.9374	4.12746	2.74187
ENSG00000070371	24.49	-0.28099	2.02496	-0.138764	0.889637	0.982845	CLTCL1	chr22	0.055318	0	0.096623	0.08197	0.057987	0
ENSG00000070388	0	NA	NA	NA	NA	NA	FGF22	chr19	0	0	0	0	0	0
ENSG00000070404	274.031	1.62782	0.434158	3.74938	0.000177275	0.020456	FSTL3	chr19	0.312604	0.483149	0.55531	1.67763	1.36294	1.66376
ENSG00000070413	1487.5	0.553287	0.291282	1.89949	0.0575003	0.43028	DGCR2	chr22	3.9819	4.12367	3.73539	7.94639	5.78761	4.31351
ENSG00000070423	6003.71	0.278397	0.314102	0.886328	0.375441	0.83644	RNF126	chr19	44.2312	66.518	69.393	56.6483	59.1093	112.405
ENSG00000070444	815.453	0.233532	0.449194	0.519892	0.603139	0.931289	MNT	chr17	2.42819	2.43692	2.63082	2.85812	3.55844	4.42054
ENSG00000070476	875.992	0.441142	0.385034	1.14572	0.251911	0.748539	ZXDC	chr3	2.71507	2.61913	3.13061	4.40586	7.59042	2.51218
ENSG00000070495	774.381	0.205256	0.416916	0.492319	0.622494	0.936164	JMJD6	chr17	3.88892	3.13662	4.51674	9.08328	9.78847	8.39561
ENSG00000070501	11984.8	0.0511822	0.282181	0.181381	0.856069	0.978442	POLB	chr8	54.7787	79.6201	57.9323	77.4773	76.882	51.147
ENSG00000070526	7.31767	1.90989	3.68567	0.518194	0.604323	NA	ST6GALNAC1	chr17	0	0.01289	0.023439	0.123093	0	0
ENSG00000070540	256.566	-0.545496	0.726257	-0.751106	0.452589	0.881855	WIPI1	chr17	1.12236	4.58485	0.597527	1.84561	0.614775	1.4592
ENSG00000070601	0.495532	1.02626	4.03703	0.254211	0.799332	NA	FRMPD1	chr9	0	0	0.002303	0	0.005376	0
ENSG00000070610	99.8581	1.88375	0.638514	2.9502	0.00317564	0.115454	GBA2	chr9	0.208982	0.193858	0.353468	0.651641	0.610335	0.826401
ENSG00000070614	123.394	0.652667	0.604555	1.07958	0.280329	0.767523	NDST1	chr5	0.497067	0.038097	0.51902	0.056258	0.110222	0.070861
ENSG00000070669	1.28452	3.90222	3.94175	0.989973	0.322187	NA	ASNS	chr7	0.784186	0.144892	0.766582	2.13494	0.816194	1.77984
ENSG00000070718	2718.27	0.202083	0.537351	0.376072	0.706863	0.953059	AP3M2	chr8	13.5882	7.3877	12.399	25.0806	10.3793	3.83497
ENSG00000070729	1.45542	4.08174	3.93767	1.03659	0.299928	NA	CNGB1	chr16	0	0	0	0.01703	0.000725	0
ENSG00000070731	1.7733	-0.26694	3.82826	-0.0697289	0.944409	NA	ST6GALNAC2	chr17	0.096747	0	0.095005	0.066494	0	0
ENSG00000070748	0	NA	NA	NA	NA	NA	CHAT	chr10	0	0	0	0	0	0
ENSG00000070756	2080.81	-0.326387	0.33952	-0.96132	0.336391	0.809535	PABPC1	chr8	13.7577	9.89427	14.4052	9.86853	7.19964	10.1233
ENSG00000070759	247.453	0.775719	0.438656	1.7684	0.0769939	0.484779	TESK2	chr1	0.09178	0.166924	1.04646	0.198089	0.269581	0.248085
ENSG00000070761	1064.44	-0.525199	0.483868	-1.08542	0.277736	0.766383	CFAP20	chr16	22.3545	8.62921	16.6935	13.8698	11.662	6.53905
ENSG00000070770	6420.75	-0.126998	0.580299	-0.21885	0.826767	0.974806	CSNK2A2	chr16	13.875	38.5999	118.325	11.7321	20.6277	23.5242
ENSG00000070778	3407.87	1.27859	0.400801	3.19008	0.00142232	0.074259	PTPN21	chr14	3.09868	6.66425	3.10395	14.4167	6.93931	4.02307
ENSG00000070785	878.735	-0.329272	0.47265	-0.696649	0.486022	0.89411	EIF2B3	chr1	5.70918	9.35794	7.49493	0.977607	0.602526	0.272214
ENSG00000070808	1415.55	-0.154491	0.333469	-0.463286	0.643159	0.940552	CAMK2A	chr5	4.3927	3.97468	4.95774	3.67765	5.89411	4.40076
ENSG00000070814	16606.6	0.391334	0.418643	0.934768	0.349908	0.819633	TCOF1	chr5	44.2911	19.4689	21.1722	41.1573	31.3524	45.3394
ENSG00000070831	4120.16	-0.245827	0.299847	-0.819843	0.412306	0.860524	CDC42	chr1	3.00186	5.79828	8.20153	22.6684	2.89063	4.21859
ENSG00000070882	3385.41	-0.173877	0.324586	-0.535688	0.592174	0.92886	OSBPL3	chr7	17.4203	12.3132	14.553	14.1119	9.61265	10.2235
ENSG00000070886	123.704	0.516071	0.938759	0.549738	0.582499	0.925356	EPHA8	chr1	0.665273	0.256695	0.104795	1.23191	0.302018	0.189185
ENSG00000070915	0	NA	NA	NA	NA	NA	SLC12A3	chr16	0	0	0	0	0	0
ENSG00000070950	1366.77	-0.749385	0.315694	-2.37377	0.0176075	0.258417	RAD18	chr3	4.41168	3.04602	2.10731	1.41724	2.27646	1.51485
ENSG00000070961	37144.8	-0.0644412	0.287247	-0.224341	0.822492	0.973714	ATP2B1	chr12	95.413	70.3724	109.354	101.024	100.332	78.9068
ENSG00000070985	63.5656	1.95686	1.13898	1.71807	0.085783	0.505645	TRPM5	chr11	0.182545	0.158594	0.804982	2.44528	0.183042	1.09604
ENSG00000071051	2111.07	0.242328	0.367414	0.659549	0.509543	0.900651	NCK2	chr2	0.707506	3.09975	9.05705	3.76045	0.811504	0.504228
ENSG00000071054	1646.74	-0.0270576	0.488724	-0.0553638	0.955849	0.994154	MAP4K4	chr2	1.47011	1.278	0.948746	0.551816	0.826679	1.47292
ENSG00000071073	2871.35	-0.21841	0.457993	-0.476884	0.633445	0.937305	MGAT4A	chr2	3.6251	9.38098	3.44919	4.79467	5.11359	2.36645
ENSG00000071082	396.615	-0.419953	0.533301	-0.787459	0.431013	0.869536	RPL31	chr2	6.66162	5.61782	12.0833	3.87325	3.69488	9.9025
ENSG00000071127	4901.82	-0.0616802	0.415198	-0.148556	0.881904	0.981627	WDR1	chr4	7.30701	2.91438	21.4391	5.93269	5.51696	4.58968
ENSG00000071189	2260.72	-0.566985	0.368549	-1.53842	0.123945	0.581354	SNX13	chr7	15.9423	7.79695	15.7253	20.5698	15.1198	10.9863
ENSG00000071203	0	NA	NA	NA	NA	NA	MS4A12	chr11	0	0	0	0	0	0
ENSG00000071205	4164.28	-0.594644	0.33277	-1.78695	0.0739456	0.476961	ARHGAP10	chr4	6.69459	4.30795	4.74059	5.24888	3.84969	3.04771
ENSG00000071242	856.458	0.0907779	0.554836	0.163612	0.870036	0.979848	RPS6KA2	chr6	0.119509	0.062307	0.200886	0.270236	0.211048	0.10236
ENSG00000071243	14067.9	-0.659493	0.36974	-1.78367	0.074478	0.478221	ING3	chr7	150.336	122.285	100.663	106.753	108.525	63.0427
ENSG00000071246	79.2881	0.374171	0.841528	0.444633	0.656585	0.943804	VASH1	chr14	0.843083	1.09766	1.55849	0.960397	0.418519	3.60244
ENSG00000071282	222.409	0.637597	0.550205	1.15884	0.246523	0.742639	LMCD1	chr3	1.62691	1.34256	0.23918	2.73529	0.507471	0.675877
ENSG00000071462	1729.31	0.33999	0.329007	1.03338	0.301424	0.781827	BUD23	chr7	5.06542	3.32222	8.7952	10.5575	14.0076	11.944
ENSG00000071537	2026.63	-0.913834	0.458189	-1.99445	0.0461032	0.391663	SEL1L	chr14	3.14081	9.54742	3.97465	3.29478	6.21341	5.40967
ENSG00000071539	7135.02	0.0297057	0.321451	0.0924114	0.926371	0.98887	TRIP13	chr5	46.2499	34.8963	35.5411	64.1294	26.843	44.9334
ENSG00000071553	789.841	-0.248157	0.607853	-0.408252	0.683089	0.947457	ATP6AP1	chrX	7.96276	9.47105	2.38553	5.28461	2.03195	2.85126
ENSG00000071564	3091.2	0.996744	0.36976	2.69565	0.00702515	0.167971	TCF3	chr19	4.75683	8.26497	12.6199	10.6906	44.584	15.3927
ENSG00000071575	75.0964	1.95816	1.19247	1.6421	0.100568	0.534972	TRIB2	chr2	0.540505	0.006095	0.0734	0.698333	0.518011	0.485317
ENSG00000071626	366.733	1.23887	0.488427	2.53644	0.0111985	0.210537	DAZAP1	chr19	0.181944	0.413936	1.6703	1.47982	1.51699	0.760827
ENSG00000071655	67.3318	-0.31226	1.22119	-0.255702	0.798181	0.971524	MBD3	chr19	0.008707	1.51814	0.36192	0.163377	0.153958	0.265523
ENSG00000071677	0	NA	NA	NA	NA	NA	PRLH	chr2	0	0	0	0	0	0
ENSG00000071794	1393.07	0.40582	0.414675	0.978644	0.327756	0.80328	HLTF	chr3	3.06446	3.89937	2.96053	7.32495	2.76162	4.95181
ENSG00000071859	177.32	1.55537	0.716288	2.17144	0.0298983	0.328461	FAM50A	chrX	1.16142	0.423458	0.349269	2.31883	1.66647	1.74745
ENSG00000071889	21.2354	1.61147	1.15899	1.3904	0.164407	0.647265	FAM3A	chrX	0.067195	0.05807	0.020036	0.270782	0.101258	0.184561
ENSG00000071894	166.65	0.388449	0.73455	0.528826	0.596926	0.930614	CPSF1	chr8	0.526563	0.270916	0.930025	0.84706	1.30433	0.422254
ENSG00000071909	1284.36	-0.23646	0.356377	-0.663512	0.507003	0.899536	MYO3B	chr2	0.72424	0.838652	1.16769	0.751417	0.924044	0.582037
ENSG00000071967	0.538037	-1.04673	4.01729	-0.260557	0.794435	NA	CYBRD1	chr2	0	0.00359	0	0	0.001866	0
ENSG00000071991	10.5973	6.944	3.74365	1.85488	0.0636141	0.449497	CDH19	chr18	0	0	0	0.148833	0	0
ENSG00000071994	2513.16	-0.106873	0.424913	-0.251516	0.801415	0.972085	PDCD2	chr6	9.92592	20.7718	55.4442	40.8379	18.0356	13.4227
ENSG00000072041	0.178064	1.08307	4.08047	0.265428	0.79068	NA	SLC6A15	chr12	0	0	0	0	0	0.003969
ENSG00000072042	225.447	1.32974	0.452335	2.93972	0.0032851	0.117121	RDH11	chr14	0.379443	0.356955	1.2654	1.41086	1.23775	1.02528
ENSG00000072062	3098.59	0.0769894	0.436311	0.176455	0.859936	0.97971	PRKACA	chr19	33.9878	5.18566	3.26567	3.68821	7.34712	7.08484
ENSG00000072071	484.18	0.838135	0.504404	1.66163	0.0965861	0.525825	ADGRL1	chr19	0.575129	0.878634	1.0823	0.923795	1.75264	2.30141
ENSG00000072080	0	NA	NA	NA	NA	NA	SPP2	chr2	0	0	0	0	0	0
ENSG00000072110	14224	-0.44265	0.486356	-0.910136	0.362751	0.829633	ACTN1	chr14	116.233	43.2061	35.5263	88.1602	51.3886	48.1216
ENSG00000072121	79.0721	0.64987	0.84085	0.772873	0.439598	0.874905	ZFYVE26	chr14	0.141384	0.354549	0.094063	0.12555	0.033682	0.165346
ENSG00000072133	1197.81	-0.808972	0.473553	-1.7083	0.08758	0.508555	RPS6KA6	chrX	1.76176	3.89251	4.42502	1.87182	3.20308	1.40579
ENSG00000072134	953.832	-0.71278	0.313069	-2.27675	0.0228013	0.289313	EPN2	chr17	4.63436	6.12166	18.6878	4.39556	5.55503	4.79758
ENSG00000072135	92.9561	1.29161	1.16551	1.10819	0.26778	0.757662	PTPN18	chr2	0.140468	0.008552	0.392097	0.604526	0.170985	0.668542
ENSG00000072163	412.943	0.699817	0.454262	1.54056	0.123424	0.580685	LIMS2	chr2	2.40232	4.2286	2.96752	9.41414	5.21369	2.80276
ENSG00000072182	3.18187	-5.09147	3.92002	-1.29884	0.194	NA	ASIC4	chr2	0	0.018449	0.00118	0	0	0
ENSG00000072195	0.666431	1.61159	3.99406	0.403496	0.686583	NA	SPEG	chr2	0	0	0.001115	0	0.002316	0
ENSG00000072201	438.899	-0.869727	0.391749	-2.22011	0.0264113	0.309981	LNX1	chr4	0.630829	0.391129	2.78775	0.676176	0.196579	0.982916
ENSG00000072210	2300.59	0.0344245	0.374504	0.0919202	0.926761	0.988878	ALDH3A2	chr17	9.7226	6.9865	7.2612	11.3562	6.41995	7.91049
ENSG00000072274	562.363	-0.654863	0.57297	-1.14293	0.253069	0.749347	TFRC	chr3	1.28004	2.56529	2.21877	1.91254	0.468373	1.5429
ENSG00000072310	42.1414	1.13349	1.18913	0.953204	0.340486	0.813199	SREBF1	chr17	0.042336	0.002555	0.416717	0.150855	0.299789	0.124587
ENSG00000072315	0	NA	NA	NA	NA	NA	TRPC5	chrX	0	0	0	0	0	0
ENSG00000072364	3836.4	-0.00629548	0.395862	-0.0159032	0.987312	0.998473	AFF4	chr5	7.81749	7.53442	9.0457	14.772	10.9914	4.08529
ENSG00000072401	1414.88	-0.0948315	0.512735	-0.184952	0.853267	0.978386	UBE2D1	chr10	9.00388	6.0385	15.8615	18.2839	30.5107	11.6261
ENSG00000072415	1293.93	0.156863	0.361921	0.433418	0.664711	0.945891	MPP5	chr14	1.37532	2.41989	4.41019	1.32723	2.748	2.33677
ENSG00000072422	72.393	-0.0788843	1.68203	-0.0468983	0.962594	0.995598	RHOBTB1	chr10	0.023016	0	0.711141	0.258918	0.527649	0.008076
ENSG00000072501	1599.64	-0.342356	0.324504	-1.05501	0.291419	0.775264	SMC1A	chrX	3.49608	3.57728	2.62261	2.55422	2.84638	3.16234
ENSG00000072506	591.338	0.413392	0.55064	0.750748	0.452804	0.882013	HSD17B10	chrX	14.3916	6.03325	7.11594	17.5323	6.70646	16.2632
ENSG00000072518	782.748	-0.152045	0.469823	-0.323623	0.746224	0.959031	MARK2	chr11	0.231379	0.335308	0.436936	0.227268	0.445897	0.394842
ENSG00000072571	10519.3	-0.473334	0.390947	-1.21074	0.225996	0.724012	HMMR	chr5	84.4825	71.0239	55.9099	43.8445	60.3563	66.9143
ENSG00000072609	1547.51	0.400885	0.355337	1.12818	0.259242	0.753092	CHFR	chr12	1.93802	1.25864	3.93356	4.94064	8.6972	10.139
ENSG00000072657	771.879	-0.315896	0.4286	-0.737041	0.461097	0.885637	TRHDE	chr12	0.251991	0.756525	0.245999	0.868219	0.485605	0.130048
ENSG00000072682	96.9115	2.10028	1.56769	1.33973	0.180334	0.673911	P4HA2	chr5	0.001172	1.36222	0.098705	0.930967	0	1.40789
ENSG00000072694	0	NA	NA	NA	NA	NA	FCGR2B	chr1	0	0	0	0	0	0
ENSG00000072736	1468.36	-0.453873	0.403365	-1.12522	0.260497	0.753092	NFATC3	chr16	1.97131	1.63642	19.427	1.73793	2.58362	1.86856
ENSG00000072756	2402.55	-0.771061	0.337187	-2.28675	0.0222106	0.285531	TRNT1	chr3	15.4755	18.8921	19.19	17.4511	9.18984	4.61813
ENSG00000072778	387.453	0.762402	0.386318	1.97351	0.0484377	0.400603	ACADVL	chr17	1.47813	1.39368	1.51442	2.55986	1.95907	2.43845
ENSG00000072786	237.234	0.888034	0.704028	1.26136	0.207178	0.703923	STK10	chr5	0.463487	0.422208	0.179187	1.00852	0.579016	0.132375
ENSG00000072803	820.312	0.288316	0.396228	0.727653	0.466826	0.889307	FBXW11	chr5	0.2709	0.271903	0.278446	0.270327	0.554138	0.282216
ENSG00000072818	0.153734	-0.840481	4.08047	-0.205976	0.836809	NA	ACAP1	chr17	0	0	0.006959	0	0	0
ENSG00000072832	3609.51	1.32102	0.348445	3.79118	0.000149936	0.0181369	CRMP1	chr4	4.44788	12.9513	5.13761	33.7775	31.8962	32.0536
ENSG00000072840	107.456	-0.229428	0.754371	-0.304132	0.761027	0.962668	EVC	chr4	0.426218	0.712683	0.197532	0.178706	0.632107	1.50364
ENSG00000072849	268.065	-0.358364	0.911756	-0.393048	0.694284	0.949727	DERL2	chr17	0.16536	1.83191	0.466914	1.26634	0.282825	0.443257
ENSG00000072858	0	NA	NA	NA	NA	NA	SIDT1	chr3	0	0	0	0	0	0
ENSG00000072864	3562.17	-0.20969	0.535308	-0.391719	0.695266	0.95047	NDE1	chr16	14.1601	9.74042	4.14221	10.4939	9.92483	10.1199
ENSG00000072952	1499.42	0.325543	0.356086	0.914225	0.360598	0.827283	MRVI1	chr11	0.684016	0.506242	0.607002	0.582791	0.948238	2.74819
ENSG00000072954	32.0278	-1.23821	2.1942	-0.564308	0.572545	0.923625	TMEM38A	chr19	0.014208	0	0.837475	0.136233	0.276694	0
ENSG00000072958	1048.05	0.449188	0.427243	1.05136	0.293091	0.775264	AP1M1	chr19	4.52511	8.63238	1.58361	6.61181	29.0224	9.53752
ENSG00000073008	376.896	0.473829	0.687194	0.689512	0.490501	0.894397	PVR	chr19	2.19269	0.573439	2.44731	2.95865	4.13703	0.903116
ENSG00000073050	1544.99	-0.416809	0.454102	-0.917876	0.358684	0.825388	XRCC1	chr19	25.6325	11.3182	10.4961	13.0259	12.4279	12.3581
ENSG00000073060	1449	3.44635	0.891866	3.8642	0.000111452	0.0154328	SCARB1	chr12	0.677859	0.514065	3.33704	12.0272	0.397471	11.7337
ENSG00000073067	0	NA	NA	NA	NA	NA	CYP2W1	chr7	0	0	0	0	0	0
ENSG00000073111	6577.45	-0.13208	0.424377	-0.311233	0.755623	0.962043	MCM2	chr3	35.4066	13.3327	33.4387	32.193	22.9665	21.8597
ENSG00000073146	12.5632	4.31332	2.52985	1.70497	NA	NA	MOV10L1	chr22	0.004686	0.006159	0.003529	0	0.163671	0
ENSG00000073150	0.502697	1.05226	4.03474	0.2608	0.794247	NA	PANX2	chr22	0	0	0.008461	0	0.014088	0.010256
ENSG00000073169	13.7272	-0.792717	2.25857	-0.350982	0.725602	0.955532	SELENOO	chr22	0	0.336989	0.104385	0.241102	0.046079	0
ENSG00000073282	2209.4	-0.52562	0.322423	-1.63022	0.103056	0.540355	TP63	chr3	1.9777	1.53533	1.69639	1.66197	1.50178	0.963964
ENSG00000073331	47.9652	5.72698	2.05205	2.79086	0.0052568	0.148421	ALPK1	chr4	7e-06	0.000516	0.000442	0.023663	0	0.075091
ENSG00000073350	3251.86	0.417601	0.408154	1.02314	0.306239	0.787491	LLGL2	chr17	3.65365	2.00338	4.25922	2.92105	6.57308	3.89249
ENSG00000073417	1495.38	-0.26433	0.442168	-0.597804	0.549971	0.916268	PDE8A	chr15	3.15037	3.73812	4.11062	2.51069	5.73915	2.57723
ENSG00000073464	890.37	0.0655481	0.396923	0.16514	0.868833	0.979848	CLCN4	chrX	3.25745	2.04793	1.73567	2.49016	3.19753	2.70661
ENSG00000073536	12.6887	-0.111178	2.0295	-0.0547809	0.956313	0.994154	NLE1	chr17	0.007815	0.081997	0.062205	0.040881	0.200436	0
ENSG00000073578	1048.6	0.148675	0.578838	0.256851	0.797294	0.971524	SDHA	chr5	13.954	4.65555	2.92573	6.92985	10.8962	1.61075
ENSG00000073584	974.156	-0.566628	0.466469	-1.21472	0.224474	0.723149	SMARCE1	chr17	8.76388	4.58989	4.93131	5.88614	2.1281	5.77755
ENSG00000073598	2.09173	0.695059	3.81653	0.182118	0.85549	NA	FNDC8	chr17	0.246904	0	0	0.491994	0	0
ENSG00000073605	13.2853	6.29095	2.57857	2.4397	0.0146994	0.238122	GSDMB	chr17	0	0	0.005753	0	0.253096	0.18734
ENSG00000073614	7075.01	0.484814	0.452624	1.07112	0.284116	0.770402	KDM5A	chr12	8.03964	6.25428	14.0127	10.9632	21.938	11.7425
ENSG00000073670	14.647	1.11758	2.37574	0.470413	0.63806	0.93809	ADAM11	chr17	0.087918	0	0	0.074034	0.003739	0.153502
ENSG00000073711	374.717	-0.698417	0.695945	-1.00355	0.315595	0.795431	PPP2R3A	chr3	0.736197	0.795095	1.21018	1.14071	0.23332	0.19491
ENSG00000073712	5143.65	-0.516651	0.281727	-1.83387	0.0666738	0.457241	FERMT2	chr14	24.4552	24.195	24.2921	18.0906	18.0166	11.2348
ENSG00000073734	18.8598	-0.180718	2.12973	-0.0848547	0.932377	0.989816	ABCB11	chr2	0.130041	0.109059	0.09242	0.248439	0.015974	0.047334
ENSG00000073737	9.30416	-1.7831	3.05768	-0.583156	0.559788	0.919247	DHRS9	chr2	0.146529	0	0.009405	0.055256	0	0
ENSG00000073754	0	NA	NA	NA	NA	NA	CD5L	chr1	0	0	0	0	0	0
ENSG00000073756	38.0841	7.82178	2.17307	3.59942	0.000318931	0.0293584	PTGS2	chr1	0	0	0.004399	0.717665	0	0.254904
ENSG00000073792	988.696	-0.135178	0.4389	-0.307992	0.758089	0.962068	IGF2BP2	chr3	4.29431	5.06109	1.50443	2.15324	2.04436	1.7681
ENSG00000073803	150.386	0.0240607	0.55747	0.0431605	0.965574	0.996177	MAP3K13	chr3	0.611609	1.64111	0.855524	0.057126	0.786831	0.036327
ENSG00000073849	47.9149	-0.0142236	1.09868	-0.0129461	0.989671	0.998955	ST6GAL1	chr3	0.011514	0.014683	0.040058	0.002586	0.043113	0.026557
ENSG00000073861	0.201802	-0.840481	4.08047	-0.205976	0.836809	NA	TBX21	chr17	0.016333	0	0	0	0	0
ENSG00000073905	3.17589	-0.235216	3.78269	-0.0621822	0.950418	NA	VDAC1P1	chrX	0.025258	0.229604	0	0.213569	0	0.048621
ENSG00000073910	12.9409	-0.110726	2.75146	-0.0402427	0.9679	0.996639	FRY	chr13	0	0.011894	0.040543	0.024831	0.000981	0.008433
ENSG00000073921	4755.88	0.170683	0.420197	0.406197	0.684598	0.947786	PICALM	chr11	11.5723	23.6866	18.186	13.0846	15.8566	22.5856
ENSG00000073969	683.125	0.123272	0.474337	0.259883	0.794954	0.971524	NSF	chr17	1.6253	6.19298	5.17225	1.57926	0.599237	0.925125
ENSG00000074047	0.12238	-0.840481	4.08047	-0.205976	0.836809	NA	GLI2	chr2	0	0.000335	0	0	0	0
ENSG00000074054	451.2	-0.538623	0.512939	-1.05007	0.293685	0.775818	CLASP1	chr2	0.932124	0.476066	0.575374	1.28147	0.519197	0.161618
ENSG00000074071	164.116	0.394636	0.526832	0.749073	0.453813	0.882138	MRPS34	chr16	3.54378	1.80858	3.35569	2.93951	5.16146	3.38033
ENSG00000074181	0.576557	-1.15099	4.00971	-0.287051	0.774074	NA	NOTCH3	chr19	0	0.005854	0.003616	0	0	0.00445
ENSG00000074201	819.589	0.564598	0.443661	1.27259	0.203164	0.698291	CLNS1A	chr11	2.34825	4.91493	2.5091	7.26969	4.05128	5.67073
ENSG00000074211	159.836	-0.298497	0.560086	-0.532948	0.59407	0.929635	PPP2R2C	chr4	0.023868	0.020419	0.031689	0.021642	0.041941	0.014735
ENSG00000074219	34.1329	1.66378	1.74957	0.950969	0.34162	0.813689	TEAD2	chr19	0.262777	0.091949	0	0.918302	0.027138	0.301565
ENSG00000074266	0.648815	-1.38426	3.99456	-0.346535	0.72894	NA	EED	chr11	0.004697	0.000699	0.009204	0	0.004291	0
ENSG00000074276	0.170899	1.08307	4.08047	0.265428	0.79068	NA	CDHR2	chr5	0	0	0	0	0.000391	0
ENSG00000074317	1693.55	-0.138792	0.444378	-0.31233	0.75479	0.962043	SNCB	chr5	13.173	21.9066	28.3793	9.01544	27.5746	21.1083
ENSG00000074319	24181.4	0.291154	0.2857	1.01909	0.30816	0.788947	TSG101	chr11	90.9152	133.326	175.59	310.257	173.793	172.814
ENSG00000074356	4176.19	-0.298573	0.295424	-1.01066	0.312181	0.791347	NCBP3	chr17	5.52473	9.15436	5.73706	5.59529	6.75978	4.39061
ENSG00000074370	142.596	-0.718627	0.764378	-0.940147	0.347142	0.817035	ATP2A3	chr17	0.482446	0.590359	0.317132	0.203469	1.01784	0.111684
ENSG00000074410	1752.31	-0.281886	0.407741	-0.691337	0.489354	0.894397	CA12	chr15	5.30903	4.47512	1.56442	2.75121	1.73142	2.32059
ENSG00000074416	0.68017	-1.47073	3.98953	-0.368647	0.712391	NA	MGLL	chr3	0.000235	0	0.001968	0	0.000686	0
ENSG00000074527	483.148	-0.283739	0.489682	-0.579436	0.562295	0.919815	NTN4	chr12	1.83369	1.58386	0.716295	1.41282	0.908285	1.91663
ENSG00000074582	62.0805	1.47076	0.734208	2.00319	0.0451566	0.389531	BCS1L	chr2	0.389037	0.485478	0.643872	0.851227	2.00598	1.56959
ENSG00000074590	94.637	3.46425	0.967056	3.58226	0.000340632	0.0300444	NUAK1	chr12	0.005562	0.08008	0.048605	0.364645	0.845888	0.33057
ENSG00000074603	3240.08	-0.310785	0.440711	-0.705189	0.480693	0.892552	DPP8	chr15	14.0827	4.27524	19.9905	6.57259	8.21814	4.0685
ENSG00000074621	128.115	0.304737	0.702374	0.433867	0.664385	0.945891	SLC24A1	chr15	0.441337	0.09917	0.181079	0.076579	0.258761	0.295951
ENSG00000074657	6062.29	-0.56859	0.331184	-1.71684	0.0860081	0.505645	ZNF532	chr18	2.60037	2.67462	2.59063	2.79939	1.5804	2.38287
ENSG00000074660	0	NA	NA	NA	NA	NA	SCARF1	chr17	0	0.112642	0.003424	0	0	0
ENSG00000074695	7304.66	0.00212624	0.280699	0.0075748	0.993956	0.999408	LMAN1	chr18	25.6195	25.3092	19.3539	27.3131	24.7976	24.5814
ENSG00000074696	267.669	1.46679	0.491503	2.9843	0.00284231	0.109326	HACD3	chr15	0.277154	0.207816	0.207321	0.712528	0.796283	0.486466
ENSG00000074706	308.038	0.405981	0.692721	0.586067	0.557831	0.919068	IPCEF1	chr6	2.51203	0.227439	3.11714	1.24585	0.731491	1.47421
ENSG00000074755	163.639	0.0661631	0.661434	0.10003	0.920321	0.987912	ZZEF1	chr17	0.191319	0.096451	0.274919	0.468194	0.160521	0.222637
ENSG00000074771	0	NA	NA	NA	NA	NA	NOX3	chr6	0	0	0	0	0	0
ENSG00000074800	487.429	0.269309	0.638508	0.421779	0.673186	0.945891	ENO1	chr1	0.87554	5.77329	5.88959	6.25678	2.65632	3.91976
ENSG00000074803	0	NA	NA	NA	NA	NA	SLC12A1	chr15	0	0	0	0	0.04522	0
ENSG00000074842	4156.9	0.610354	0.289782	2.10625	0.0351825	0.353229	MYDGF	chr19	19.3507	60.4606	54.3594	29.9691	94.9931	113.199
ENSG00000074855	53.2974	1.29455	0.75308	1.719	0.0856135	0.505304	ANO8	chr19	0.11605	0.165058	0.137332	0.470133	0.255702	0.203185
ENSG00000074935	3085.45	-0.877798	0.464327	-1.89047	0.0586945	0.43436	TUBE1	chr6	39.4772	16.2213	22.9792	22.8551	6.2559	4.64302
ENSG00000074964	4.70171	5.77219	3.30746	1.7452	0.0809499	NA	ARHGEF10L	chr1	0	0	0	0.059663	0.001123	0.023748
ENSG00000074966	0.153734	-0.840481	4.08047	-0.205976	0.836809	NA	TXK	chr4	0	0	0.001538	0	0	0
ENSG00000075035	24.9126	0.589021	2.07281	0.284166	0.776284	0.967459	WSCD2	chr12	0.008205	0	0.042997	0.038563	0.003625	0
ENSG00000075043	7.6121	4.40098	2.60633	1.68858	0.0913007	NA	KCNQ2	chr20	0.001711	0	0.001783	0.000667	0.293342	0.009606
ENSG00000075073	0.153734	-0.840481	4.08047	-0.205976	0.836809	NA	TACR2	chr10	0	0	0.011872	0	0	0
ENSG00000075089	380.429	-0.984333	0.482745	-2.03903	0.041447	0.374195	ACTR6	chr12	4.12153	3.77839	2.51986	0.781956	0.31136	0.455179
ENSG00000075131	988.653	0.215153	0.400108	0.537737	0.590758	0.927827	TIPIN	chr15	1.43325	3.56948	7.54323	2.91662	1.70061	2.62249
ENSG00000075142	3045.47	-0.0582388	0.387343	-0.150355	0.880485	0.981183	SRI	chr7	21.4108	16.3277	30.2141	17.7913	30.5972	38.9268
ENSG00000075151	1104.91	0.445105	0.463441	0.960435	0.336836	0.809637	EIF4G3	chr1	0.213632	0.614656	0.455258	0.46766	0.860038	0.639415
ENSG00000075188	22216.5	-0.730245	0.316706	-2.30575	0.0211246	0.27916	NUP37	chr12	206.57	343.41	297.83	192.477	282.263	148.352
ENSG00000075213	1824.76	0.656767	0.348455	1.8848	0.0594571	0.436512	SEMA3A	chr7	2.03388	3.20347	2.50743	6.18991	2.7095	5.46697
ENSG00000075218	7237.36	0.842011	0.328072	2.56654	0.0102718	0.202435	GTSE1	chr22	38.6286	23.2113	29.7064	63.2812	68.8381	54.7206
ENSG00000075223	103.928	-0.668577	0.587518	-1.13797	0.255134	0.75094	SEMA3C	chr7	0.025562	0.039554	0.061327	0.031902	0.115326	0.031401
ENSG00000075234	197.264	1.41941	0.686781	2.06676	0.0387572	0.367337	TTC38	chr22	0.996994	0.410455	0.212759	2.13321	1.35157	1.59139
ENSG00000075239	2851.78	0.735315	0.409518	1.79556	0.0725641	0.475064	ACAT1	chr11	8.05763	17.6936	7.82352	25.8289	20.5558	18.6557
ENSG00000075240	59.8666	1.59466	0.939142	1.69799	0.0895091	0.512482	GRAMD4	chr22	0.015747	0.01449	0.003401	0.0387	0.016471	0.047634
ENSG00000075275	3109.69	0.219227	0.305083	0.71858	0.4724	0.890679	CELSR1	chr22	2.81091	3.57678	4.19133	3.96217	3.91239	16.1941
ENSG00000075290	54.4641	0.101707	1.59789	0.0636509	0.949248	0.991878	WNT8B	chr10	0	0.605786	0.639041	1.0716	0	0.35471
ENSG00000075292	5612.51	-0.786101	0.316511	-2.48365	0.0130045	0.225828	ZNF638	chr2	11.9999	14.3679	18.5928	2.36387	3.26344	3.4159
ENSG00000075303	292.105	-0.514376	0.522933	-0.983636	0.325295	0.802375	SLC25A40	chr7	2.11112	1.02694	1.57557	1.59342	1.0383	0.686921
ENSG00000075336	4379.03	-0.085366	0.318871	-0.267713	0.78892	0.969891	TIMM21	chr18	22.6375	33.8089	20.9133	29.6509	22.3321	26.7898
ENSG00000075340	9752.04	0.451296	0.399188	1.13054	0.25825	0.752313	ADD2	chr2	2.81727	0.240064	0.22662	0.213486	0.207348	0.158744
ENSG00000075388	0.489518	-2.4152	3.99051	-0.605236	0.545022	NA	FGF4	chr11	0	0.034596	0	0	0	0
ENSG00000075391	715.154	0.062044	0.491329	0.126278	0.899512	0.98462	RASAL2	chr1	0.063972	0.179145	0.111384	0.155444	0.231115	0.052374
ENSG00000075399	10.5781	0.983989	1.64315	0.598845	0.549276	0.91612	VPS9D1	chr16	0.067937	0.105162	0.074146	0.028515	0.102964	0.277815
ENSG00000075407	93.6288	0.920245	0.910915	1.01024	0.312379	0.791347	ZNF37A	chr10	0.195417	0.069752	0.066048	0.175016	0.211407	0.202828
ENSG00000075413	3557.61	-0.132209	0.448541	-0.294754	0.768182	0.964178	MARK3	chr14	1.43952	1.95256	0.931118	10.1735	1.11305	6.76506
ENSG00000075415	1795.18	1.05081	0.307921	3.4126	0.000643452	0.0442648	SLC25A3	chr12	7.51032	9.93659	10.0311	6.54753	26.9367	12.6718
ENSG00000075420	7941.09	-0.641181	0.357252	-1.79475	0.0726928	0.475064	FNDC3B	chr3	0.985067	30.7678	22.5036	1.18035	1.23771	0.832501
ENSG00000075426	867.824	1.0267	0.580875	1.76751	0.0771434	0.484779	FOSL2	chr2	0.265091	1.33389	1.07604	5.6853	1.28161	0.796636
ENSG00000075429	23.3521	-0.770985	2.03024	-0.37975	0.704131	0.952867	CACNG5	chr17	1.01804	0.266644	0	0.515085	0.417947	0
ENSG00000075461	7.37178	-1.74583	2.60715	-0.669632	0.503093	NA	CACNG4	chr17	0.025263	0	0.235469	0.019569	0	0.03782
ENSG00000075539	1099.57	-0.455125	0.382237	-1.19069	0.233776	0.730598	FRYL	chr4	0.823903	0.537972	0.95323	0.668077	0.574536	0.6589
ENSG00000075568	4612.42	0.259428	0.382075	0.678997	0.49714	0.896302	TMEM131	chr2	3.8866	8.36358	8.25185	9.62814	8.04155	11.0491
ENSG00000075618	167.122	-0.785536	1.11069	-0.707253	0.47941	0.892504	FSCN1	chr7	0.02108	3.55007	0.115556	0.138463	0.663183	0.382215
ENSG00000075624	21775.3	0.275507	0.363953	0.756984	0.449059	0.880404	ACTB	chr7	160.888	164.917	94.9187	175.502	186.226	250.623
ENSG00000075643	618.424	-0.106588	0.576756	-0.184806	0.853381	0.978386	MOCOS	chr18	3.16142	1.90471	0.790141	2.44104	2.82615	1.73863
ENSG00000075651	827.078	-0.85632	0.918052	-0.932758	0.350945	0.820143	PLD1	chr3	9.24519	3.4702	2.17077	0.741791	0.423458	0.035079
ENSG00000075673	0	NA	NA	NA	NA	NA	ATP12A	chr13	0	0	0	0	0	0
ENSG00000075702	710.669	0.305174	0.349183	0.873967	0.382136	0.841061	WDR62	chr19	0.867671	0.690843	0.659041	0.891119	1.16864	1.07046
ENSG00000075711	5797.9	-0.312319	0.292312	-1.06844	0.28532	0.771341	DLG1	chr3	20.9504	79.0459	22.0041	22.2674	41.1601	25.3077
ENSG00000075785	7606.03	0.112148	0.404607	0.277179	0.781643	0.968388	RAB7A	chr3	49.1302	93.2616	37.7568	75.182	58.5048	84.529
ENSG00000075790	721.669	-0.148998	0.410398	-0.363057	0.716563	0.953669	BCAP29	chr7	2.99794	5.1472	2.76227	2.13987	2.46892	3.01289
ENSG00000075826	199.963	1.05292	0.577367	1.82365	0.068205	0.46158	SEC31B	chr10	0.286018	0.491448	0.261016	0.373313	0.712837	0.993407
ENSG00000075856	1455.2	0.197289	0.414103	0.476424	0.633772	0.937305	SART3	chr12	5.17189	1.79264	1.64251	2.84724	3.16	2.75411
ENSG00000075884	1429.98	-0.335753	0.467804	-0.717721	0.47293	0.890679	ARHGAP15	chr2	2.10063	4.60569	0.725314	3.93891	2.50955	0.833191
ENSG00000075886	272.438	0.072914	0.61388	0.118776	0.905453	0.986348	TUBA3D	chr2	3.6212	1.09937	3.10162	2.64879	3.58421	2.16899
ENSG00000075891	0	NA	NA	NA	NA	NA	PAX2	chr10	0	0	0	0	0	0
ENSG00000075914	10280.9	-0.272192	0.370413	-0.734833	0.462441	0.886577	EXOSC7	chr3	178.987	128.711	310.358	148.668	217.139	158.915
ENSG00000075945	448.627	-0.499461	0.544274	-0.917666	0.358794	0.825521	KIFAP3	chr1	2.67983	0.866967	2.01485	1.10233	1.85446	1.55817
ENSG00000075975	6680.62	-1.05513	0.425878	-2.47755	0.0132289	0.226484	MKRN2	chr3	86.7892	41.6414	54.7734	44.8148	20.814	34.2532
ENSG00000076003	3450.77	0.593106	0.572252	1.03644	0.299996	0.780951	MCM6	chr2	14.5633	13.042	10.1456	41.513	7.58584	14.6356
ENSG00000076043	20444.4	-0.440448	0.272144	-1.61844	0.105569	0.547225	REXO2	chr11	177.177	208.281	132.873	95.4901	116.431	92.3097
ENSG00000076053	27.3065	1.71344	1.44364	1.18689	0.235269	0.731571	RBM7	chr11	0.050145	0.260038	0.044953	0.174617	0.089749	0.184554
ENSG00000076067	137.056	0.504615	0.744862	0.677461	0.498114	0.896302	RBMS2	chr12	0.175943	0.455657	0.118437	0.249345	0.416589	0.291181
ENSG00000076108	14320.2	-0.00173921	0.34555	-0.00503315	0.995984	0.999543	BAZ2A	chr12	26.5042	15.8464	21.5168	25.2226	21.5112	22.6682
ENSG00000076201	269.479	0.201082	0.418002	0.481054	0.630478	0.937305	PTPN23	chr3	0.798465	0.88672	0.634934	1.162	1.40298	0.865462
ENSG00000076242	101.907	1.43991	0.988537	1.45661	0.145223	0.616137	MLH1	chr3	0.060709	0.21693	0.658878	0.788682	0.218302	1.38894
ENSG00000076248	22440.6	-0.285503	0.504603	-0.565797	0.571532	0.923625	UNG	chr12	375.174	93.2741	158.69	195.798	222.717	181.795
ENSG00000076258	0.170899	1.08307	4.08047	0.265428	0.79068	NA	FMO4	chr1	0	0	0	0	0.017362	0
ENSG00000076321	4231.51	0.049032	0.418225	0.117238	0.906671	0.986511	KLHL20	chr1	14.7095	12.0766	36.3656	15.0679	25.2095	22.9158
ENSG00000076344	6.32496	-0.0863431	2.7785	-0.0310755	0.975209	NA	RGS11	chr16	0	0.08732	0.070945	0.077384	0	0.00892
ENSG00000076351	0.614937	-2.71855	3.97481	-0.683945	0.49401	NA	SLC46A1	chr17	0.005352	0	0.092032	0.062026	0	0
ENSG00000076356	43.115	-0.706687	1.26674	-0.557876	0.576929	0.92468	PLXNA2	chr1	0.248497	0.009488	0.202286	0.079085	0.004024	0.042458
ENSG00000076382	473.882	-1.08578	0.559108	-1.94198	0.052139	0.411224	SPAG5	chr17	3.0146	2.4397	2.83796	1.80376	1.67139	0.419592
ENSG00000076513	1842.93	-0.154489	0.426161	-0.362513	0.716969	0.953669	ANKRD13A	chr12	4.96427	14.2434	8.51048	5.13779	15.2762	10.1504
ENSG00000076554	9212.65	-0.666036	0.336805	-1.97751	0.0479838	0.397759	TPD52	chr8	104.761	142.861	111.434	58.242	78.0761	83.7524
ENSG00000076555	31.7742	-0.146105	1.40692	-0.103847	0.917291	0.987912	ACACB	chr12	0.002889	0.104316	0.020214	0.060125	0.103237	0.000232
ENSG00000076604	68.759	0.473726	0.831174	0.569949	0.568713	0.922559	TRAF4	chr17	0.251472	0.804716	0.447947	0.601013	0.656577	0.186002
ENSG00000076641	6470.2	-0.302654	0.374046	-0.809133	0.418438	0.863334	PAG1	chr8	8.57545	10.4585	16.995	10.8161	13.6853	8.16819
ENSG00000076650	2009.69	-1.43193	0.496785	-2.88239	0.0039467	0.127738	GPATCH1	chr19	18.0177	10.9076	8.89694	5.05486	2.66528	8.60145
ENSG00000076662	0.170899	1.08307	4.08047	0.265428	0.79068	NA	ICAM3	chr19	0.343477	0.251643	0.067592	0.265613	0.123413	0.580053
ENSG00000076685	202.491	-0.989196	0.605271	-1.6343	0.102196	0.538327	NT5C2	chr10	0.656226	0.931888	2.14999	0.58907	1.21408	0.445286
ENSG00000076706	1817.54	0.515019	0.542076	0.950085	0.342069	0.813689	MCAM	chr11	5.41062	3.05	2.55243	5.16813	2.71393	9.94031
ENSG00000076716	54.6692	1.32397	0.774206	1.7101	0.0872476	0.508006	GPC4	chrX	0.053029	0.130058	0.13673	0.456127	0.236556	0.259074
ENSG00000076770	1.24704	-2.56282	3.94587	-0.649494	0.516019	NA	MBNL3	chrX	0	0	0.012667	0	0.002339	0
ENSG00000076826	28.66	1.62791	1.35731	1.19937	0.230384	0.727024	CAMSAP3	chr19	0.008812	0.046247	0.267216	0.261519	0.270044	0.04417
ENSG00000076864	168.213	1.29735	0.603752	2.14881	0.0316493	0.335541	RAP1GAP	chr1	0.04843	0.095634	0.077185	0.152706	0.33192	0.125305
ENSG00000076924	109.247	0.81357	0.615568	1.32166	0.186282	0.681671	XAB2	chr19	0.4241	0.27409	0.315276	0.775149	0.703244	0.402419
ENSG00000076928	38.0942	0.858978	1.52954	0.561593	0.574393	0.924341	ARHGEF1	chr19	0.010758	0.126745	0.127213	0.013413	0.043727	0.293357
ENSG00000076944	255.357	1.87972	0.510687	3.68077	0.000232533	0.0245222	STXBP2	chr19	1.9382	1.4488	0.645851	2.89683	3.2562	4.00201
ENSG00000076984	380.458	0.249551	0.480178	0.519706	0.603269	0.931304	MAP2K7	chr19	3.05843	1.20598	0.876614	2.10257	2.27739	2.29735
ENSG00000077009	18.065	1.37067	1.13633	1.20623	0.227731	0.72499	NMRK2	chr19	0.122644	0.138023	0.224246	0.329746	0.466256	0.582674
ENSG00000077044	572.2	0.134008	0.39858	0.336214	0.736709	0.957669	DGKD	chr2	0.390756	0.243203	0.590423	0.614554	0.464939	0.34538
ENSG00000077063	988.342	-0.651163	0.445017	-1.46323	0.143404	0.612279	CTTNBP2	chr7	3.42164	3.73899	1.52349	2.17873	2.18474	1.83609
ENSG00000077080	0	NA	NA	NA	NA	NA	ACTL6B	chr7	0	0	0	0	0	0
ENSG00000077092	1360.28	0.218653	0.437625	0.499635	0.617332	0.934626	RARB	chr3	0.504054	0.977022	0.403437	0.629793	0.938239	0.809663
ENSG00000077097	5622.64	-1.02289	0.335563	-3.04828	0.00230157	0.097474	TOP2B	chr3	28.0975	24.7578	18.2699	15.0203	10.8634	13.7811
ENSG00000077147	2700.92	-0.376196	0.407757	-0.922598	0.356217	0.824539	TM9SF3	chr10	6.27755	6.46091	12.3486	4.86777	9.34881	6.7359
ENSG00000077150	118.956	-0.135506	0.674555	-0.200882	0.840791	0.976715	NFKB2	chr10	0.640359	0.292901	0.529738	0.785526	0.537906	0.262363
ENSG00000077152	3758.55	-0.114246	0.496531	-0.230088	0.818023	0.973558	UBE2T	chr1	55.7077	39.1131	129.271	64.3272	105.069	77.8335
ENSG00000077157	1336.37	-0.116965	0.36764	-0.318152	0.75037	0.9608	PPP1R12B	chr1	1.50966	1.00439	1.23906	1.21697	0.92638	2.07357
ENSG00000077232	740.026	-0.664702	0.432657	-1.53633	0.124458	0.582086	DNAJC10	chr2	0.564241	3.63906	0.645015	0.67642	0.419139	0.549886
ENSG00000077235	943.031	-0.407522	0.410898	-0.991785	0.321302	0.799565	GTF3C1	chr16	2.05542	1.13809	1.76679	1.19285	1.85996	1.44659
ENSG00000077238	344.868	-0.372779	0.607555	-0.613572	0.539498	0.912591	IL4R	chr16	0.286247	0.129412	2.53256	0.251713	0.096098	0.27419
ENSG00000077254	2065.7	-0.601496	0.387648	-1.55166	0.120745	0.575497	USP33	chr1	8.10054	7.43003	5.48543	5.17096	4.69824	4.64993
ENSG00000077264	51.9177	-2.74603	1.26046	-2.17859	0.0293621	0.326375	PAK3	chrX	0.045203	0.048716	0.04811	0.016284	0	0.00557
ENSG00000077274	0.153734	-0.840481	4.08047	-0.205976	0.836809	NA	CAPN6	chrX	0	0	0.001974	0	0	0
ENSG00000077279	157.202	-0.257649	0.873085	-0.295102	0.767916	0.964036	DCX	chrX	0.114151	0.112691	0.709593	0.230929	0.490238	0.138827
ENSG00000077312	218.109	0.591286	0.468493	1.2621	0.206912	0.703701	SNRPA	chr19	1.98337	2.7716	1.32329	0.890809	0.806521	0.971677
ENSG00000077327	763.385	-0.422678	0.381787	-1.1071	0.26825	0.757904	SPAG6	chr10	2.97098	1.66582	5.3677	1.7342	2.15445	1.16798
ENSG00000077348	255.308	0.503379	0.529855	0.950032	0.342096	0.813689	EXOSC5	chr19	3.0173	3.7734	1.99405	3.96707	2.84999	5.83346
ENSG00000077380	6106.66	-0.215583	0.337636	-0.638506	0.523144	0.906921	DYNC1I2	chr2	35.3965	61.689	23.0144	39.6993	42.3649	38.064
ENSG00000077420	0	NA	NA	NA	NA	NA	APBB1IP	chr10	0	0	0	0	0	0
ENSG00000077454	65.0373	-0.094175	0.671209	-0.140306	0.888418	0.982718	LRCH4	chr7	1.02225	2.41977	1.32904	1.5557	3.14221	2.34692
ENSG00000077458	2912.15	-0.202588	0.456708	-0.443583	0.657344	0.944042	FAM76B	chr11	7.26957	11.1947	15.286	4.83584	12.4967	11.5544
ENSG00000077463	90.9472	1.67301	0.895364	1.86852	0.0616898	0.445138	SIRT6	chr19	0.295089	0.129859	0.165518	0.596849	1.30011	0.144034
ENSG00000077498	1.42451	4.04604	3.93844	1.02732	0.304269	NA	TYR	chr11	0	0	0	0	0	0.044361
ENSG00000077514	7731.4	-0.156334	0.284332	-0.54983	0.582436	0.925356	POLD3	chr11	39.4089	28.5685	30.9428	20.2407	17.9173	24.5681
ENSG00000077522	45.0641	1.25087	1.29369	0.966902	0.333593	0.807193	ACTN2	chr1	0.126778	0.172374	0.00489	0.329902	0.063324	0.450739
ENSG00000077549	1412.98	-0.0429046	0.386377	-0.111043	0.911582	0.987588	CAPZB	chr1	21.4037	8.96703	10.2285	4.75644	19.4688	11.8328
ENSG00000077585	1718.82	0.159213	0.44949	0.354208	0.723183	0.954968	GPR137B	chr1	9.23627	15.298	19.3835	10.4958	24.2997	19.2786
ENSG00000077616	1367.52	0.0739438	0.53427	0.138402	0.889923	0.982878	NAALAD2	chr11	3.79971	4.0584	1.3065	5.67853	1.88043	3.9389
ENSG00000077684	450.613	-0.301871	0.423162	-0.713371	0.475616	0.890994	JADE1	chr4	1.03365	0.635702	0.691306	0.744243	0.523921	0.890146
ENSG00000077713	4.90091	-4.69806	3.28646	-1.42952	0.152856	NA	SLC25A43	chrX	0.109879	0.071992	0	0.013155	0	0
ENSG00000077721	887.689	0.71581	0.506309	1.41378	0.157426	0.636742	UBE2A	chrX	2.50535	10.089	1.79699	9.49693	7.45107	10.3602
ENSG00000077782	2567.84	0.368718	0.376611	0.979043	0.327559	0.80328	FGFR1	chr8	4.24637	2.76224	4.02774	5.52356	5.07025	4.48132
ENSG00000077800	4647.83	0.520001	0.350031	1.48558	0.13739	0.602502	FKBP6	chr7	12.9098	10.6762	39.5427	75.1844	13.0408	74.0555
ENSG00000077935	1097.52	-0.468436	0.383205	-1.22242	0.221551	0.720357	SMC1B	chr22	4.36711	4.36241	7.62225	5.30513	3.7897	4.4124
ENSG00000077942	628.095	-0.348723	0.625178	-0.557799	0.576982	0.92468	FBLN1	chr22	6.91343	6.93656	0.20771	7.90583	0.262928	0.809205
ENSG00000077943	103.255	-0.0960925	0.748674	-0.12835	0.897872	0.983945	ITGA8	chr10	0.000684	0.030896	0.004249	0.022062	0.017373	0.010523
ENSG00000077984	0	NA	NA	NA	NA	NA	CST7	chr20	0	0	0	0	0	0
ENSG00000078018	19.9706	2.93377	2.0235	1.44985	0.147101	0.618564	MAP2	chr2	0	0	0.007817	0.00827	0.003622	0.048959
ENSG00000078043	6432.12	-0.508137	0.278423	-1.82506	0.0679926	0.46158	PIAS2	chr18	11.7126	9.73718	6.78531	5.62895	4.30722	4.01191
ENSG00000078053	372.26	0.0251811	0.759559	0.0331523	0.973553	0.996639	AMPH	chr7	1.85339	0.425989	0.652654	2.0944	1.42753	0.971295
ENSG00000078061	196.216	0.806737	0.523502	1.54104	0.123307	0.580547	ARAF	chrX	0.487464	0.918691	1.09943	1.25187	2.09538	1.23755
ENSG00000078070	380.753	-0.656187	0.489333	-1.34098	0.179925	0.673869	MCCC1	chr3	2.90452	1.5207	3.9784	2.6057	2.70665	2.10685
ENSG00000078081	226.99	-0.650048	0.580414	-1.11997	0.262725	0.755278	LAMP3	chr3	0.653549	1.44744	2.11114	0.302806	0.945237	0.400058
ENSG00000078098	0.170899	1.08307	4.08047	0.265428	0.79068	NA	FAP	chr2	0	0	0	0	0.005809	0
ENSG00000078114	1149.44	-0.332689	0.416981	-0.797853	0.424956	0.867074	NEBL	chr10	0.733882	0.712216	0.436976	0.429837	0.320815	0.407922
ENSG00000078124	372.441	-1.50253	0.533445	-2.81666	0.00485257	0.143362	ACER3	chr11	0.615956	0.241882	0.532891	0.254406	0.237395	0.143986
ENSG00000078140	2939.02	-0.0535269	0.309144	-0.173145	0.862537	0.979848	UBE2K	chr4	10.4373	11.1139	9.96466	9.5935	15.1635	9.88691
ENSG00000078142	324.778	-1.2303	0.508805	-2.41801	0.0156057	0.244591	PIK3C3	chr18	0.512429	0.399432	0.988548	0.371025	0.1826	0.119508
ENSG00000078177	4308.24	-0.159326	0.392068	-0.406375	0.684467	0.947786	N4BP2	chr4	5.94382	14.0278	7.96	9.82206	10.6584	7.10402
ENSG00000078237	5763.02	-0.225197	0.286575	-0.785823	0.431971	0.869842	TIGAR	chr12	25.1957	28.3791	30.1969	35.7296	15.7213	35.0576
ENSG00000078246	37827	-0.723331	0.2823	-2.56228	0.0103988	0.203221	TULP3	chr12	198.5	70.911	52.9971	94.8964	92.5999	126.488
ENSG00000078269	2437.69	-0.143236	0.333683	-0.429258	0.667735	0.945891	SYNJ2	chr6	1.80966	2.64573	1.95467	2.19979	2.83435	1.5484
ENSG00000078295	420.259	-0.860217	0.739075	-1.16391	0.24446	0.739768	ADCY2	chr5	0.501544	0.142799	0.137964	0.341474	0.079025	0.111956
ENSG00000078304	34616.9	-0.401999	0.383585	-1.048	0.294636	0.775818	PPP2R5C	chr14	130.274	150.413	65.2435	40.5943	25.8344	289.846
ENSG00000078319	170.11	0.0198461	0.631965	0.0314038	0.974948	0.996639	PMS2P1	chr7	2.33468	3.60098	1.20764	3.03238	3.99553	1.45642
ENSG00000078328	1344.62	-0.300712	0.326031	-0.922343	0.35635	0.824539	RBFOX1	chr16	1.07401	0.458028	0.359993	0.287371	0.177277	3.05061
ENSG00000078369	5536.3	0.105093	0.339647	0.309419	0.757003	0.962068	GNB1	chr1	25.3339	19.6342	32.9187	35.2412	43.3748	17.3626
ENSG00000078399	79.091	0.00607299	1.37616	0.004413	0.996479	0.999543	HOXA9	chr7	0.603195	1.65664	0.255836	2.47112	0	0.425205
ENSG00000078401	472.521	-1.56379	0.78856	-1.98309	0.0473575	0.394828	EDN1	chr6	5.51339	6.2002	6.17728	2.03945	0.148598	4.55344
ENSG00000078403	1585.85	-0.204936	0.479125	-0.427731	0.668847	0.945891	MLLT10	chr10	1.51575	0.821546	1.39309	1.56864	1.93543	0.72758
ENSG00000078487	1090.19	0.0112613	0.321988	0.0349743	0.9721	0.996639	ZCWPW1	chr7	4.81774	6.54117	7.7848	6.89847	7.84415	6.1044
ENSG00000078549	16.7292	-0.391148	2.68673	-0.145585	0.884249	0.982358	ADCYAP1R1	chr7	0.072247	0	0.082019	0.076537	0	0
ENSG00000078579	0	NA	NA	NA	NA	NA	FGF20	chr8	0	0	0	0	0	0
ENSG00000078589	0	NA	NA	NA	NA	NA	P2RY10	chrX	0	0	0	0	0	0
ENSG00000078596	0	NA	NA	NA	NA	NA	ITM2A	chrX	0	0	0	0	0	0
ENSG00000078618	229.382	-0.0787203	0.531232	-0.148184	0.882197	0.981627	NRDC	chr1	0.70088	0.44252	1.81469	0.259374	0.339614	0.393496
ENSG00000078668	391.105	0.554037	0.395884	1.39949	0.161665	0.643211	VDAC3	chr8	1.44548	1.37367	2.27535	2.32122	2.90503	1.75018
ENSG00000078674	15267.2	-0.5137	0.25604	-2.00633	0.0448211	0.388082	PCM1	chr8	73.9667	34.491	26.8347	65.036	35.616	43.5541
ENSG00000078687	379.545	-0.685689	0.544904	-1.25837	0.208259	0.703923	TNRC6C	chr17	0.264942	0.748007	0.521542	0.390771	0.389618	0.244348
ENSG00000078699	340.884	0.328363	0.480985	0.682689	0.494803	0.895776	CBFA2T2	chr20	0.169748	0.385892	2.4653	0.448373	0.245735	0.340334
ENSG00000078725	3235.7	-0.501436	0.393321	-1.27488	0.202352	0.697284	BRINP1	chr9	5.32626	2.97829	1.6171	1.62328	1.34314	1.65598
ENSG00000078747	2547.15	-0.424408	0.349099	-1.21572	0.22409	0.723138	ITCH	chr20	10.8548	6.73577	10.0667	5.89922	7.33965	7.29386
ENSG00000078795	1.25422	-2.5601	3.94595	-0.648793	0.516472	NA	PKD2L2	chr5	0.042989	0.016233	0.025583	0	0.01026	0
ENSG00000078804	1407.52	0.358533	0.482199	0.743537	0.457157	0.883646	TP53INP2	chr20	2.15695	5.55328	6.43685	4.58865	7.14008	8.31359
ENSG00000078808	148.268	0.677585	0.793384	0.854044	0.393081	0.847464	SDF4	chr1	0.087719	0.724949	0.764794	0.721535	0.358534	0.845702
ENSG00000078814	10.903	-0.499472	2.53393	-0.197114	0.843739	0.977415	MYH7B	chr20	0.140191	0	0.136796	0.209611	0	0.004975
ENSG00000078898	0.153734	-0.840481	4.08047	-0.205976	0.836809	NA	BPIFB2	chr20	0	0	0.003652	0	0	0
ENSG00000078900	61.8745	-0.53171	0.897172	-0.592651	0.553415	0.917308	TP73	chr1	0.035832	0.025095	0.093981	0.079094	0.025039	0.03128
ENSG00000078902	1667.15	0.533462	0.491145	1.08616	0.277408	0.765853	TOLLIP	chr11	1.62161	1.15387	2.76883	4.25265	1.54553	3.06696
ENSG00000078967	199.301	-0.489447	0.513534	-0.953094	0.340542	0.813199	UBE2D4	chr7	2.41981	2.80972	1.91021	2.4965	1.27597	2.71387
ENSG00000079101	529.464	-1.18569	1.96766	-0.602591	0.546781	0.914447	CLUL1	chr18	1.42523	0.716115	3.05743	2.27428	1.02115	0
ENSG00000079102	10284.5	-0.428816	0.307358	-1.39517	0.162965	0.645856	RUNX1T1	chr8	39.3017	27.4593	47.8083	23.5643	4.62646	11.4807
ENSG00000079112	677.353	-0.569025	0.476316	-1.19464	0.232229	0.729088	CDH17	chr8	3.50198	5.33594	2.45035	3.24321	3.79789	1.58229
ENSG00000079134	762.333	-0.254904	0.432254	-0.589708	0.555387	0.918664	THOC1	chr18	1.96229	3.25922	4.20428	2.96088	3.46763	4.78167
ENSG00000079150	15.2094	-0.40988	1.81197	-0.226206	0.821041	0.973714	FKBP7	chr2	0.060463	0.754595	0.184244	0.101748	0	0.514118
ENSG00000079156	581.399	-0.614658	0.54023	-1.13777	0.255216	0.75094	OSBPL6	chr2	0.874675	0.726245	1.24069	1.16673	0.325007	0.440465
ENSG00000079215	2.39258	4.79636	3.92562	1.22181	0.22178	NA	SLC1A3	chr5	0	0.000887	0.001478	0	0.010352	0.008791
ENSG00000079246	1558.15	-0.361185	0.343148	-1.05256	0.292542	0.775264	XRCC5	chr2	7.03779	6.79114	9.92879	4.48245	6.77917	4.59241
ENSG00000079257	26.8276	0.347937	1.48869	0.23372	0.815202	0.972227	LXN	chr3	0	0.289372	0.468774	0.302361	0.296763	0.459018
ENSG00000079263	6.03791	0.701516	2.82647	0.248195	0.803984	NA	SP140	chr2	0.009286	0.001411	0	0.002396	0.000217	0.019183
ENSG00000079277	4207.44	-0.547956	0.325308	-1.68442	0.0920998	0.516025	MKNK1	chr1	47.8401	35.7666	51.7684	9.73517	10.6578	37.4096
ENSG00000079308	71.523	0.499353	1.12174	0.445161	0.656204	0.943682	TNS1	chr2	0.009945	0.02494	0.048729	0.033561	0.004327	0.087828
ENSG00000079313	689.327	0.4256	0.553668	0.768693	0.442076	0.877159	REXO1	chr19	3.03459	8.69334	4.18805	2.966	15.0477	10.8978
ENSG00000079332	6049.83	0.0507606	0.31456	0.16137	0.871802	0.979848	SAR1A	chr10	8.50403	10.8956	41.7142	14.9163	9.94488	12.4081
ENSG00000079335	15.4223	6.51194	1.95584	3.32949	0.000870059	0.0539098	CDC14A	chr1	0	0.00044	0	0.149343	0.146757	0.036566
ENSG00000079337	36.4179	4.65919	2.67815	1.73971	NA	NA	RAPGEF3	chr12	0	0	0.015367	0	0.265714	0
ENSG00000079385	4.79022	5.79738	3.9162	1.48036	0.138777	NA	CEACAM1	chr19	0	0	0	0.005751	0	0.077558
ENSG00000079387	361.561	-0.0149131	0.482136	-0.0309313	0.975324	0.996639	SENP1	chr12	1.4676	0.798518	1.24376	2.11745	0.818431	0.445231
ENSG00000079393	0.324633	0.1213	4.08047	0.0297269	0.976285	NA	DUSP13	chr10	0	0	0.010777	0	6.2e-05	0
ENSG00000079432	14.6109	-0.912247	1.72855	-0.527752	0.597672	0.930919	CIC	chr19	0.014504	0.034806	0.014885	0.023563	0.011485	0
ENSG00000079435	69.5178	-1.29017	0.784112	-1.64539	0.0998904	0.533143	LIPE	chr19	0.420771	0.293665	0.179933	0.269411	0.086084	0.095112
ENSG00000079459	47394.1	0.45892	0.356021	1.28902	0.19739	0.691219	FDFT1	chr8	179.844	173.632	194.152	239.397	429.51	221.668
ENSG00000079462	5.1703	-0.224015	2.17614	-0.102941	0.91801	NA	PAFAH1B3	chr19	0.082714	0.150649	0.461929	0.110089	0.256155	0.030062
ENSG00000079482	110.206	-0.292489	0.692705	-0.422241	0.672849	0.945891	OPHN1	chrX	0.143242	0.292073	0.351607	0.288624	0.276223	0.140655
ENSG00000079557	0	NA	NA	NA	NA	NA	AFM	chr4	0	0	0	0	0	0
ENSG00000079616	482.31	0.518087	0.492669	1.05159	0.292987	0.775264	KIF22	chr16	1.50786	1.0612	0.859946	4.98655	2.7499	1.16329
ENSG00000079689	0	NA	NA	NA	NA	NA	SCGN	chr6	0	0	0	0	0	0
ENSG00000079691	12078.5	-1.17847	0.278784	-4.22717	2.37e-05	0.00666007	CARMIL1	chr6	54.4463	41.9138	53.7796	27.6952	29.8855	22.7551
ENSG00000079739	201.486	-1.00269	0.872569	-1.14913	0.250504	0.747381	PGM1	chr1	0.023355	4.0023	1.54766	0.074739	0.19979	0.125636
ENSG00000079785	531.476	-1.30021	0.418948	-3.1035	0.00191244	0.0856844	DDX1	chr2	3.52133	2.57242	3.81783	2.08952	1.31034	1.10536
ENSG00000079805	173.981	0.893213	0.746791	1.19607	0.23167	0.728613	DNM2	chr19	0.105649	0.143711	0.172998	0.146154	0.118075	0.128935
ENSG00000079819	7272.5	-0.109059	0.301655	-0.361536	0.717699	0.953669	EPB41L2	chr6	21.0159	29.1581	42.8916	26.7881	42.8495	21.5156
ENSG00000079841	20.3645	-5.28402	1.42046	-3.71994	0.000199269	0.0220358	RIMS1	chr6	0.014001	0.00871	0.015904	0.000438	0.000166	0.000597
ENSG00000079931	5.75184	-5.94342	3.91412	-1.51846	0.128899	NA	MOXD1	chr6	0	0.108851	0.00183	0	0	0
ENSG00000079950	6258.23	-0.184607	0.311842	-0.591988	0.553859	0.917707	STX7	chr6	6.73513	9.0574	5.62721	6.04929	8.01024	7.35663
ENSG00000079974	641.337	-0.764019	0.394679	-1.9358	0.052892	0.415656	RABL2B	chr22	3.0394	4.84336	4.2759	3.55986	1.53398	0.923385
ENSG00000079999	71.9332	-0.930034	0.858604	-1.08319	0.278723	0.767208	KEAP1	chr19	0.37483	0.414411	1.0316	0.594438	0.148031	0.168831
ENSG00000080007	10893.8	-0.759841	0.529518	-1.43497	0.151296	0.626344	DDX43	chr6	115.591	152.568	50.658	117.777	34.7466	53.7444
ENSG00000080031	426.23	0.147715	0.52403	0.281882	0.778034	0.967522	PTPRH	chr19	1.85786	0.757116	0.753275	1.86366	1.32569	1.13474
ENSG00000080166	8185.57	-0.266932	0.341505	-0.781634	0.43443	0.871377	DCT	chr13	26.5731	15.9144	35.1619	23.0307	20.5677	17.7464
ENSG00000080189	155.879	0.420667	0.573261	0.733814	0.463062	0.887172	SLC35C2	chr20	0.555603	0.355784	0.202016	0.521182	0.592104	0.920149
ENSG00000080200	1519.11	-0.697756	0.462717	-1.50795	0.131566	0.593838	CRYBG3	chr3	4.10741	3.42687	4.21345	5.75092	3.23275	5.88711
ENSG00000080224	4.04739	-4.40538	2.83334	-1.55484	0.119985	NA	EPHA6	chr3	0.009445	0.005482	0.017684	0	0	0.002753
ENSG00000080293	0.922405	-3.30252	3.95233	-0.835587	0.403388	NA	SCTR	chr2	0	0	0.073995	0	0	0
ENSG00000080298	171.646	0.894382	0.710344	1.25908	0.208	0.703923	RFX3	chr9	0.452959	0.076382	0.18798	0.208073	2.74133	1.45676
ENSG00000080345	18083	-0.315118	0.283141	-1.11294	0.265736	0.756288	RIF1	chr2	11.3595	14.6562	36.0344	11.689	14.039	12.7416
ENSG00000080371	1193.35	-0.0451261	0.519695	-0.0868318	0.930805	0.989667	RAB21	chr12	0.658372	2.23588	5.4549	1.41265	8.56702	0.981263
ENSG00000080493	0	NA	NA	NA	NA	NA	SLC4A4	chr4	0	0	0	0	0	0
ENSG00000080503	2242.34	-0.137838	0.408051	-0.337796	0.735517	0.957669	SMARCA2	chr9	1.6246	2.17435	9.35556	1.74956	10.2242	1.48318
ENSG00000080511	6.85325	-6.19574	3.91294	-1.5834	0.113331	NA	RDH8	chr19	0	0.339207	0	0	0	0
ENSG00000080546	5658.2	-0.330787	0.362487	-0.912549	0.36148	0.82814	SESN1	chr6	40.836	12.4605	32.4506	33.0298	11.4235	21.7732
ENSG00000080561	0.153734	-0.840481	4.08047	-0.205976	0.836809	NA	MID2	chrX	0	0	0.00196	0	0	0
ENSG00000080572	0	NA	NA	NA	NA	NA	PIH1D3	chrX	0	0	0	0	0	0
ENSG00000080573	0	NA	NA	NA	NA	NA	COL5A3	chr19	0	0	0	0	0	0
ENSG00000080603	375.583	0.610219	0.565157	1.07973	0.28026	0.767475	SRCAP	chr16	6.05597	8.92243	3.47364	4.95298	10.77	8.06832
ENSG00000080608	2359.69	-0.687364	0.304085	-2.26043	0.0237945	0.296713	PUM3	chr9	18.9655	27.8571	19.8563	15.8924	12.6628	12.0626
ENSG00000080618	5.16384	5.90573	3.91551	1.50829	0.13148	NA	CPB2	chr13	0	0	0	0	0	0.305359
ENSG00000080644	537.781	-0.294366	0.428026	-0.68773	0.491623	0.894425	CHRNA3	chr15	4.1806	2.18743	2.24336	3.07062	3.41699	1.87486
ENSG00000080709	1849.08	0.385371	0.367372	1.049	0.29418	0.775818	KCNN2	chr5	9.80979	18.0825	5.486	20.148	31.2802	2.6248
ENSG00000080802	5380.04	-0.419324	0.327114	-1.28189	0.19988	0.694017	CNOT4	chr7	11.5157	21.4406	29.1479	9.39917	11.7443	13.7528
ENSG00000080815	784.679	-0.705861	0.463125	-1.52413	0.127477	0.587396	PSEN1	chr14	3.28894	3.39395	1.37231	2.85633	0.715059	0.714014
ENSG00000080819	29.062	-0.820262	2.08589	-0.393242	0.694141	0.94971	CPOX	chr3	1.3278	2.29828	1.13228	1.82707	1.05205	0.933312
ENSG00000080822	1927.88	0.168221	0.570122	0.295061	0.767947	0.964036	CLDND1	chr3	12.0198	25.7839	6.55534	24.8266	19.3237	6.77308
ENSG00000080823	564.256	0.453484	0.51768	0.875994	0.381033	0.840638	MOK	chr14	0.633106	1.12662	0.90008	2.90833	3.45459	0.87435
ENSG00000080824	9719.49	-0.105585	0.452924	-0.233118	0.815669	0.972227	HSP90AA1	chr14	37.9351	48.6885	98.1226	40.4357	55.5086	42.5608
ENSG00000080839	73.0577	-2.09079	0.715398	-2.92256	0.00347165	0.121234	RBL1	chr20	0.229202	0.577994	0.487442	0.179504	0.086578	0.067093
ENSG00000080845	668.861	-0.115358	0.442631	-0.260618	0.794387	0.971524	DLGAP4	chr20	6.46972	4.07664	2.54026	6.45728	0.39434	0.638739
ENSG00000080854	1.53466	1.01995	3.85663	0.264466	0.791421	NA	IGSF9B	chr11	0.00393	0	0.029108	0	0.011194	0
ENSG00000080910	0	NA	NA	NA	NA	NA	CFHR2	chr1	0	0	0	0	0	0
ENSG00000080947	0	NA	NA	NA	NA	NA	CROCCP3	chr1	0	0	0	0.016204	0.085514	0
ENSG00000080986	1261.62	-0.860307	0.326326	-2.63635	0.00838044	0.183083	NDC80	chr18	11.4784	8.20657	11.6825	6.64027	4.3371	5.01135
ENSG00000081014	20.5642	0.667223	1.86148	0.358437	0.720017	0.954088	AP4E1	chr15	0.075403	0	0.045252	0.151137	0.005938	0.063821
ENSG00000081019	405.377	0.303759	0.682572	0.44502	0.656305	0.943691	RSBN1	chr1	0.326	0.820254	1.80619	0.761624	2.25088	1.10561
ENSG00000081026	695.671	0.223152	0.486359	0.45882	0.646363	0.940862	MAGI3	chr1	1.76249	0.836442	2.29432	1.30916	5.34546	1.78582
ENSG00000081041	0.170899	1.08307	4.08047	0.265428	0.79068	NA	CXCL2	chr4	0	0	0	0	0.049909	0
ENSG00000081051	0	NA	NA	NA	NA	NA	AFP	chr4	0	0	0	0	0	0
ENSG00000081052	773.592	0.283784	0.632192	0.44889	0.653511	0.943247	COL4A4	chr2	1.84845	0.256095	1.28145	1.25794	2.14515	1.47486
ENSG00000081059	2841.66	0.338443	0.419641	0.806507	0.419951	0.86455	TCF7	chr5	1.20843	1.66037	3.17916	2.15451	3.45398	2.62728
ENSG00000081087	2285.76	-0.15704	0.313338	-0.501184	0.616242	0.934486	OSTM1	chr6	17.8039	12.4675	13.6901	15.5672	15.7994	16.7457
ENSG00000081138	2.76722	-4.88595	3.92205	-1.24576	0.212851	NA	CDH7	chr18	0	0	0.011716	0	0	0
ENSG00000081148	3.2148	4.1915	3.85311	1.08782	0.276674	NA	IMPG2	chr3	0	0	0.004088	0.044469	0.000386	0
ENSG00000081154	5008.66	-0.51008	0.308758	-1.65203	0.0985275	0.530933	PCNP	chr3	36.9443	30.6467	30.5852	15.7837	23.7028	23.6779
ENSG00000081177	1466.42	0.335201	0.550392	0.609023	0.542509	0.913291	EXD2	chr14	2.81298	4.76526	1.80926	6.0948	0.834916	1.1361
ENSG00000081181	273.607	0.0108923	0.563436	0.0193318	0.984576	0.998252	ARG2	chr14	18.5274	33.6214	15.874	79.4213	19.1081	32.3113
ENSG00000081189	53.384	0.824139	2.07618	0.396949	0.691405	0.949453	MEF2C	chr5	0.051302	0.00695	0.164477	0.19404	0	0.112909
ENSG00000081237	5.49221	-3.36956	3.2906	-1.024	0.305837	NA	PTPRC	chr1	0	0.001883	0.052571	0.004152	0	0
ENSG00000081248	0	NA	NA	NA	NA	NA	CACNA1S	chr1	0	0	0	0	0	0
ENSG00000081277	0.153734	-0.840481	4.08047	-0.205976	0.836809	NA	PKP1	chr1	0	0	0.005186	0	0	0
ENSG00000081307	934.779	-0.107693	0.423668	-0.254192	0.799348	0.971691	UBA5	chr3	5.89868	4.78043	2.59506	2.0709	2.14105	1.84078
ENSG00000081320	872.408	-0.55576	0.773444	-0.718553	0.472416	0.890679	STK17B	chr2	0.440899	8.70562	1.4841	3.75	1.30225	1.55519
ENSG00000081377	9.15574	-1.5311	2.47736	-0.618036	0.536551	0.912385	CDC14B	chr9	0.043869	0.02792	0.041673	0.074958	0.004476	0.099372
ENSG00000081386	269.256	-1.0469	0.525644	-1.99166	0.0464088	0.392466	ZNF510	chr9	0.594539	1.59916	1.19537	0.511877	0.525397	0.747867
ENSG00000081479	72.7318	-3.32239	1.45831	-2.27825	0.0227116	0.288639	LRP2	chr2	0.409585	0.022948	0.027894	0.007595	0.044224	0
ENSG00000081665	2942.6	-0.459407	0.297287	-1.54533	0.122266	0.578591	ZNF506	chr19	28.0423	27.1755	18.1374	33.3429	37.8167	26.6039
ENSG00000081692	5.70988	1.3533	3.76409	0.359529	0.719199	NA	JMJD4	chr1	0.091078	0.192732	0.215554	0.058096	0.058477	0.672571
ENSG00000081721	1335.16	-0.0775645	0.310687	-0.249655	0.802854	0.972204	DUSP12	chr1	20.5456	18.2907	20.3168	23.0803	20.526	20.1723
ENSG00000081760	975.134	0.175874	0.371814	0.473016	0.636202	0.937305	AACS	chr12	0.720162	0.593482	0.798687	2.45691	0.668374	1.09827
ENSG00000081791	144.093	-0.192157	0.674307	-0.284969	0.775668	0.967349	KIAA0141	chr5	0.326085	1.16709	0.505067	0.547283	1.92825	0.369015
ENSG00000081800	0	NA	NA	NA	NA	NA	SLC13A1	chr7	0	0	0	0	0	0
ENSG00000081803	622.69	-0.355705	0.434838	-0.818016	0.413348	0.861075	CADPS2	chr7	1.18405	1.68659	3.52266	1.71996	1.89357	1.81489
ENSG00000081818	0.341798	1.98803	4.03703	0.492449	0.622402	NA	PCDHB4	chr5	0	0	0	0	0.022926	0
ENSG00000081842	0	NA	NA	NA	NA	NA	PCDHA6	chr5	0	0	0.013523	0.003139	0.007125	0
ENSG00000081853	0.170899	1.08307	4.08047	0.265428	0.79068	NA	PCDHGA2	chr5	0	0.008248	0.018367	0.042927	0.009651	0
ENSG00000081870	832.087	-0.750078	0.572264	-1.31072	0.189953	0.68481	HSPB11	chr1	4.80555	8.24494	15.4765	1.19785	8.53665	7.07225
ENSG00000081913	1821	0.597577	0.394797	1.51363	0.13012	0.591692	PHLPP1	chr18	0.33435	0.498024	0.26687	0.930405	8.78421	0.662667
ENSG00000081923	600.259	0.975961	0.842761	1.15805	0.246843	0.742639	ATP8B1	chr18	2.62705	0.135933	1.2159	4.63598	1.19608	2.82517
ENSG00000081985	0	NA	NA	NA	NA	NA	IL12RB2	chr1	0	0	0	0	0	0
ENSG00000082014	20.16	1.09041	1.83091	0.595557	0.551471	0.916595	SMARCD3	chr7	0.05448	0.067282	0.009003	0.01473	0.108951	0.06719
ENSG00000082068	3616.79	-0.268853	0.401942	-0.668885	0.503569	0.898368	WDR70	chr5	29.1452	19.0259	12.0087	23.4451	11.8878	16.9724
ENSG00000082074	0.489518	-2.4152	3.99051	-0.605236	0.545022	NA	FYB1	chr5	0	0.001683	0	0	0	0
ENSG00000082126	109.342	0.337338	0.917231	0.367779	0.713038	0.953669	MPP4	chr2	0.130135	0.170551	0.722196	0.888427	0.23413	0.304777
ENSG00000082146	1198.95	-1.2702	0.427439	-2.97166	0.00296197	0.112437	STRADB	chr2	9.65176	10.572	4.25108	4.96821	3.68693	4.07819
ENSG00000082153	5135.33	0.132981	0.335307	0.396593	0.691667	0.949453	BZW1	chr2	13.6355	17.7791	11.5264	21.6567	13.5573	11.683
ENSG00000082175	10.4721	0.895372	2.4149	0.37077	0.710809	0.953463	PGR	chr11	0.008076	0.017669	0	0.057109	0	0.005391
ENSG00000082196	0.153734	-0.840481	4.08047	-0.205976	0.836809	NA	C1QTNF3	chr5	0	0	0.008992	0	0	0
ENSG00000082212	339.606	0.939483	0.63364	1.48268	0.138161	0.60342	ME2	chr18	0.361679	0.445889	0.110493	0.385844	0.596477	1.00962
ENSG00000082213	7376.26	-0.404775	0.29285	-1.38219	0.166912	0.650174	C5orf22	chr5	21.6436	17.5806	56.0675	20.194	18.3363	15.5407
ENSG00000082258	1159.36	-0.209375	0.365887	-0.572239	0.56716	0.922331	CCNT2	chr2	5.04612	3.85971	2.68601	8.28377	4.13626	5.18598
ENSG00000082269	1175.56	-0.648605	0.322139	-2.01343	0.0440691	0.384897	FAM135A	chr6	2.7066	2.799	4.11746	2.27554	1.62996	1.80021
ENSG00000082293	0	NA	NA	NA	NA	NA	COL19A1	chr6	0	0	0.002104	0	0	0
ENSG00000082397	197.032	-0.0861013	0.697181	-0.123499	0.901712	0.985238	EPB41L3	chr18	0.217398	0.165856	0.138074	0.048359	0.190538	0.461195
ENSG00000082438	9321.86	-0.509384	0.258608	-1.96972	0.048871	0.401433	COBLL1	chr2	10.736	17.031	9.9114	9.43483	18.2051	4.84549
ENSG00000082458	1576.17	0.199281	0.294726	0.676159	0.49894	0.896302	DLG3	chrX	2.66878	2.10884	1.96036	2.3153	2.28895	3.58678
ENSG00000082482	0	NA	NA	NA	NA	NA	KCNK2	chr1	0	0	0	0	0	0
ENSG00000082497	22.2168	21.3664	3.16539	6.75	NA	NA	SERTAD4	chr1	0	0	0	0	0.478904	0
ENSG00000082512	421.411	-1.35594	0.698003	-1.94259	0.0520654	0.411051	TRAF5	chr1	0.273519	1.91874	1.15398	0.341746	0.100062	0.193714
ENSG00000082515	1819.41	0.76662	0.302648	2.53304	0.0113078	0.211594	MRPL22	chr5	5.5684	8.45527	3.72113	20.5901	12.3935	14.7021
ENSG00000082516	43871.6	-0.394112	0.401396	-0.981853	0.326172	0.802375	GEMIN5	chr5	232.334	137.281	126.128	189.696	148.835	97.0255
ENSG00000082556	0	NA	NA	NA	NA	NA	OPRK1	chr8	0	0	0	0	0	0
ENSG00000082641	647.428	0.442999	0.363951	1.21719	0.22353	0.72297	NFE2L1	chr17	1.08662	1.77838	1.47912	1.88301	2.10112	1.98278
ENSG00000082684	0.93957	-2.07811	3.96135	-0.524598	0.599863	NA	SEMA5B	chr3	0	0	0.013326	0	0.000544	0
ENSG00000082701	627.581	-0.101954	0.466537	-0.218533	0.827014	0.974806	GSK3B	chr3	1.05571	1.36617	2.97251	1.71308	1.78381	1.4368
ENSG00000082781	444.407	1.42088	0.494047	2.876	0.00402755	0.129304	ITGB5	chr3	0.214305	0.360204	1.42442	0.761934	0.857011	1.58645
ENSG00000082805	3394	-0.0951926	0.333505	-0.285431	0.775314	0.967143	ERC1	chr12	3.82575	2.34443	4.10512	4.94892	1.80204	2.77196
ENSG00000082898	583.06	0.101735	0.593137	0.171521	0.863814	0.979848	XPO1	chr2	0.573079	1.82693	3.80161	0.838456	1.19792	2.90252
ENSG00000082929	0	NA	NA	NA	NA	NA	LINC01587	chr4	0	0	0	0	0	0
ENSG00000082996	3682.4	-0.176347	0.314722	-0.560326	0.575257	0.92468	RNF13	chr3	29.6169	12.7951	27.0337	18.3926	15.537	27.8134
ENSG00000083067	29.585	0.248722	1.88711	0.1318	NA	NA	TRPM3	chr9	0.00056	0.028504	0.004556	0.070844	0	0.001579
ENSG00000083093	6138.96	-0.984229	0.353669	-2.78291	0.00538735	0.150355	PALB2	chr16	33.4989	38.5311	22.8453	19.638	16.1689	19.0757
ENSG00000083097	8588.05	-1.03269	0.379146	-2.72372	0.00645518	0.162389	DOPEY1	chr6	26.4668	22.4831	17.4319	12.8616	17.0901	8.46573
ENSG00000083099	213.802	-0.0684106	0.491	-0.139329	0.88919	0.982845	LYRM2	chr6	1.28565	3.47386	3.62814	1.19876	1.15141	1.56325
ENSG00000083123	3073.12	-0.191563	0.374114	-0.512044	0.60862	0.93216	BCKDHB	chr6	19.3317	14.4723	26.535	14.5933	12.8326	18.0649
ENSG00000083168	1355.53	-0.201019	0.427024	-0.470745	0.637823	0.938089	KAT6A	chr8	2.04608	3.04098	2.35058	1.7129	3.57603	1.6934
ENSG00000083223	3154.47	-0.122999	0.319333	-0.385176	0.700107	0.951728	ZCCHC6	chr9	8.20714	9.30385	10.9939	9.52732	7.56424	11.1707
ENSG00000083290	1176.54	-0.143274	0.365713	-0.391766	0.695231	0.95047	ULK2	chr17	1.66758	2.27784	3.05871	1.98427	3.05317	2.09903
ENSG00000083307	911.82	-0.788602	0.368561	-2.13968	0.0323805	0.340272	GRHL2	chr8	4.80283	3.29178	3.41253	2.63284	2.00928	2.29243
ENSG00000083312	6729.28	-0.511097	0.256833	-1.99	0.0465908	0.392915	TNPO1	chr5	6.4661	6.87235	5.70381	5.16677	4.84799	4.68534
ENSG00000083444	126.667	0.0637016	1.0064	0.0632963	0.949531	0.991878	PLOD1	chr1	0.329948	0.311295	0.115431	0.457927	0.009203	1.1837
ENSG00000083454	181.859	0.111533	0.674043	0.165469	0.868575	0.979848	P2RX5	chr17	1.08549	0.854781	0.505345	0.7077	0.969998	0.896733
ENSG00000083457	1107.01	0.122591	0.453003	0.270618	0.786685	0.969546	ITGAE	chr17	14.922	1.73517	4.73716	6.93573	5.7576	12.7473
ENSG00000083520	58.6124	1.15839	0.688067	1.68354	0.0922712	0.51631	DIS3	chr13	0.073464	0.19841	0.127682	0.242268	0.165749	0.37892
ENSG00000083535	3307.61	-0.708347	0.295976	-2.39325	0.0166996	0.252301	PIBF1	chr13	15.134	14.7195	19.8528	15.2741	13.1947	3.72047
ENSG00000083544	547.817	-0.974315	0.596038	-1.63465	0.102122	0.538117	TDRD3	chr13	1.01875	2.04119	0.159642	1.78628	1.75928	0.12134
ENSG00000083622	0	NA	NA	NA	NA	NA	AC000061.1	chr7	0	0	0	0	0	0
ENSG00000083635	3887.16	-0.38836	0.308384	-1.25934	0.207908	0.703923	NUFIP1	chr13	26.706	26.7907	32.3277	21.9413	29.6578	22.8539
ENSG00000083642	1883.98	-0.414176	0.332114	-1.24709	0.212365	0.708653	PDS5B	chr13	3.68199	2.96313	3.38269	2.35171	3.2002	2.22527
ENSG00000083720	36.8322	-0.167797	1.39513	-0.120273	0.904267	0.986045	OXCT1	chr5	0.161406	0.006637	0.39512	0.156123	0.06203	0.279211
ENSG00000083750	731.782	-0.172237	0.472851	-0.364252	0.71567	0.953669	RRAGB	chrX	7.43541	8.44568	4.08133	9.94939	5.08978	6.74207
ENSG00000083782	0	NA	NA	NA	NA	NA	EPYC	chr12	0	0	0	0	0	0
ENSG00000083799	1856.39	-0.121646	0.32348	-0.376055	0.706876	0.953059	CYLD	chr16	2.82658	6.63441	3.1563	3.42031	3.50118	2.02059
ENSG00000083807	32.9963	1.40391	0.962998	1.45786	0.14488	0.615546	SLC27A5	chr19	0.037148	0.082191	0.021591	0.043251	0.413926	0.083169
ENSG00000083812	1620.99	0.124417	0.576384	0.215858	0.829099	0.974806	ZNF324	chr19	9.83657	2.18763	3.24486	6.97057	7.09714	5.73033
ENSG00000083814	17.894	4.07417	2.37438	1.71589	0.0861826	0.505975	ZNF671	chr19	0	0.031667	0	0.292004	0.322762	0
ENSG00000083817	213.599	0.464751	0.523477	0.887816	0.37464	0.836414	ZNF416	chr19	1.78265	0.952744	1.1147	2.63512	2.11007	1.43019
ENSG00000083828	564.914	-0.92436	0.743687	-1.24294	0.213889	0.710614	ZNF586	chr19	4.94332	6.32021	4.58216	6.02614	1.33246	0.684507
ENSG00000083838	11.6801	-1.27672	2.87818	-0.443587	0.657341	0.944042	ZNF446	chr19	0.030978	0.531754	0.025387	0.07204	0.318195	0.008665
ENSG00000083844	54.8892	1.26104	1.49369	0.84425	0.39853	0.851952	ZNF264	chr19	0	0.086705	0.10582	0.126344	0.009936	0.251957
ENSG00000083845	5991.55	-0.0453831	0.375123	-0.120982	0.903705	0.986031	RPS5	chr19	77.4196	123.989	144.756	82.7739	139.102	121.09
ENSG00000083857	2842.7	-0.1438	0.340141	-0.422767	0.672465	0.945891	FAT1	chr4	3.28017	10.8819	3.56873	13.1784	2.82013	2.56633
ENSG00000083896	286.725	-0.0762011	0.588429	-0.129499	0.896963	0.983829	YTHDC1	chr4	0.50084	1.15108	2.25971	0.572675	2.98381	1.44927
ENSG00000083937	10749.9	-0.129961	0.32476	-0.400176	0.689027	0.948566	CHMP2B	chr3	88.2201	57.271	95.1195	106.572	86.3602	79.9298
ENSG00000084070	27.7121	0.421621	1.64157	0.25684	0.797302	0.971524	SMAP2	chr1	0.005105	0.005716	0.078253	0.087555	0	0.092714
ENSG00000084072	172.01	1.41397	0.527361	2.68122	0.00733539	0.172031	PPIE	chr1	0.150727	0.208497	0.126449	0.561108	0.613422	0.306864
ENSG00000084073	1668.19	-0.0991702	0.48953	-0.202583	0.839461	0.976479	ZMPSTE24	chr1	4.2994	12.6436	10.2015	5.66585	11.1599	11.8567
ENSG00000084090	26464.2	-0.387812	0.364847	-1.06294	0.287808	0.773251	STARD7	chr2	148.612	86.4111	198.851	122.493	130.86	86.0784
ENSG00000084092	362.082	0.130903	0.447092	0.292788	0.769684	0.964951	NOA1	chr4	2.86196	2.56149	2.87399	4.06625	2.55129	3.69215
ENSG00000084093	3403.26	0.219758	0.483009	0.454978	0.649125	0.941725	REST	chr4	5.58282	12.4513	4.76443	17.127	7.34016	7.30583
ENSG00000084110	741.149	-0.793698	0.485012	-1.63645	0.101745	0.537235	HAL	chr12	1.55313	3.30181	4.51289	2.6492	2.06415	1.39076
ENSG00000084112	5573.66	-0.0467224	0.408124	-0.114481	0.908857	0.98712	SSH1	chr12	5.80657	4.98225	10.5596	7.26729	12.6617	9.95643
ENSG00000084207	227.394	-0.220368	0.520888	-0.423061	0.672251	0.945891	GSTP1	chr11	2.71647	3.68357	2.65016	4.3281	4.8528	3.76158
ENSG00000084234	4048.13	-0.0932886	0.388738	-0.239978	0.810347	0.972223	APLP2	chr11	15.6519	29.7381	15.2815	19.9068	5.0698	10.9215
ENSG00000084444	614.664	-0.47449	0.588902	-0.80572	0.420404	0.864765	FAM234B	chr12	1.23261	3.87796	0.818369	1.69275	1.74155	1.37038
ENSG00000084453	30.2273	-0.176339	1.41066	-0.125005	0.90052	0.985053	SLCO1A2	chr12	0.024433	0.021341	0.001015	0.00215	0.027434	0.016721
ENSG00000084463	5906.31	0.1633	0.287804	0.567402	0.570441	0.923422	WBP11	chr12	24.1347	18.4311	19.5998	25.5669	28.2134	22.3836
ENSG00000084623	2032.6	-0.118117	0.353389	-0.33424	0.738198	0.957669	EIF3I	chr1	31.9863	21.9549	20.6419	27.4516	17.9962	25.3669
ENSG00000084628	4.36271	-5.54513	3.91645	-1.41586	0.156818	NA	NKAIN1	chr1	0.013338	0.164056	0	0	0	0
ENSG00000084636	14.6041	-7.28212	2.69747	-2.69961	0.00694206	0.167493	COL16A1	chr1	0.351656	0.002865	0.005234	0	0	0
ENSG00000084652	107.986	1.49288	1.20827	1.23555	0.216625	0.71294	TXLNA	chr1	0	0.453845	0.213407	0.536908	0.871679	0.554008
ENSG00000084674	2.5897	4.91206	3.92417	1.25174	0.210663	NA	APOB	chr2	0	0	0	0.00935	0.001424	0
ENSG00000084676	5016.53	-0.0912224	0.305154	-0.298939	0.764987	0.963433	NCOA1	chr2	10.4827	10.99	16.929	12.8586	13.2891	11.7148
ENSG00000084693	43.6446	0.277646	1.50663	0.184283	0.853791	0.978386	AGBL5	chr2	0.101099	0.382022	0.111442	0.596361	0	0.090751
ENSG00000084710	936.667	0.0802767	0.370827	0.21648	0.828614	0.974806	EFR3B	chr2	0.302584	0.191861	0.263064	0.291811	0.380527	0.244116
ENSG00000084731	2403.82	0.920756	0.28282	3.25563	0.00113141	0.064808	KIF3C	chr2	4.55594	4.6139	4.98113	11.8964	10.6142	8.21434
ENSG00000084733	4741.28	-0.211071	0.320622	-0.658315	0.510336	0.900752	RAB10	chr2	20.2519	36.0152	23.8377	24.3046	29.3284	23.7466
ENSG00000084734	8.13882	-1.11814	3.06897	-0.364336	0.715607	NA	GCKR	chr2	0	0.215267	0.020621	0.09223	0	0
ENSG00000084754	604	0.107609	0.437535	0.245943	0.805726	0.972204	HADHA	chr2	2.84842	3.4274	3.62179	5.94634	2.6858	2.68165
ENSG00000084764	2276.94	-0.536061	0.462445	-1.15919	0.246379	0.742353	MAPRE3	chr2	3.33837	1.82087	10.9535	1.81532	1.59924	1.67108
ENSG00000084774	618.17	0.367375	0.41801	0.878867	0.379474	0.839168	CAD	chr2	0.867846	0.683044	1.71431	1.03504	1.69485	0.875823
ENSG00000085063	2531.17	0.670762	0.397601	1.68702	0.091599	0.515232	CD59	chr11	18.5925	14.4059	4.6052	24.2924	19.4415	24.3822
ENSG00000085117	3171.65	-0.167364	0.411817	-0.406405	0.684445	0.947786	CD82	chr11	37.5405	17.2751	18.2351	15.813	31.2087	2.26807
ENSG00000085185	5063.35	0.640702	0.365171	1.75453	0.0793405	0.490777	BCORL1	chrX	3.3224	2.14343	1.8938	4.23495	4.0221	4.55101
ENSG00000085224	20444.5	-0.569755	0.278312	-2.04718	0.0406404	0.37185	ATRX	chrX	42.111	16.3989	42.8486	17.2357	9.82053	12.2755
ENSG00000085231	302.779	-0.542412	0.598283	-0.906613	0.364611	0.830329	AK6	chr5	8.68965	10.3064	22.4379	6.50263	8.10272	13.4429
ENSG00000085265	0	NA	NA	NA	NA	NA	FCN1	chr9	0	0	0	0	0	0
ENSG00000085274	1950.99	-0.628239	0.308197	-2.03843	0.041507	0.374195	MYNN	chr3	16.0708	15.2886	11.3138	9.21456	11.5562	10.5067
ENSG00000085276	445.451	-0.564115	2.06014	-0.273824	0.78422	0.969209	MECOM	chr3	0.096816	0	0.130992	0.094361	0.04373	0.024562
ENSG00000085365	1855.96	-0.354917	0.388375	-0.913852	0.360795	0.827376	SCAMP1	chr5	1.86611	3.71367	4.3337	2.31823	4.39901	2.18149
ENSG00000085377	2585.46	-0.200438	0.350865	-0.571267	0.567818	0.922331	PREP	chr6	18.5629	8.81189	12.0559	12.3129	12.9687	12.1152
ENSG00000085382	6037.05	0.463811	0.3204	1.4476	0.147729	0.619063	HACE1	chr6	18.7322	10.1633	16.1642	36.7339	27.8735	15.5778
ENSG00000085415	7074.29	-0.138148	0.347587	-0.397449	0.691036	0.949415	SEH1L	chr18	40.7917	42.7338	28.1418	55.6893	58.0121	8.69599
ENSG00000085433	4141.74	-0.28526	0.404086	-0.705939	0.480226	0.892552	WDR47	chr1	26.7281	14.1673	16.5443	15.7409	25.1821	13.5737
ENSG00000085449	19606.6	-0.901889	0.437594	-2.06102	0.0393014	0.367981	WDFY1	chr2	141.6	100.86	48.8312	80.033	52.7405	60.6841
ENSG00000085465	0.153734	-0.840481	4.08047	-0.205976	0.836809	NA	OVGP1	chr1	0	0	0.013278	0	0	0
ENSG00000085491	39.8449	1.48838	1.25302	1.18784	0.234896	0.731135	SLC25A24	chr1	0.170049	0.008569	0.073119	0.056451	0.28666	0.221998
ENSG00000085511	898.67	0.413063	0.391875	1.05407	0.291851	0.775264	MAP3K4	chr6	0.86068	0.597175	0.959553	1.69549	2.26768	0.73441
ENSG00000085514	16.2948	7.56401	2.68308	2.81915	0.00481504	0.143262	PILRA	chr7	0	0.0188	0	0.002905	0.040485	1.19635
ENSG00000085552	4039.23	0.69663	0.304072	2.291	0.0219633	0.284284	IGSF9	chr1	8.95691	9.1324	7.41609	14.6758	19.5938	12.7687
ENSG00000085563	27.9939	1.21042	2.024	0.598035	0.549817	0.916268	ABCB1	chr7	0.291591	0	0	0.083647	0.511025	0.386393
ENSG00000085644	11.4169	-0.456967	2.50013	-0.182777	0.854973	0.978386	ZNF213	chr16	0.004828	0.08079	0.012527	0.073685	0	0
ENSG00000085662	282.917	-0.384702	0.551291	-0.69782	0.48529	0.893795	AKR1B1	chr7	2.31514	5.21588	3.7375	2.54684	1.05511	1.11421
ENSG00000085719	54.9433	0.864611	1.39168	0.62127	0.534422	0.912318	CPNE3	chr8	0	0.157726	0.196347	0.085847	0.41259	0.225088
ENSG00000085721	629.032	-0.730591	0.454207	-1.6085	0.107726	0.549682	RRN3	chr16	6.12818	10.9682	8.41719	7.00447	8.67727	9.02791
ENSG00000085733	30487.1	-0.744679	0.399802	-1.86262	0.0625161	0.447217	CTTN	chr11	132.399	55.5166	120.37	66.4449	78.0917	61.9856
ENSG00000085741	0	NA	NA	NA	NA	NA	WNT11	chr11	0	0	0	0	0	0
ENSG00000085760	2669.43	-0.939961	0.418876	-2.24401	0.024832	0.3021	MTIF2	chr2	23.5619	23.7095	8.13325	10.0367	8.66624	10.1316
ENSG00000085788	1292.87	0.31354	0.418924	0.748441	0.454194	0.882138	DDHD2	chr8	2.97911	6.65104	2.84336	8.25096	2.87504	4.68837
ENSG00000085831	68.7679	0.252529	0.949995	0.265821	0.790377	0.970632	TTC39A	chr1	0.018498	0.079686	0.028994	0.080666	0.071269	0.0123
ENSG00000085832	3507.6	-0.399297	0.29079	-1.37315	0.169707	0.654668	EPS15	chr1	11.4023	16.3551	13.0446	13.5819	7.01207	8.00832
ENSG00000085840	1045.48	-0.317211	0.505307	-0.627758	0.530162	0.910494	ORC1	chr1	10.1248	4.97512	4.89492	9.78364	4.92709	3.82243
ENSG00000085871	1683.02	-0.25211	0.292392	-0.862235	0.388558	0.844807	MGST2	chr4	5.84055	11.4493	10.613	6.00713	32.1161	11.6919
ENSG00000085872	2530.2	-0.278735	0.358213	-0.778126	0.436495	0.872681	CHERP	chr19	26.6602	13.1541	13.6327	14.4216	15.5187	16.4787
ENSG00000085978	1742.89	0.179191	0.482676	0.371246	0.710454	0.953463	ATG16L1	chr2	3.47269	1.06765	2.4415	6.3868	2.76373	1.42479
ENSG00000085982	1128.33	0.175602	0.453665	0.387074	0.698702	0.951271	USP40	chr2	5.01987	1.40224	2.69289	3.09341	2.11497	3.40493
ENSG00000085998	212.157	0.377737	0.797004	0.473946	0.635538	0.937305	POMGNT1	chr1	1.47017	0.407547	0.58818	1.61184	1.00116	0.257634
ENSG00000085999	437.215	0.570782	0.6291	0.907299	0.364249	0.830156	RAD54L	chr1	5.3048	2.3399	3.09478	10.2067	3.10326	6.49871
ENSG00000086015	196.712	0.0327315	0.557437	0.0587179	0.953177	0.993278	MAST2	chr1	0.710497	0.185293	0.244878	0.591297	0.157465	1.21644
ENSG00000086061	18866.5	0.0620374	0.295126	0.210206	0.833507	0.97513	DNAJA1	chr9	137.976	136.26	141.525	145.784	149.875	201.328
ENSG00000086062	12154.2	-0.396336	0.368897	-1.07438	0.282653	0.769593	B4GALT1	chr9	49.0159	7.74776	84.6533	42.139	10.8717	47.0179
ENSG00000086065	3135.28	0.292814	0.437031	0.670007	0.502853	0.897996	CHMP5	chr9	33.1137	48.7193	20.3418	42.3021	32.1688	61.8279
ENSG00000086102	650.24	0.0293281	0.461793	0.0635092	0.949361	0.991878	NFX1	chr9	2.19223	1.37105	1.45793	2.70392	1.97332	1.17237
ENSG00000086159	0	NA	NA	NA	NA	NA	AQP6	chr12	0	0	0	0	0	0
ENSG00000086189	1388.21	0.298328	0.315164	0.946582	0.343852	0.814627	DIMT1	chr5	9.25249	7.3598	6.81006	11.9612	9.33486	7.45961
ENSG00000086200	375.476	0.325426	0.515826	0.630882	0.528117	0.909601	IPO11	chr5	0.21201	0.321749	0.232801	0.326283	0.368625	0.125546
ENSG00000086205	13.6823	-7.19111	3.52533	-2.03984	NA	NA	FOLH1	chr11	0	0	0.52826	0	0	0
ENSG00000086232	1767.27	-0.113751	0.291333	-0.390449	0.696204	0.950884	EIF2AK1	chr7	4.40449	5.85859	7.9096	7.38351	7.37473	5.05051
ENSG00000086288	0.495532	1.02626	4.03703	0.254211	0.799332	NA	NME8	chr7	0	0	0.000373	0	0.004195	0
ENSG00000086289	59.3062	1.14142	1.43355	0.796223	0.425902	0.867749	EPDR1	chr7	0	0.032124	0.037629	0.033823	0.122745	0.124023
ENSG00000086300	433.072	-0.687545	0.443953	-1.54869	0.121457	0.576544	SNX10	chr7	0.307678	0.272553	2.90161	0.103273	0.120473	0.156997
ENSG00000086475	3986.42	-0.148416	0.268975	-0.551785	0.581096	0.925356	SEPHS1	chr10	22.8203	22.8763	26.2393	26.7293	19.5676	19.9064
ENSG00000086504	49.6661	0.817689	0.871749	0.937987	0.348251	0.818169	MRPL28	chr16	0.129966	0.224704	0.623416	0.787861	0.569207	0.45615
ENSG00000086506	8.61658	-3.54069	2.41241	-1.4677	0.142187	0.609361	HBQ1	chr16	0.070064	0.711504	0.912326	0	0.088347	0
ENSG00000086544	6.59638	-5.13933	3.22285	-1.59465	0.11079	NA	ITPKC	chr19	0	0.008288	0.208068	0	0.012953	0
ENSG00000086548	0	NA	NA	NA	NA	NA	CEACAM6	chr19	0	0	0	0	0	0
ENSG00000086570	1011.84	0.23595	0.372667	0.633138	0.526644	0.909297	FAT2	chr5	0.956314	0.970839	1.60971	1.67811	1.73312	1.30008
ENSG00000086589	3311.39	0.0856512	0.315495	0.271482	0.786021	0.969527	RBM22	chr5	20.6174	28.5579	17.2316	30.379	22.6794	24.8425
ENSG00000086598	4729.97	0.0597502	0.522685	0.114314	0.908989	0.98712	TMED2	chr12	44.7073	48.5992	11.5547	47.9209	41.7654	40.4982
ENSG00000086619	10334.1	0.0450699	0.37665	0.11966	0.904753	0.98612	ERO1B	chr1	43.4421	54.2796	23.1198	43.3142	48.5363	49.1785
ENSG00000086666	14942.6	0.125135	0.412127	0.303632	0.761408	0.962768	ZFAND6	chr15	97.881	226.043	77.4166	11.6969	83.601	132.887
ENSG00000086696	0	NA	NA	NA	NA	NA	HSD17B2	chr16	0	0.010306	0.001375	0	0	0
ENSG00000086712	9338.3	-0.137096	0.25468	-0.538309	0.590364	0.927789	TXLNG	chrX	40.2303	41.9141	39.4996	40.0555	41.0301	44.19
ENSG00000086717	341.453	-0.421686	0.412651	-1.0219	0.30683	0.787879	PPEF1	chrX	2.27819	2.3491	2.24937	1.19121	2.35485	1.51112
ENSG00000086730	1.94242	-0.0346473	3.8178	-0.00907519	0.992759	NA	LAT2	chr7	0	0.008354	0	0.026837	0	0
ENSG00000086758	1373.86	-0.0842768	0.435471	-0.19353	0.846544	0.977681	HUWE1	chrX	1.45832	2.27458	1.64289	0.9063	1.63137	2.13425
ENSG00000086827	841.512	-0.807074	0.40001	-2.01764	0.0436292	0.382572	ZW10	chr11	8.51327	7.00789	4.35029	4.62944	4.79766	3.4112
ENSG00000086848	187.666	1.01167	0.693252	1.45931	0.144479	0.614827	ALG9	chr11	4.20694	0.888075	0.629598	0.652795	0.765231	0.470616
ENSG00000086967	4.04916	-1.96777	3.67072	-0.536071	0.591909	NA	MYBPC2	chr19	0.064503	0	0	0.002374	0	0.011273
ENSG00000086991	155.364	-0.509067	0.735909	-0.691752	0.489093	0.894397	NOX4	chr11	0.384777	0.332489	0.455633	0.360953	0.075783	0.435816
ENSG00000087008	606.797	1.3263	0.658921	2.01283	0.0441322	0.385075	ACOX3	chr4	1.61811	2.32129	0.795016	1.13528	6.97769	4.63926
ENSG00000087053	921.304	-0.418941	0.385585	-1.08651	0.277255	0.765563	MTMR2	chr11	2.62339	5.3323	2.40333	2.5266	3.54395	3.68725
ENSG00000087074	2296.07	-0.109556	0.517548	-0.211682	0.832355	0.975074	PPP1R15A	chr19	30.0951	16.5401	7.9095	13.6682	22.4029	20.3201
ENSG00000087076	5.16566	2.46123	3.28406	0.749447	0.453588	NA	HSD17B14	chr19	0.066882	0	0	0	0.175247	0.172849
ENSG00000087077	32.0394	7.5712	1.65873	4.56446	5.01e-06	0.00267905	TRIP6	chr7	0	0	0.025861	0.649653	0.221093	0.539578
ENSG00000087085	25.7032	-0.480865	1.47543	-0.325914	0.744489	0.959031	ACHE	chr7	0.340276	0.014989	0.056885	0.165747	0.174123	0.043974
ENSG00000087086	478120	-0.0780287	0.31593	-0.246981	0.804923	0.972204	FTL	chr19	8225.36	13107	9680.89	8843.15	12108	12171.3
ENSG00000087087	531.355	0.819025	0.441865	1.85356	0.0638016	0.449945	SRRT	chr7	1.51082	1.85524	1.30855	2.36476	2.30126	4.57069
ENSG00000087088	39.2018	1.59227	0.999282	1.59342	0.111067	0.555557	BAX	chr19	0.376469	0.42294	0.099272	0.484468	0.816663	0.514486
ENSG00000087095	261.529	0.260437	0.614037	0.42414	0.671464	0.945891	NLK	chr17	0.464968	0.881537	0.866773	0.448661	1.69249	0.749709
ENSG00000087111	160.926	0.196358	0.549673	0.357227	0.720922	0.954305	PIGS	chr17	0.881821	0.800821	0.491133	0.942591	0.688387	0.606337
ENSG00000087116	323.619	-1.10288	0.6914	-1.59513	0.110682	0.555259	ADAMTS2	chr5	0.510244	1.21958	1.29106	1.2656	2.97517	0.308822
ENSG00000087128	1.53734	-4.03859	3.93421	-1.02653	0.30464	NA	TMPRSS11E	chr4	0	0	0.095549	0	0	0
ENSG00000087152	6.05599	-0.0157754	2.7827	-0.0056691	0.995477	NA	ATXN7L3	chr17	0	0.0042	0.158836	0.031854	0	0.073978
ENSG00000087157	260.861	0.254787	0.476909	0.534247	0.593171	0.929484	PGS1	chr17	0.731316	0.515533	0.530748	1.17818	0.688706	0.415968
ENSG00000087191	340.224	0.148378	0.472073	0.314311	0.753285	0.961627	PSMC5	chr17	1.55968	1.94125	1.59247	2.26516	2.01433	1.38692
ENSG00000087206	376.695	0.353925	0.507671	0.697154	0.485706	0.894045	UIMC1	chr5	1.25769	0.578172	1.16416	1.33438	1.45434	1.4628
ENSG00000087237	0	NA	NA	NA	NA	NA	CETP	chr16	0	0	0	0	0	0
ENSG00000087245	0.925185	1.36861	3.94724	0.346725	0.728798	NA	MMP2	chr16	0	0.007198	0	0.005292	0.011269	0.005491
ENSG00000087250	14.1316	-1.32876	1.71603	-0.774319	0.438742	0.874446	MT3	chr16	0.094253	0.903064	0.778541	0.479651	0	0.108411
ENSG00000087253	0.178064	1.08307	4.08047	0.265428	0.79068	NA	LPCAT2	chr16	0	0	0	0	0	0.001702
ENSG00000087258	49.1198	0.868546	0.854271	1.01671	0.309292	0.789651	GNAO1	chr16	0.010563	0.008659	0.198256	0.128563	0.043928	0.013481
ENSG00000087263	7202.9	-0.548635	0.34341	-1.59761	0.11013	0.55454	OGFOD1	chr16	73.9927	42.9956	42.0577	44.2564	39.5921	33.671
ENSG00000087266	68.95	1.27018	0.834802	1.52153	0.128126	0.588997	SH3BP2	chr4	0.012118	0.03072	0.019302	0.026185	0.103518	0.127668
ENSG00000087269	140.144	0.0990396	0.529393	0.187081	0.851597	0.978203	NOP14	chr4	0.719474	0.840975	1.11257	1.36213	0.698008	0.905121
ENSG00000087274	1919.01	0.229537	0.371113	0.618511	0.536239	0.912385	ADD1	chr4	1.86378	3.8689	2.27671	2.45888	2.59648	1.75759
ENSG00000087299	199.597	-0.152571	0.668428	-0.228254	0.819449	0.973714	L2HGDH	chr14	0.476967	0.854293	0.310018	0.113507	0.267829	0.074252
ENSG00000087301	377.022	-0.515923	0.712711	-0.723887	0.469135	0.889307	TXNDC16	chr14	1.94721	2.63386	0.563481	0.45462	1.22431	2.18207
ENSG00000087302	20165.9	0.0614788	0.29888	0.205698	0.837027	0.975622	C14orf166	chr14	77.1183	62.2229	49.1487	59.811	74.3802	78.0883
ENSG00000087303	854.727	-0.0949458	0.714566	-0.132872	0.894295	0.983233	NID2	chr14	8.55992	24.4576	31.2271	11.2155	5.96556	7.44058
ENSG00000087338	4536.94	-0.0328452	0.352756	-0.0931104	0.925816	0.98887	GMCL1	chr2	22.94	14.2214	21.8202	24.1437	25.7841	14.2855
ENSG00000087365	5682.8	0.477456	0.420689	1.13494	0.256401	0.751223	SF3B2	chr11	40.7331	15.3403	18.7854	24.2933	25.0856	25.5103
ENSG00000087448	1192.92	-0.544209	0.364482	-1.4931	0.13541	0.600194	KLHL42	chr12	4.71193	2.12861	5.87816	4.76873	1.54978	2.34894
ENSG00000087460	848.796	0.459231	0.401114	1.14489	0.252255	0.748633	GNAS	chr20	2.89362	4.09386	4.50568	4.29323	4.4497	6.64208
ENSG00000087470	1606.79	-0.10976	0.353106	-0.310841	0.755921	0.962043	DNM1L	chr12	7.39361	4.18558	5.85977	1.82396	7.14131	1.96728
ENSG00000087494	13.598	-1.72385	2.41019	-0.715235	0.474464	0.890763	PTHLH	chr12	0.004784	0.659884	0.00921	0.099011	0.071004	0
ENSG00000087495	9952.84	0.161529	0.488988	0.330333	0.741148	0.958581	PHACTR3	chr20	48.1135	26.2252	20.6161	60.5263	32.7524	43.7793
ENSG00000087502	12332.7	-0.524816	0.27116	-1.93544	0.0529358	0.415656	ERGIC2	chr12	38.1211	59.2866	41.5252	31.7536	27.9323	25.5546
ENSG00000087510	8.61281	2.57947	2.97604	0.866747	0.386081	0.842762	TFAP2C	chr20	0	0.021838	0.035563	0.257791	0	0
ENSG00000087586	82288.5	-0.355354	0.374807	-0.948099	0.343079	0.814045	AURKA	chr20	703.656	970.799	425.394	736.731	475.854	499.315
ENSG00000087589	31.5801	0.204965	1.98918	0.10304	0.917931	0.987912	CASS4	chr20	0.046959	0.275979	0	0.268356	0.164174	0
ENSG00000087842	9.33223	-2.71184	2.14644	-1.26341	0.206441	0.703514	PIR	chrX	0.064711	0.017486	0.00115	0	0.000458	0.004172
ENSG00000087884	5.80227	-0.233936	3.24479	-0.0720961	0.942525	NA	AAMDC	chr11	0	0.021624	0.519406	0.008579	0	0.049766
ENSG00000087903	65.794	0.327973	0.714404	0.459086	0.646172	0.940862	RFX2	chr19	0.047422	0.069345	0.245283	0.022547	0.034024	0.010391
ENSG00000087995	96.8182	0.866733	0.90322	0.959603	0.337255	0.810145	METTL2A	chr17	0.58394	0.197295	0.491435	0.600258	1.46469	0.275718
ENSG00000088002	108.973	-0.824123	0.598082	-1.37794	0.168221	0.652398	SULT2B1	chr19	0.422168	0.873465	0.22877	0.509822	0.185828	0.423463
ENSG00000088035	608.63	0.162789	0.334846	0.48616	0.626853	0.937305	ALG6	chr1	2.18367	2.38319	2.0232	3.17114	2.47531	2.9024
ENSG00000088038	1667.32	-0.591608	0.516157	-1.14618	0.251721	0.748256	CNOT3	chr19	10.487	11.9866	3.25964	4.27133	3.97254	4.52878
ENSG00000088053	0	NA	NA	NA	NA	NA	GP6	chr19	0.006165	0	0	0	0	0
ENSG00000088179	270.635	-0.727423	0.500067	-1.45465	0.145766	0.616927	PTPN4	chr2	1.29797	1.39094	0.871641	0.728643	0.129377	0.324194
ENSG00000088205	1587.7	-0.159625	0.463973	-0.344041	0.730816	0.956496	DDX18	chr2	5.01174	7.20132	11.1926	5.42719	12.6225	6.45172
ENSG00000088247	6154.85	0.394333	0.462328	0.852929	0.393699	0.848311	KHSRP	chr19	35.8569	68.9026	75.2657	35.6843	40.9061	40.0005
ENSG00000088256	3021.63	0.509863	0.457969	1.11331	0.265575	0.756288	GNA11	chr19	3.92036	12.9644	20.3608	8.20077	20.4167	15.1019
ENSG00000088280	39.1028	0.788066	1.54754	0.509239	0.610585	0.932747	ASAP3	chr1	0.188711	0.146164	0	0.041299	0.442679	0.144984
ENSG00000088298	225.007	-0.0356163	0.587792	-0.0605934	0.951683	0.992963	EDEM2	chr20	3.55516	1.52197	1.27311	3.06971	1.74158	2.26469
ENSG00000088305	16140.3	-0.546151	0.331905	-1.6455	0.0998662	0.533143	DNMT3B	chr20	72.7738	74.8613	78.7519	38.7927	66.7873	64.6519
ENSG00000088320	22.1434	0.638085	2.56486	0.24878	0.803531	0.972204	REM1	chr20	0.669367	0	0	0.290598	0	1.24734
ENSG00000088325	8250.62	-0.339355	0.325329	-1.04312	0.296895	0.778359	TPX2	chr20	57.6717	51.3462	34.7621	41.6429	39.9036	45.4801
ENSG00000088340	158.75	-0.242537	0.962145	-0.25208	0.800979	0.972085	FER1L4	chr20	0.975997	0.113512	0.131987	0.321064	0.013135	0.15227
ENSG00000088356	1112.86	0.335748	0.47742	0.703255	0.481897	0.892813	PDRG1	chr20	12.5088	8.76303	9.84389	24.3605	8.46563	11.8856
ENSG00000088367	217.806	-0.337135	0.705959	-0.477556	0.632966	0.937305	EPB41L1	chr20	0.051497	0.049376	0.242294	0.053575	0.011289	0.615626
ENSG00000088386	23.8012	2.65708	1.62504	1.63509	0.102031	0.537855	SLC15A1	chr13	0.019893	0	0.05361	0.45719	0.056795	0.09645
ENSG00000088387	1287.32	-0.811769	0.367862	-2.20672	0.0273337	0.316785	DOCK9	chr13	2.727	1.5434	1.97541	1.71098	1.70029	1.04361
ENSG00000088448	11612	0.0907893	0.269711	0.336617	0.736406	0.957669	ANKRD10	chr13	49.306	41.0969	30.3487	31.0937	34.4015	34.5813
ENSG00000088451	10.3534	1.00508	2.51764	0.399216	0.689734	0.948897	TGDS	chr13	0	0.05411	0.124794	0.338472	0.01146	0
ENSG00000088538	47.8189	-0.0988967	0.915636	-0.108009	0.913989	0.987912	DOCK3	chr3	0.048897	0.06425	0.197444	0.098294	0.144901	0.089055
ENSG00000088543	0.478367	-0.759168	4.04114	-0.18786	0.850987	NA	C3orf18	chr3	0	0	0.020988	0	0.013499	0
ENSG00000088682	557.71	0.24039	0.437166	0.549883	0.5824	0.925356	COQ9	chr16	7.55868	3.87993	5.15977	14.3959	6.73426	1.44261
ENSG00000088726	0.362367	0.1213	4.08047	0.0297269	0.976285	NA	TMEM40	chr3	0.002526	0	0	0.002702	0	0
ENSG00000088727	197.665	-0.939708	0.654939	-1.4348	0.151344	0.626344	KIF9	chr3	0.681218	1.8713	0.761533	0.753801	1.40299	0.82942
ENSG00000088756	2.61849	-3.75262	3.92397	-0.956333	0.338904	NA	ARHGAP28	chr18	0	0.00265	0.000629	0	0.000414	0
ENSG00000088766	13171	-0.431493	0.367523	-1.17406	0.240372	0.737437	CRLS1	chr20	30.4395	65.4957	36.4104	24.4335	60.1273	65.693
ENSG00000088782	0	NA	NA	NA	NA	NA	DEFB127	chr20	0	0	0	0	0	0
ENSG00000088808	1374.09	0.631254	0.338481	1.86496	0.0621872	0.446088	PPP1R13B	chr14	2.612	2.96495	4.98579	3.46402	4.8034	4.69546
ENSG00000088812	296.127	-1.18029	0.598173	-1.97316	0.0484778	0.400603	ATRN	chr20	0.471381	1.09498	1.07521	0.698932	0.433568	0.190392
ENSG00000088826	31.365	0.445653	1.10935	0.401724	0.687887	0.948515	SMOX	chr20	0.027923	0.009377	0.013501	0.045293	0.009556	0.022909
ENSG00000088827	0	NA	NA	NA	NA	NA	SIGLEC1	chr20	0	0	0	0	0	0
ENSG00000088832	26357.1	-0.209178	0.333212	-0.627761	0.53016	0.910494	FKBP1A	chr20	311.777	253.205	215.348	317.239	272.411	304.269
ENSG00000088833	3561.28	0.00710336	0.372448	0.0190721	0.984784	0.998304	NSFL1C	chr20	21.0614	12.4117	13.2182	22.6882	16.8405	14.3551
ENSG00000088836	709.63	1.20966	0.453759	2.66587	0.00767892	0.175941	SLC4A11	chr20	1.38015	2.63603	1.48239	3.01545	5.32819	5.85132
ENSG00000088854	4348.1	0.174309	0.331998	0.52503	0.599562	0.931058	C20orf194	chr20	9.8214	7.09698	9.31982	8.96123	14.2417	10.6732
ENSG00000088876	74.7251	-0.142816	0.820981	-0.173958	0.861899	0.979848	ZNF343	chr20	0.339394	0.353832	0.392742	0.274231	0.618754	0.144025
ENSG00000088881	1.07614	-3.5246	3.94587	-0.893237	0.37173	NA	EBF4	chr20	0	0	0.041418	0	0	0
ENSG00000088882	46.3623	1.7788	2.05915	0.863853	0.387669	0.844094	CPXM1	chr20	0	0.492113	0.013875	0.375275	0	1.46504
ENSG00000088888	117.675	1.19407	0.986241	1.21073	0.225999	0.724012	MAVS	chr20	0.076303	0.009518	0.266542	0.239684	0.270379	0.336689
ENSG00000088899	7.65733	2.60883	3.13138	0.833126	0.404774	NA	LZTS3	chr20	0	0	0.02384	0	0.006123	0.142668
ENSG00000088926	25.0808	0.394659	1.15017	0.343132	0.731499	0.956549	F11	chr4	0.356857	0.296847	0.02273	0.17545	0.38892	0.151621
ENSG00000088930	15312.3	-0.181335	0.30816	-0.588442	0.556235	0.918998	XRN2	chr20	90.5163	67.7281	102.224	101.865	82.2017	77.9986
ENSG00000088970	155.349	-0.174141	0.652849	-0.26674	0.789669	0.97012	KIZ	chr20	0.141646	0.401722	0.268315	0.174864	0.228517	0.300232
ENSG00000088986	121.265	0.450706	0.640449	0.703734	0.481598	0.892786	DYNLL1	chr12	0.889509	1.93324	3.29224	2.65498	3.29	3.72282
ENSG00000088992	815.267	0.495549	0.335086	1.47887	0.139175	0.604926	TESC	chr12	9.7763	6.18821	9.53423	12.3784	19.6518	7.89858
ENSG00000089006	7682.01	-0.126032	0.282671	-0.445862	0.655697	0.943379	SNX5	chr20	25.8171	64.0501	41.8028	57.6554	69.3264	31.0346
ENSG00000089009	5916.31	0.0785206	0.330202	0.237796	0.81204	0.972227	RPL6	chr12	74.8597	73.0111	129.679	88.8063	126.156	92.7134
ENSG00000089012	0.170899	1.08307	4.08047	0.265428	0.79068	NA	SIRPG	chr20	0	0	0	0	0.014863	0
ENSG00000089022	1683.73	0.300338	0.304207	0.987281	0.323505	0.801041	MAPKAPK5	chr12	3.0628	3.27486	7.73084	5.872	5.65484	3.616
ENSG00000089041	23.7276	3.27794	2.51707	1.30228	NA	NA	P2RX7	chr12	0	0	0	0.496897	0	0
ENSG00000089048	10913.5	-0.686774	0.291185	-2.35855	0.0183464	0.261581	ESF1	chr20	78.9806	93.2942	74.27	43.3168	64.3123	60.966
ENSG00000089050	36.7713	0.283499	1.93903	0.146207	0.883758	0.982269	RBBP9	chr20	0	0.421206	0.07857	0.241586	0	0.398627
ENSG00000089053	572.758	0.325888	0.430267	0.757409	0.448805	0.880357	ANAPC5	chr12	0.794769	2.93538	1.00068	3.79472	1.21673	0.647324
ENSG00000089057	143.322	1.83309	0.67503	2.71557	0.00661626	0.163976	SLC23A2	chr20	0.01864	0.212117	0.172943	0.819671	0.550657	0.472939
ENSG00000089060	8.42063	0.148828	2.12785	0.0699431	0.944239	0.991194	SLC8B1	chr12	0.009156	0.005093	0.00185	0.008998	0	0.010704
ENSG00000089063	9391.83	-0.443727	0.281445	-1.5766	0.114887	0.564302	TMEM230	chr20	114.499	158.985	119.114	111.06	16.1217	116.019
ENSG00000089091	787.407	0.0441784	0.44629	0.0989903	0.921146	0.987912	DZANK1	chr20	2.38686	2.62476	1.36067	1.93464	2.17333	3.40081
ENSG00000089094	102.057	0.78854	0.911896	0.864725	0.38719	0.843904	KDM2B	chr12	0.013543	0.162373	0.141172	0.245185	0.124914	0.063218
ENSG00000089101	357.224	-0.00865337	0.73689	-0.0117431	0.990631	0.999151	CFAP61	chr20	3.52475	1.19613	0.949717	2.63962	1.01183	0.032208
ENSG00000089116	0	NA	NA	NA	NA	NA	LHX5	chr12	0	0	0	0	0	0
ENSG00000089123	1929.77	-0.0716116	0.291005	-0.246084	0.805617	0.972204	TASP1	chr20	13.8328	8.27945	9.33813	14.1521	8.6372	16.2932
ENSG00000089127	16.0055	-6.53733	3.07051	-2.12907	NA	NA	OAS1	chr12	0	0	1.94038	0	0.004705	0
ENSG00000089154	1677.69	0.407649	0.421397	0.967376	0.333356	0.807166	GCN1	chr12	3.43206	2.29463	3.6665	4.84738	6.39351	2.60898
ENSG00000089157	35595.4	0.0514878	0.274614	0.187491	0.851275	0.978203	RPLP0	chr12	174.814	209.971	163.615	309.35	312.929	276.855
ENSG00000089159	1593.25	0.123362	0.431203	0.286088	0.774811	0.967068	PXN	chr12	5.88698	2.94309	15.8325	5.035	5.15769	5.52006
ENSG00000089163	59.7388	0.622163	1.26406	0.492196	0.622581	0.936164	SIRT4	chr12	1.50835	0.642534	0.025104	1.144	0.538208	2.10857
ENSG00000089169	3475.25	-0.242528	0.34473	-0.703531	0.481725	0.892805	RPH3A	chr12	1.92618	3.67618	2.92292	1.70002	2.36736	3.27459
ENSG00000089177	487.293	-0.295324	0.515664	-0.572707	0.566843	0.922331	KIF16B	chr20	1.70764	0.951794	0.585039	1.3368	0.892506	0.820702
ENSG00000089195	1535.99	-0.507397	0.418525	-1.21235	0.225379	0.723826	TRMT6	chr20	15.6283	7.54036	12.222	14.0146	10.1769	7.96917
ENSG00000089199	89.5614	1.7181	2.80149	0.613281	0.539691	0.912606	CHGB	chr20	0.124617	0	0.388527	2.39942	0	0.542263
ENSG00000089220	10530.8	0.500756	0.312069	1.60464	0.108574	0.551163	PEBP1	chr12	117.032	95.1873	71.0405	156.803	153.566	149.612
ENSG00000089225	2375.5	0.218513	0.528056	0.413807	0.679015	0.946733	TBX5	chr12	8.03897	12.2902	7.69116	18.3499	4.25014	14.1129
ENSG00000089234	2200.15	-0.901627	0.363969	-2.47721	0.0132414	0.226484	BRAP	chr12	14.6934	14.93	9.02003	8.17898	7.24439	5.11612
ENSG00000089248	2304.81	0.543568	0.643607	0.844565	0.398354	0.851804	ERP29	chr12	37.7756	5.72028	5.78048	18.6582	30.0735	21.1324
ENSG00000089250	0.341798	1.98803	4.03703	0.492449	0.622402	NA	NOS1	chr12	0	0	0	0	0.001527	0
ENSG00000089280	387.037	0.019312	0.594158	0.0325031	0.974071	0.996639	FUS	chr16	5.28973	0.462885	1.19126	1.00961	1.76567	1.11319
ENSG00000089289	1038.33	0.151909	0.324221	0.468534	0.639402	0.938228	IGBP1	chrX	15.2471	12.15	18.2032	20.7081	21.8316	15.8352
ENSG00000089327	0.293278	0.1213	4.08047	0.0297269	0.976285	NA	FXYD5	chr19	0	0.009342	0	0	0.014552	0
ENSG00000089335	469.851	0.0539259	0.646757	0.0833789	0.93355	0.989816	ZNF302	chr19	2.12301	4.45959	2.17016	1.08585	4.7511	3.7904
ENSG00000089351	714.723	0.3966	0.342526	1.15787	0.246918	0.742639	GRAMD1A	chr19	3.11178	0.907345	1.00517	1.56099	1.35066	2.35605
ENSG00000089356	2.63065	-3.75434	3.92395	-0.956776	0.33868	NA	FXYD3	chr19	0	0	0.105039	0	0.053902	0
ENSG00000089472	0	NA	NA	NA	NA	NA	HEPH	chrX	0	0	0	0	0	0
ENSG00000089486	231.339	-0.790629	0.898798	-0.879652	0.379048	0.838691	CDIP1	chr16	11.9577	3.93098	6.60701	10.5253	1.33605	8.79196
ENSG00000089505	0.153734	-0.840481	4.08047	-0.205976	0.836809	NA	CMTM1	chr16	0	0	0.002972	0	0	0
ENSG00000089558	0	NA	NA	NA	NA	NA	KCNH4	chr17	0	0	0	0	0	0
ENSG00000089597	267.541	-0.555108	0.639497	-0.868038	0.385374	0.842207	GANAB	chr11	1.70972	1.22273	0.671279	0.380757	3.81608	4.32946
ENSG00000089639	0.820165	0.73112	3.95387	0.184912	0.853298	NA	GMIP	chr19	0	0	0.018197	0	0.005823	0
ENSG00000089682	1329.78	-0.188677	0.636477	-0.296439	0.766895	0.963717	RBM41	chrX	7.14891	6.31089	6.49679	7.92804	0.972455	4.07411
ENSG00000089685	1241.86	-0.608751	0.402841	-1.51115	0.130751	0.592398	BIRC5	chr17	7.14031	12.6512	8.51091	12.0353	6.1808	4.84374
ENSG00000089692	0	NA	NA	NA	NA	NA	LAG3	chr12	0	0	0	0	0	0
ENSG00000089693	1689.64	0.247814	0.488059	0.507754	0.611626	0.932905	MLF2	chr12	8.79066	23.8016	9.43316	11.7817	8.69696	18.8015
ENSG00000089723	0.153734	-0.840481	4.08047	-0.205976	0.836809	NA	OTUB2	chr14	0	0	0.03023	0	0	0
ENSG00000089737	2883.13	0.289576	0.400555	0.722936	0.469719	0.889455	DDX24	chr14	4.0257	9.88035	12.2061	14.551	17.0317	10.4955
ENSG00000089775	43.8496	1.97333	1.53473	1.28578	0.19852	0.692797	ZBTB25	chr14	0.032554	0.081806	0.05753	0.223505	0.149655	0
ENSG00000089818	1226.69	-0.315675	0.587401	-0.537409	0.590985	0.927886	NECAP1	chr12	2.11254	7.20769	2.88598	2.9778	1.55033	0.782098
ENSG00000089820	0.307468	-1.72095	4.04114	-0.425857	0.670212	NA	ARHGAP4	chrX	0.23824	0.332656	0.268687	1.01572	0.513066	0.733833
ENSG00000089847	41.5454	1.44813	1.76483	0.820547	0.411905	0.860332	ANKRD24	chr19	0.157131	0	0.032438	0.147704	0.002815	0.373721
ENSG00000089876	664.374	0.0138292	0.46866	0.029508	0.976459	0.996639	DHX32	chr10	5.94394	5.59218	5.69812	4.23806	11.3029	3.10616
ENSG00000089902	6059.13	0.259097	0.513705	0.50437	0.614001	0.93368	RCOR1	chr14	5.36528	21.9574	24.0661	17.3955	25.3153	23.9106
ENSG00000089916	1057.25	0.127252	0.297243	0.428107	0.668573	0.945891	GPATCH2L	chr14	3.34613	0.785759	1.09853	1.03407	1.09194	0.916212
ENSG00000090006	402.675	0.644336	0.572264	1.12594	0.260191	0.753092	LTBP4	chr19	4.02613	1.25618	1.13493	2.38524	7.31408	1.77254
ENSG00000090013	4.71116	-0.316244	3.53872	-0.0893668	0.92879	NA	BLVRB	chr19	0	0	0.33372	0.148664	0.026246	0
ENSG00000090020	1837.49	0.0244331	0.448129	0.0545225	0.956519	0.994154	SLC9A1	chr1	12.973	5.6911	6.17548	7.86887	25.5521	13.9972
ENSG00000090054	6754.02	1.32e-05	0.385455	3.43e-05	0.999973	0.999973	SPTLC1	chr9	64.1027	38.4701	24.3935	115.43	57.6577	40.5125
ENSG00000090060	1472.72	-0.0759491	0.414252	-0.183341	0.854531	0.978386	PAPOLA	chr14	9.12346	15.0246	6.08263	4.05943	4.47731	9.85959
ENSG00000090061	80.997	-1.17874	0.854654	-1.37921	0.167831	0.65203	CCNK	chr14	4.2589	3.27806	3.29327	4.66972	4.27953	3.52905
ENSG00000090097	9.57142	0.776019	2.26771	0.342204	0.732197	0.956753	PCBP4	chr3	0.034982	0.048881	0.005874	0	0.008481	0.166944
ENSG00000090104	0.170899	1.08307	4.08047	0.265428	0.79068	NA	RGS1	chr1	0	0	0	0	0.010153	0
ENSG00000090238	105.301	1.42329	0.881009	1.61552	0.106197	0.547699	YPEL3	chr16	0.363439	0.590666	1.91958	0.556235	2.90116	0.578385
ENSG00000090263	425.107	-0.282248	0.553775	-0.509679	0.610276	0.932631	MRPS33	chr7	1.77874	3.73643	4.80571	1.99494	10.6659	2.591
ENSG00000090266	131.008	-0.189144	0.585079	-0.32328	0.746483	0.959031	NDUFB2	chr7	4.51351	3.1514	4.47659	7.25121	5.17116	8.97228
ENSG00000090273	3465.96	0.725083	0.32989	2.19795	0.0279525	0.319667	NUDC	chr1	28.586	31.4166	17.698	53.8912	42.8061	46.9256
ENSG00000090316	1020.29	1.18128	0.351721	3.35857	0.000783458	0.0506366	MAEA	chr4	4.18677	2.66809	3.05083	2.54427	7.35177	4.53001
ENSG00000090339	407.923	-0.664415	0.73497	-0.904003	0.365994	0.831278	ICAM1	chr19	6.40184	4.09835	2.09103	5.8599	4.52423	2.7662
ENSG00000090372	461.643	1.25877	0.527791	2.38498	0.0170802	0.254429	STRN4	chr19	0.422256	1.38382	0.423999	1.42165	0.599179	1.67504
ENSG00000090376	5.78734	4.14925	3.24604	1.27825	0.201161	NA	IRAK3	chr12	0	0	0.004747	0.065747	0.003097	0
ENSG00000090382	0.642259	2.90501	3.97629	0.730582	0.465034	NA	LYZ	chr12	0	0.44315	0	0.16363	0	0.448708
ENSG00000090402	0	NA	NA	NA	NA	NA	SI	chr3	0	0	0	0	0	0
ENSG00000090432	445.62	0.250528	0.53528	0.468031	0.639763	0.938428	MUL1	chr1	4.52456	2.0256	2.59091	6.50989	3.59383	2.504
ENSG00000090447	614.364	0.660486	0.859539	0.768419	NA	NA	TFAP4	chr16	0.183328	2.16901	0.21088	2.17173	1.45074	2.38099
ENSG00000090470	1037.69	0.703194	0.375892	1.87073	0.061382	0.443286	PDCD7	chr15	3.08203	4.3286	5.89191	9.25751	9.37706	7.14328
ENSG00000090487	5162.42	0.011528	0.384486	0.0299827	0.976081	0.996639	SPG21	chr15	34.6658	51.1546	40.0642	38.1359	34.1354	20.6544
ENSG00000090512	0	NA	NA	NA	NA	NA	FETUB	chr3	0	0	0	0	0	0
ENSG00000090520	242.708	0.0966033	0.493792	0.195636	0.844895	0.977681	DNAJB11	chr3	1.29872	1.62354	3.3147	2.02604	1.28698	3.06629
ENSG00000090530	1017.07	-0.558554	0.433484	-1.28852	0.197564	0.691339	P3H2	chr3	5.86398	10.0574	2.08456	5.92996	4.33116	2.22283
ENSG00000090534	0	NA	NA	NA	NA	NA	THPO	chr3	0	0	0	0	0	0
ENSG00000090539	0	NA	NA	NA	NA	NA	CHRD	chr3	0	0	0	0	0	0
ENSG00000090554	0	NA	NA	NA	NA	NA	FLT3LG	chr19	0.089107	0	0.022835	0.103112	0	0.057899
ENSG00000090565	6.72823	1.45555	2.07596	0.701147	0.483211	NA	RAB11FIP3	chr16	0.001553	0.020489	0.067113	0.012578	0.016537	0.016054
ENSG00000090581	73.6381	0.63977	0.666068	0.960518	0.336795	0.809637	GNPTG	chr16	3.60169	5.86474	1.40717	1.58574	28.3728	41.1591
ENSG00000090612	399.479	0.511807	0.519279	0.985609	0.324325	0.801584	ZNF268	chr12	0.336306	0.592357	0.712867	1.14428	0.614083	0.406241
ENSG00000090615	6409.67	-0.104879	0.348889	-0.30061	0.763712	0.962768	GOLGA3	chr12	12.2216	10.6779	15.5312	9.19738	17.187	12.1752
ENSG00000090621	19544.1	0.0232131	0.344236	0.0674338	0.946236	0.991592	PABPC4	chr1	98.1561	142.463	181.866	131.621	244.907	179.041
ENSG00000090659	0	NA	NA	NA	NA	NA	CD209	chr19	0	0	0	0	0	0
ENSG00000090661	130.104	0.542824	0.674467	0.804819	0.420924	0.864765	CERS4	chr19	1.53008	0.460738	0.240757	0.122977	1.64601	0.267395
ENSG00000090674	1450.46	-0.178704	0.486355	-0.367434	0.713295	0.953669	MCOLN1	chr19	22.6408	8.19155	8.61109	9.59529	9.5613	10.8055
ENSG00000090686	2739.35	0.167752	0.347436	0.482828	0.629218	0.937305	USP48	chr1	4.87991	3.47567	2.89635	4.24557	5.63331	5.60143
ENSG00000090776	107.305	0.86015	1.38741	0.619969	0.535278	0.912318	EFNB1	chrX	0.600212	0.100799	0.542234	0.853968	1.8072	0
ENSG00000090857	1408.91	-0.229521	0.458381	-0.500721	0.616567	0.934535	PDPR	chr16	3.26274	7.62581	6.88479	3.68284	8.51407	4.80473
ENSG00000090861	831.607	0.502058	0.427716	1.17381	0.24047	0.737529	AARS	chr16	2.8057	2.57347	4.45484	4.73552	3.13701	6.29917
ENSG00000090863	4388.66	-1.02735	0.284368	-3.61274	0.000302977	0.0288444	GLG1	chr16	12.5368	9.07097	13.5902	6.90341	8.02783	4.3618
ENSG00000090889	19125.2	-0.216965	0.271323	-0.799656	0.42391	0.866317	KIF4A	chrX	95.5314	85.1434	78.0703	84.225	74.3675	89.2922
ENSG00000090905	15422	0.0278943	0.391358	0.0712756	0.943178	0.990963	TNRC6A	chr16	46.8771	54.0655	64.436	45.4826	17.1583	12.6893
ENSG00000090924	11.2015	3.62356	2.35568	1.53822	0.123994	0.581412	PLEKHG2	chr19	0	0.008606	0.010738	0.013353	0.132482	0
ENSG00000090932	248.058	1.42255	0.56426	2.5211	0.011699	0.214132	DLL3	chr19	0.420687	1.20552	1.13769	3.89427	2.53038	2.17931
ENSG00000090971	135.193	0.701899	0.640241	1.0963	0.272946	0.761733	NAT14	chr19	1.63347	0.863742	0.640288	1.58856	2.03763	1.61993
ENSG00000090975	0.324633	0.1213	4.08047	0.0297269	0.976285	NA	PITPNM2	chr12	0	0	0.001663	0	0.001681	0
ENSG00000090989	1005.58	-0.867367	0.415312	-2.08847	0.0367555	0.359077	EXOC1	chr4	7.12781	4.06945	3.89649	4.63148	2.51951	2.94116
ENSG00000091009	1664.04	-0.219988	0.435844	-0.50474	0.613741	0.93368	RBM27	chr5	25.1864	28.1153	26.0055	18.8761	26.9645	22.3953
ENSG00000091010	0	NA	NA	NA	NA	NA	POU4F3	chr5	0	0	0	0	0	0
ENSG00000091039	5006.06	-0.13837	0.28883	-0.479073	0.631887	0.937305	OSBPL8	chr12	10.6958	11.251	12.9344	10.7141	13.3808	14.3811
ENSG00000091073	6719.78	0.0773383	0.44596	0.17342	0.862321	0.979848	DTX2	chr7	110.207	50.212	58.2734	84.5904	103.297	73.827
ENSG00000091106	0	NA	NA	NA	NA	NA	NLRC4	chr2	0	0	0	0	0	0
ENSG00000091127	1015.65	-0.886395	0.685748	-1.2926	0.196151	0.691153	PUS7	chr7	11.3143	2.18331	4.34057	5.53656	1.75231	0.78963
ENSG00000091128	178.779	-0.32624	0.635335	-0.513493	0.607606	0.931914	LAMB4	chr7	0.306848	0.470695	0.303075	0.57059	0.154804	0.117251
ENSG00000091129	410.449	0.539858	0.412472	1.30884	0.19059	0.685245	NRCAM	chr7	0.538388	0.464461	0.84108	1.02508	0.878819	1.16359
ENSG00000091136	20129.8	-0.308331	0.32311	-0.954261	0.339952	0.81313	LAMB1	chr7	64.2686	25.4928	28.8662	50.0496	28.6092	29.5558
ENSG00000091137	2.04478	-2.37438	3.88977	-0.610416	0.541586	NA	SLC26A4	chr7	0	0.027692	0	0.005039	0.002678	0
ENSG00000091138	0	NA	NA	NA	NA	NA	SLC26A3	chr7	0	0	0	0	0	0
ENSG00000091140	3691.18	-0.239019	0.26351	-0.907059	0.364376	0.830326	DLD	chr7	17.6819	10.6874	14.3296	11.8985	10.9566	9.07355
ENSG00000091157	3201.94	-0.648579	0.294074	-2.2055	0.0274191	0.317082	WDR7	chr18	2.97464	3.78922	5.28715	1.48337	3.10721	1.05165
ENSG00000091164	626.019	0.118587	0.418248	0.283532	0.776769	0.967459	TXNL1	chr18	0.79253	1.88531	1.40568	3.79258	2.64229	2.72502
ENSG00000091181	52.4823	0.844545	0.910554	0.927507	0.353663	0.822052	IL5RA	chr3	0.104829	0.080903	0.046579	0.151372	0.321351	0.094563
ENSG00000091262	309.44	-0.166762	0.559471	-0.298072	0.765649	0.963581	ABCC6	chr16	0.458205	0.518434	1.3588	0.610763	1.00028	0.483387
ENSG00000091317	20312.3	0.0125272	0.450899	0.0277827	0.977835	0.996639	CMTM6	chr3	155.925	78.0759	80.4987	153.613	125.71	67.6153
ENSG00000091409	740.476	0.622445	0.554669	1.12219	0.261781	0.754634	ITGA6	chr2	0.355897	0.312054	0.322322	0.183436	0.751554	0.518111
ENSG00000091428	71.9398	0.802055	1.61784	0.495758	0.620065	0.934959	RAPGEF4	chr2	0.000203	0.330326	0.001247	0.148084	0.001415	0.246171
ENSG00000091436	1675	0.0563654	0.277271	0.203286	0.838911	0.976094	MAP3K20	chr2	5.51322	7.57007	5.23992	10.6567	6.11626	5.56899
ENSG00000091482	0.201802	-0.840481	4.08047	-0.205976	0.836809	NA	SMPX	chrX	0	0	0	0	0	0
ENSG00000091483	951.775	-0.521324	0.472709	-1.10284	0.270095	0.759731	FH	chr1	8.41412	17.248	5.23822	8.9572	7.82015	6.76608
ENSG00000091490	4.83757	-1.21461	3.50697	-0.346341	0.729086	NA	SEL1L3	chr4	0	0	0.082286	0.044369	0.002028	0
ENSG00000091513	6.86128	-6.19245	3.91295	-1.58255	0.113524	NA	TF	chr3	0.1876	0	0	0	0	0
ENSG00000091527	3074.27	0.320064	0.482873	0.662832	0.507438	0.899603	CDV3	chr3	5.03064	18.9317	12.634	12.7531	18.9113	14.3676
ENSG00000091536	62.128	1.28089	1.35525	0.945133	0.344591	0.815116	MYO15A	chr17	0.075317	0.041947	0.001513	0.008572	0.06986	0.193372
ENSG00000091542	11273.5	0.484615	0.30376	1.59539	0.110625	0.555259	ALKBH5	chr17	69.4069	69.3399	54.259	105.261	80.9082	50.74
ENSG00000091583	0.153734	-0.840481	4.08047	-0.205976	0.836809	NA	APOH	chr17	0	0	0.01706	0	0	0
ENSG00000091592	363.556	-0.325114	0.671602	-0.484088	0.628323	0.937305	NLRP1	chr17	0.473439	0.309028	0.621808	0.723801	0.112687	0.661097
ENSG00000091622	79.7546	-0.689806	1.36286	-0.506146	0.612754	0.933174	PITPNM3	chr17	0.254973	0.051773	0.21735	0.218253	0	0.121215
ENSG00000091640	899.641	0.385513	0.445646	0.865064	0.387003	0.843881	SPAG7	chr17	13.587	9.56258	4.47714	7.83355	14.0882	21.0035
ENSG00000091651	8114.77	-0.402514	0.272478	-1.47723	0.139613	0.605775	ORC6	chr16	90.61	90.9415	87.925	73.6598	77.1392	92.0498
ENSG00000091656	0.93957	-2.07811	3.96135	-0.524598	0.599863	NA	ZFHX4	chr8	0	0	0.05048	0	0.001164	0
ENSG00000091664	0	NA	NA	NA	NA	NA	SLC17A6	chr11	0	0	0	0	0	0
ENSG00000091704	1085.32	-0.30264	0.533581	-0.567187	0.570587	0.923471	CPA1	chr7	17.5004	7.28444	6.34525	11.6049	16.1096	3.81419
ENSG00000091732	748.249	-0.171588	0.450016	-0.381294	0.702985	0.952709	ZC3HC1	chr7	12.8166	6.7626	8.96412	12.6992	5.71331	10.2907
ENSG00000091831	36.5151	0.801126	1.74847	0.458187	0.646818	0.940977	ESR1	chr6	0.030319	0.000826	0.008078	0	0.048603	0.018889
ENSG00000091844	3.87319	-5.37379	3.91767	-1.37168	0.170163	NA	RGS17	chr6	0.000416	0.05414	0	0	0	0
ENSG00000091879	55.0258	0.776992	1.26247	0.615455	0.538255	0.912385	ANGPT2	chr8	0.113539	0.057905	0.130387	0.042564	0	0.479384
ENSG00000091947	63.0236	-0.555435	0.920448	-0.60344	0.546216	0.914226	TMEM101	chr17	0.197666	0.301594	1.2809	0.210108	0.377097	0.721834
ENSG00000091972	26.4069	8.26076	2.42393	3.40801	0.000654389	0.0447231	CD200	chr3	0	0	0	0.160526	0	0.195521
ENSG00000091986	25.7117	-1.45745	2.01073	-0.724834	0.468554	0.889307	CCDC80	chr3	0	0.118091	0.065527	0.056717	0	0.181094
ENSG00000092009	0	NA	NA	NA	NA	NA	CMA1	chr14	0	0	0	0	0	0
ENSG00000092010	1428.78	0.427926	0.282523	1.51466	0.129859	0.591692	PSME1	chr14	21.2387	22.6188	13.7124	29.9659	19.902	21.5506
ENSG00000092020	196	0.00323053	0.589303	0.00548196	0.995626	0.999543	PPP2R3C	chr14	3.55039	7.233	8.29842	8.67651	6.14917	8.84235
ENSG00000092036	8132.5	-0.0556944	0.437864	-0.127196	0.898785	0.984405	HAUS4	chr14	205.344	99.7895	93.5394	141.002	91.4274	137.759
ENSG00000092051	0.890318	3.36661	3.95737	0.850717	0.394927	NA	JPH4	chr14	0	0	0	0	0	0.024168
ENSG00000092054	423.743	2.11324	0.983664	2.14833	0.0316874	0.335722	MYH7	chr14	0.129973	0.00739	0.410416	1.86476	0.174126	1.83655
ENSG00000092067	0	NA	NA	NA	NA	NA	CEBPE	chr14	0	0	0	0	0	0
ENSG00000092068	15198.7	-0.0231989	0.351934	-0.0659183	0.947443	0.991723	SLC7A8	chr14	90.218	57.0254	76.691	64.415	94.1684	74.1886
ENSG00000092094	14.5892	0.186674	1.90955	0.0977585	0.922124	0.98794	OSGEP	chr14	0	0.17192	0.121347	0.016652	0.310085	0.267696
ENSG00000092096	22.4729	-0.564243	1.98395	-0.284404	0.7761	0.967459	SLC22A17	chr14	0.458472	0.012578	0.158547	0.009058	0	0.583418
ENSG00000092098	22.3924	2.13809	1.76904	1.20862	0.22681	0.724227	RNF31	chr14	0.343733	0.281047	0.353497	0.18214	0.753361	0.338734
ENSG00000092108	8360.28	-0.31196	0.27726	-1.12515	0.260524	0.753092	SCFD1	chr14	30.6668	33.6988	13.161	9.298	7.68093	6.07736
ENSG00000092140	527.385	-0.139523	0.433558	-0.32181	0.747597	0.95944	G2E3	chr14	0.346333	0.30232	1.51866	0.491483	0.46218	0.190092
ENSG00000092148	2132.59	0.156769	0.380515	0.411991	0.680346	0.94725	HECTD1	chr14	2.18706	3.34032	6.46832	3.09489	4.90353	2.70235
ENSG00000092199	11875.6	0.305411	0.264688	1.15385	0.248561	0.744423	HNRNPC	chr14	34.6853	52.3609	51.6011	68.2497	63.9421	33.9895
ENSG00000092200	12.3628	0.639306	3.35036	0.190817	0.848669	0.977681	RPGRIP1	chr14	0.068324	0	0	0	0.126089	0
ENSG00000092201	2689.15	-0.593536	0.471891	-1.25778	0.208471	0.703923	SUPT16H	chr14	9.23353	12.0162	4.31805	7.76068	5.1048	7.11078
ENSG00000092203	4497.3	0.392238	0.329615	1.18999	0.234051	0.730598	TOX4	chr14	12.8126	13.6553	18.1357	36.1129	23.726	31.2353
ENSG00000092208	370.899	0.529409	0.458516	1.15461	0.248249	0.744045	GEMIN2	chr14	2.40264	5.63997	2.69165	5.80863	4.88064	5.42733
ENSG00000092295	0.512696	2.57336	3.99406	0.644297	0.519383	NA	TGM1	chr14	0	0	0	0	0.018978	0
ENSG00000092330	1001.15	0.524182	0.450268	1.16416	0.244361	0.739768	TINF2	chr14	8.76277	3.5186	7.48332	12.1257	10.8897	8.20897
ENSG00000092345	11928	-0.30688	0.449745	-0.682343	0.495022	0.895893	DAZL	chr3	73.141	52.9198	112.748	115.611	50.6128	51.8043
ENSG00000092377	0.170899	1.08307	4.08047	0.265428	0.79068	NA	TBL1Y	chrY	0	0	0	0	0.000653	0
ENSG00000092421	43.2861	-0.433492	1.58853	-0.272889	0.784939	0.969435	SEMA6A	chr5	0.100084	0.375207	0.030281	0.146904	0	0.003735
ENSG00000092439	1284.81	-0.747451	0.405264	-1.84436	0.0651313	0.451344	TRPM7	chr15	1.36228	1.37363	1.72703	1.35823	1.17705	0.53568
ENSG00000092445	12.6659	-0.4091	1.76764	-0.231438	0.816975	0.973037	TYRO3	chr15	0.009778	0.027127	0.027764	0.17063	0.024186	0
ENSG00000092470	5868.26	-0.0940643	0.376399	-0.249906	0.80266	0.972204	WDR76	chr15	25.6951	34.9416	28.0459	24.3014	40.7118	20.9519
ENSG00000092529	0	NA	NA	NA	NA	NA	CAPN3	chr15	0.178938	0.544255	0.345471	0.325388	0.065598	0.13588
ENSG00000092531	1047.8	-0.533608	0.433766	-1.23017	0.218632	0.716358	SNAP23	chr15	10.7414	3.24976	5.12899	1.9596	1.43168	2.38454
ENSG00000092607	0	NA	NA	NA	NA	NA	TBX15	chr1	0	0	0	0	0	0
ENSG00000092621	13.1288	-2.61083	2.10029	-1.24308	0.213838	0.710593	PHGDH	chr1	0.000253	0.012421	0.270538	0.004415	0.001555	0.003047
ENSG00000092758	193.033	0.742132	0.708475	1.04751	0.294866	0.775818	COL9A3	chr20	1.05994	0.645875	0.422202	0.427774	1.84508	1.5973
ENSG00000092820	9576.83	0.185976	0.342996	0.542209	0.587674	0.927497	EZR	chr6	58.9552	63.2088	39.3475	53.7359	77.878	70.5495
ENSG00000092841	1488.72	1.13777	0.523298	2.17423	0.0296875	0.328221	MYL6	chr12	4.29898	7.6803	16.3129	12.4062	13.5847	36.0029
ENSG00000092847	1135.2	-0.217932	0.472877	-0.460864	0.644896	0.94074	AGO1	chr1	0.889544	0.848924	1.78062	1.4194	1.38545	0.626578
ENSG00000092850	0	NA	NA	NA	NA	NA	TEKT2	chr1	0	0	0	0	0	0
ENSG00000092853	9658.59	-0.373354	0.336739	-1.10873	0.267545	0.757662	CLSPN	chr1	26.9152	34.151	46.8806	27.0421	40.5715	26.1142
ENSG00000092871	1682.45	-0.963161	0.318431	-3.02471	0.0024887	0.101097	RFFL	chr17	2.76514	3.16011	4.36092	2.03578	2.60569	2.28983
ENSG00000092929	1147.22	0.822999	0.511791	1.60808	0.107818	0.549799	UNC13D	chr17	3.3843	3.77438	0.977096	5.76005	4.40743	2.94175
ENSG00000092931	219.3	0.0192963	0.535257	0.0360506	0.971242	0.996639	MFSD11	chr17	0.518763	0.390866	0.335137	0.559372	0.338563	0.306782
ENSG00000092964	719.87	0.38139	0.375301	1.01623	0.309522	0.789651	DPYSL2	chr8	2.29932	0.465239	0.649542	1.18554	0.83933	2.78407
ENSG00000092969	0	NA	NA	NA	NA	NA	TGFB2	chr1	0	0	0	0	0.008484	0
ENSG00000092978	2881.05	0.00839924	0.330246	0.0254333	0.979709	0.997117	GPATCH2	chr1	15.5857	17.0657	13.3375	11.8652	10.6883	18.6661
ENSG00000093000	4118.85	-0.123595	0.347265	-0.355909	0.721908	0.954552	NUP50	chr22	16.4213	6.21458	14.1532	7.95779	6.69123	18.6806
ENSG00000093009	12695.6	-0.352506	0.413415	-0.852668	0.393843	0.848311	CDC45	chr22	189.571	77.6659	122.752	130.494	117.597	68.0555
ENSG00000093010	75.5745	0.386847	0.931016	0.415511	0.677768	0.946366	COMT	chr22	0.023737	0.681856	2.77832	1.62874	0.075644	0.152877
ENSG00000093072	0.153734	-0.840481	4.08047	-0.205976	0.836809	NA	ADA2	chr22	0	0	0.005877	0	0	0
ENSG00000093100	0	NA	NA	NA	NA	NA	AC016026.1	chr22	0.237977	1.42516	0.054971	1.48486	0.683152	1.06513
ENSG00000093134	0.170899	1.08307	4.08047	0.265428	0.79068	NA	VNN3	chr6	0	0	0	0	0.004391	0
[truncated: 56,289 more rows]
